# Supplementary material for: Pd-Catalyzed C(sp2)–H olefination: synthesis of N-alkylated isoindolinone scaffolds from aryl amides of amino acid esters
Source: Royal Society of Chemistry journal article supplement (doi:10.1039/d1ob01997j), 2021-01-01
Supplement: d1ob01997j1.pdf [file d1ob01997j1.pdf]

## Supplementary Information

### **Pd-Catalyzed C(sp<sup>2</sup>)-H Olefination: Synthesis of *N*-alkylated Isoindolinone Scaffolds from Arylamide of Amino acid esters**

Manish K. Gupta,<sup>a,b</sup> Chinmay K. Jena,<sup>a,b</sup> and Nagendra K. Sharma<sup>\*,a, b</sup>,

*School of Chemical Sciences, National Institute of Science Education and Research (NISER), Jatani-752050, Odisha, India.*

& HBNI-Mumbai, Mumbai-India

\*Corresponding author. Tel.: 0674-249-4141; fax: +91 (674) 2494004; E-mail: [nagendra@niser.ac.in](mailto:nagendra@niser.ac.in)

### Contents

1. NMR and Mass spectra of (**3a-3l**, **6a-6r**) .....S2
2. X-ray studies of single crystal of indolinone (**6a**).....S62

# 1. NMR and Mass spectra of (3a-3l, 6a-6r)

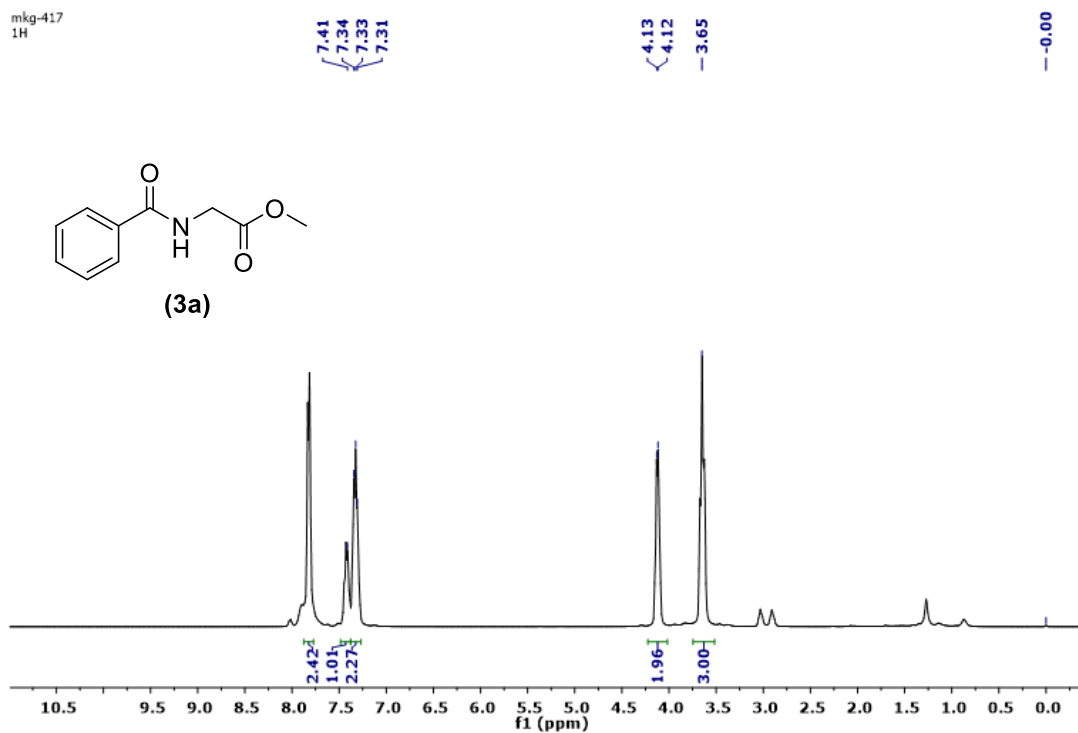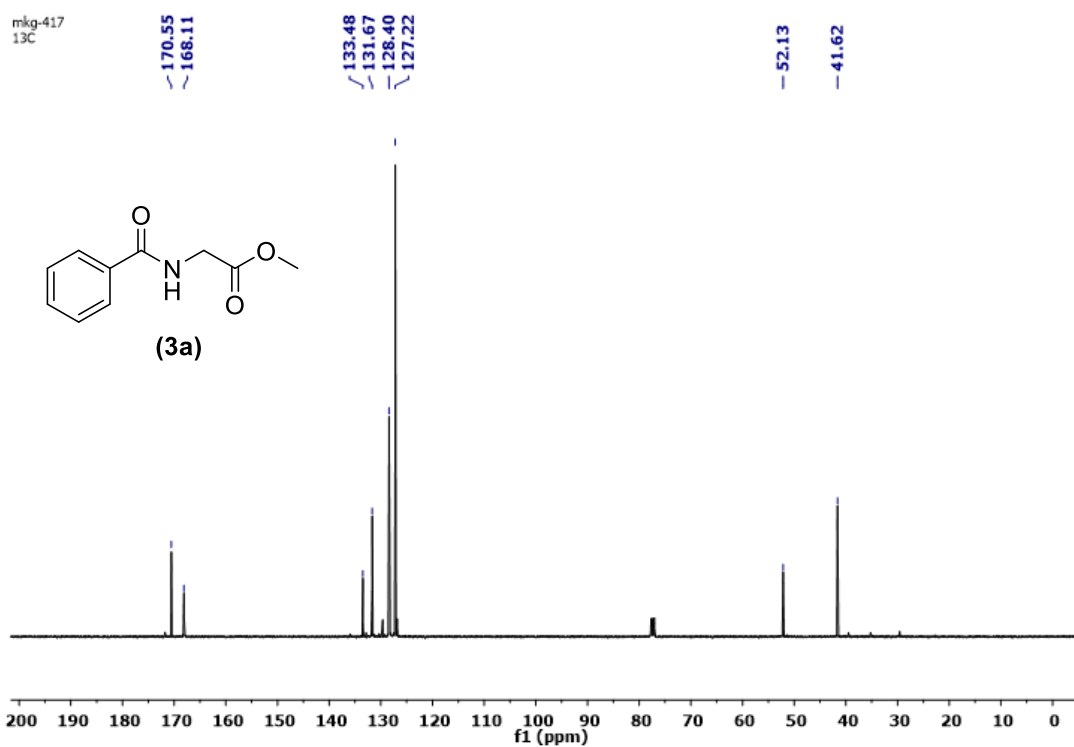

Figure. S1.  $^1\text{H}$ ,  $^{13}\text{C}$  NMR spectra of Benzamide 3a

# Display Report

## Analysis Info

Analysis Name D:\Data\MAY-2021\NKS\31052021\_NKS\_MKG\_417.d  
Method Pos\_tune\_low.m  
Sample Name Tmix-131118  
Comment

Acquisition Date 5/31/2021 7:31:08 PM

Operator Amit S.Sahu  
Instrument micrOTOF-Q II 10337

## Acquisition Parameter

|             |            |                       |           |                  |           |
|-------------|------------|-----------------------|-----------|------------------|-----------|
| Source Type | ESI        | Ion Polarity          | Positive  | Set Nebulizer    | 0.4 Bar   |
| Focus       | Not active | Set Capillary         | 4500 V    | Set Dry Heater   | 180 °C    |
| Scan Begin  | 50 m/z     | Set End Plate Offset  | -500 V    | Set Dry Gas      | 4.0 l/min |
| Scan End    | 3000 m/z   | Set Collision Cell RF | 130.0 Vpp | Set Divert Valve | Waste     |

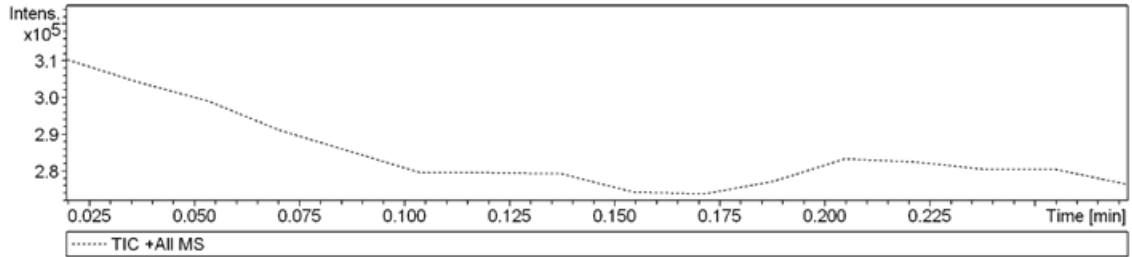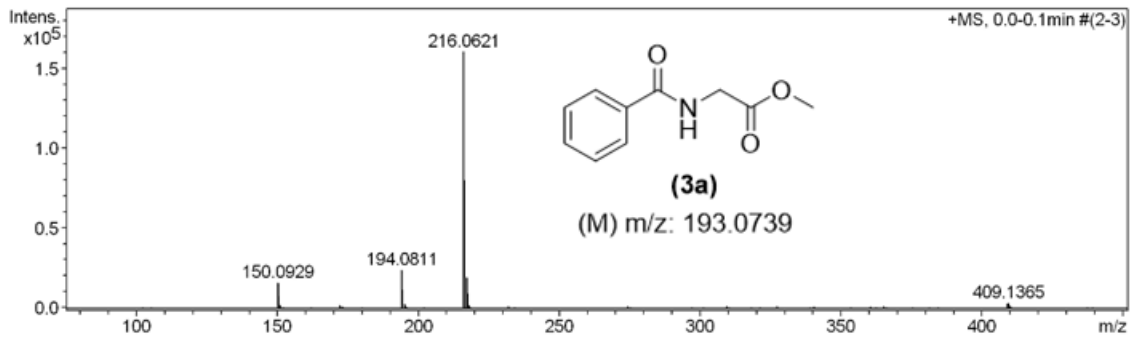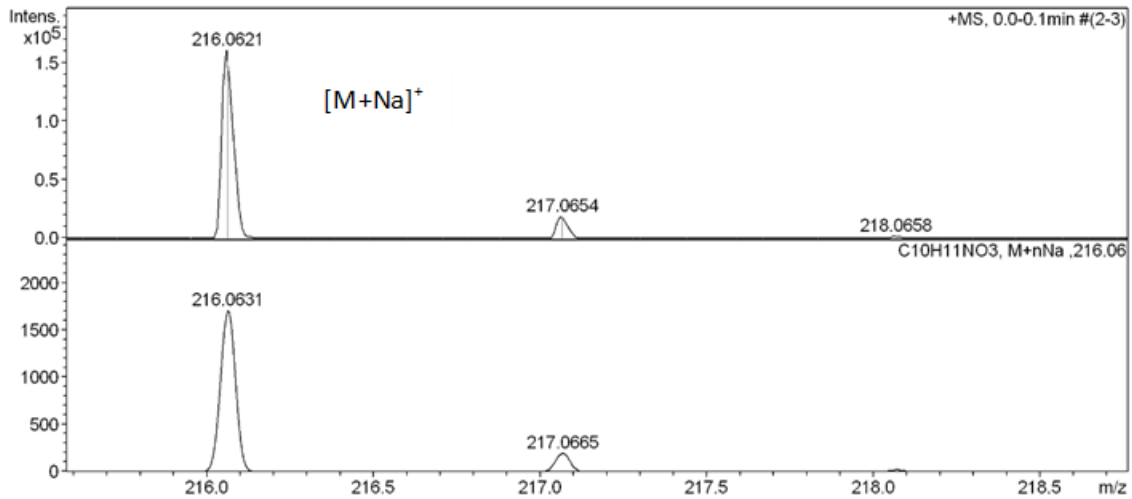

**Figure. S2.** ESI-HRMS spectra of Benzamide **3a**

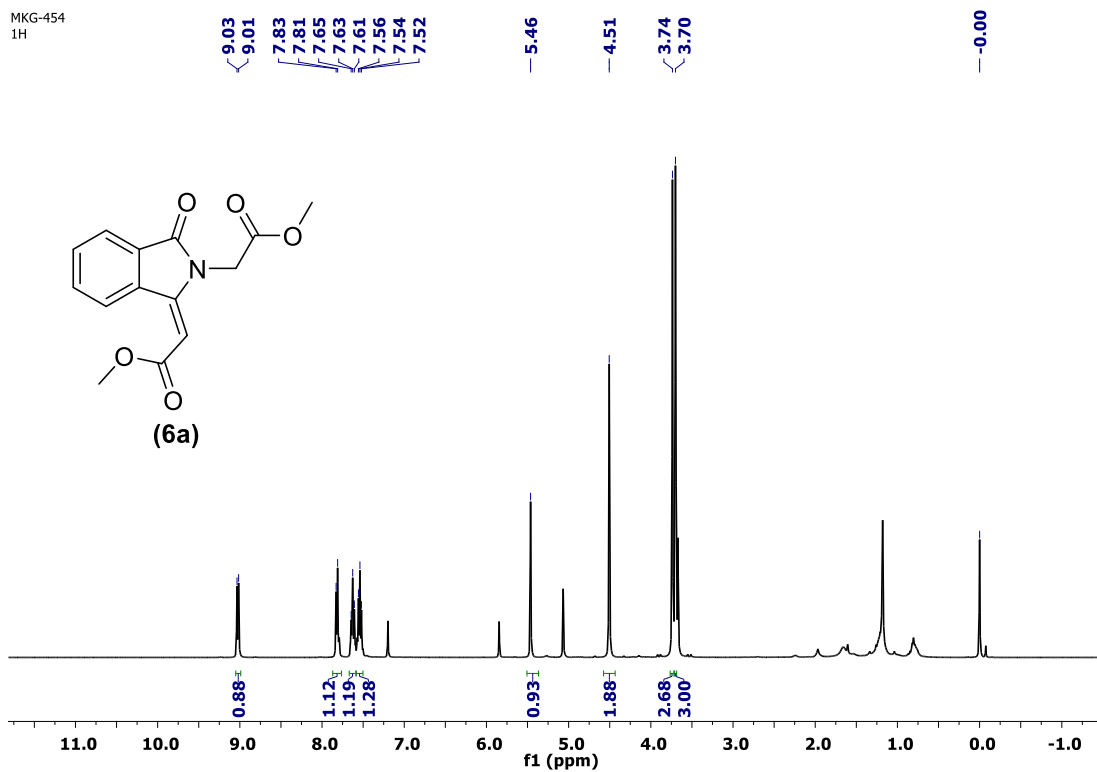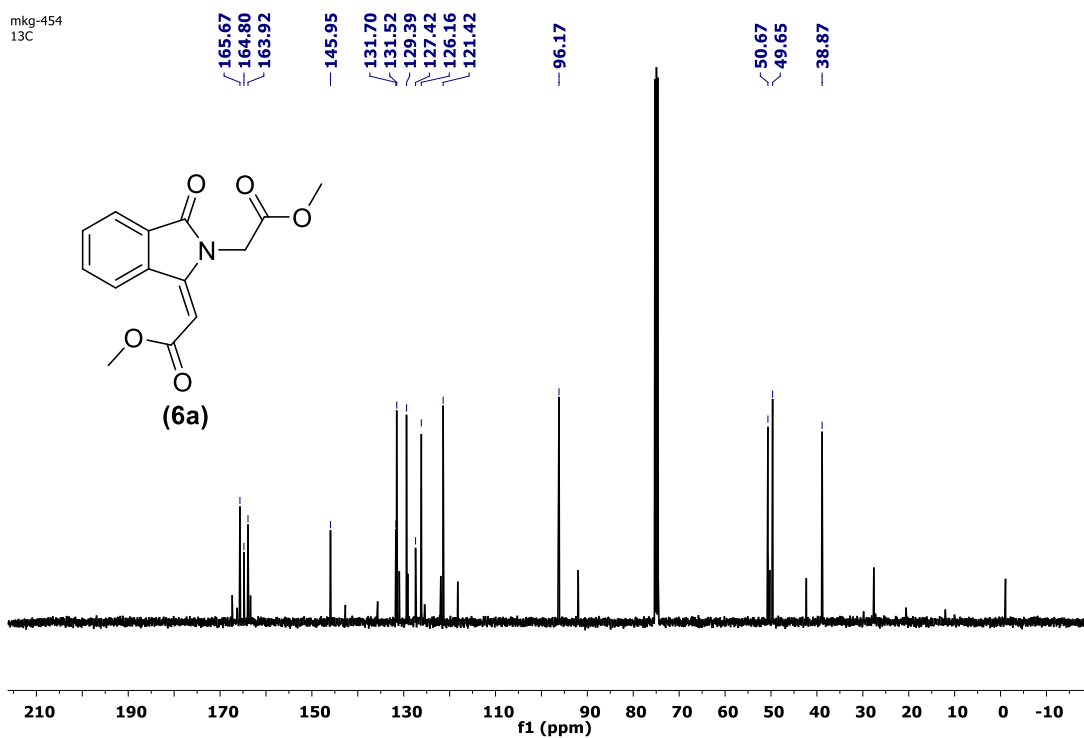

Figure. S3.  $^1\text{H}$ ,  $^{13}\text{C}$  NMR spectra of indolinone **6a**

# Display Report

## Analysis Info

Analysis Name D:\Data\MAY-2021\NKS\31052021\_NKS\_MKG\_454.d  
Method Pos\_tune\_low.m  
Sample Name Tmix-131118  
Comment

Acquisition Date 5/31/2021 7:35:22 PM

Operator Amit S.Sahu  
Instrument micrOTOF-Q II 10337

## Acquisition Parameter

|             |            |                       |           |                  |           |
|-------------|------------|-----------------------|-----------|------------------|-----------|
| Source Type | ESI        | Ion Polarity          | Positive  | Set Nebulizer    | 0.4 Bar   |
| Focus       | Not active | Set Capillary         | 4500 V    | Set Dry Heater   | 180 °C    |
| Scan Begin  | 50 m/z     | Set End Plate Offset  | -500 V    | Set Dry Gas      | 4.0 l/min |
| Scan End    | 3000 m/z   | Set Collision Cell RF | 130.0 Vpp | Set Divert Valve | Waste     |

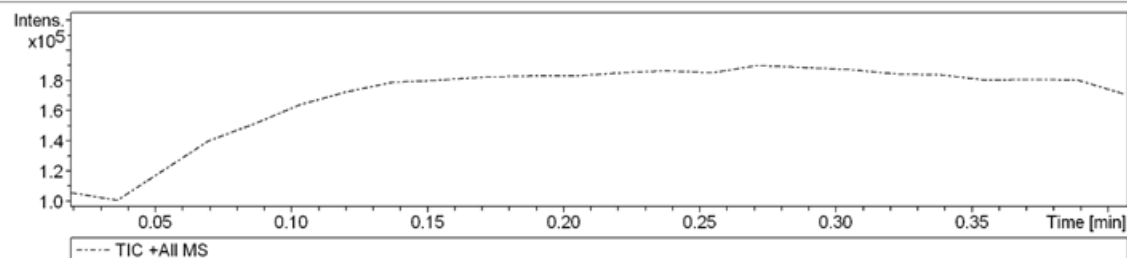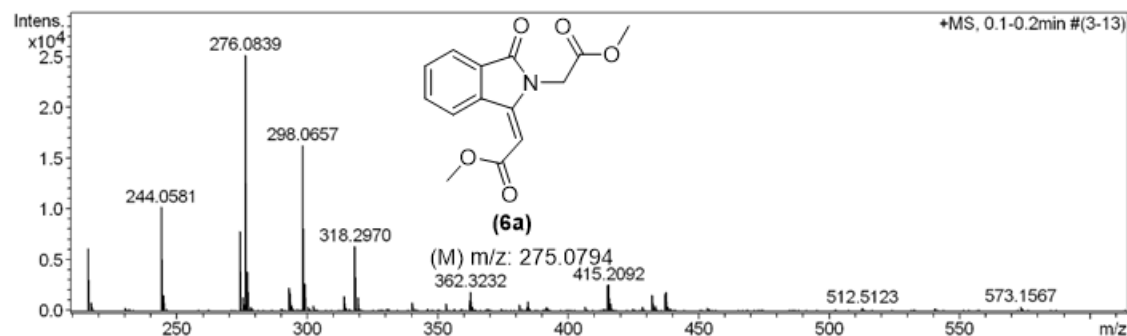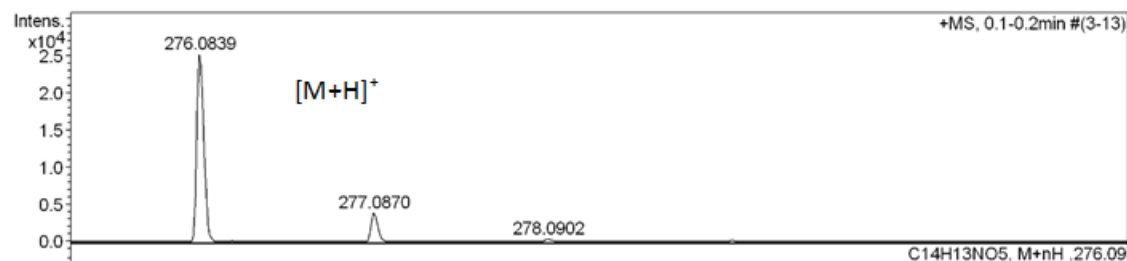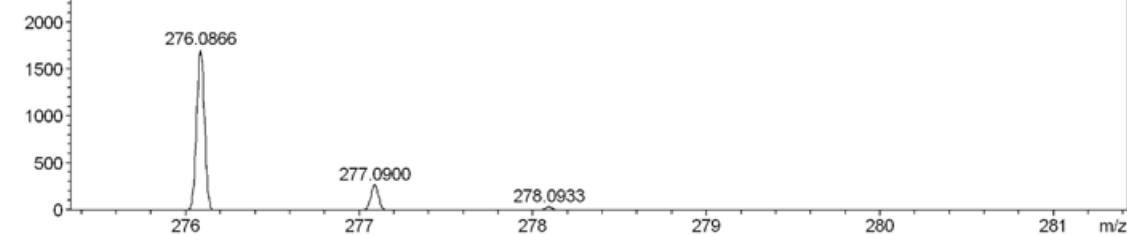

Figure. S4. ESI-HRMS spectra of indolinone **6a**

mkg-459  
1H

9.11  
9.09  
7.90  
7.88  
7.71  
7.69  
7.67  
7.62  
7.60  
7.58

5.53

4.58  
4.30  
4.28  
4.26  
4.24  
3.78

1.37  
1.35  
1.33

0.00

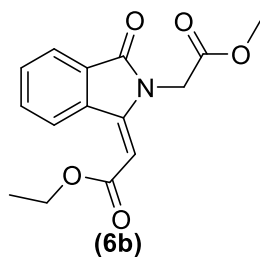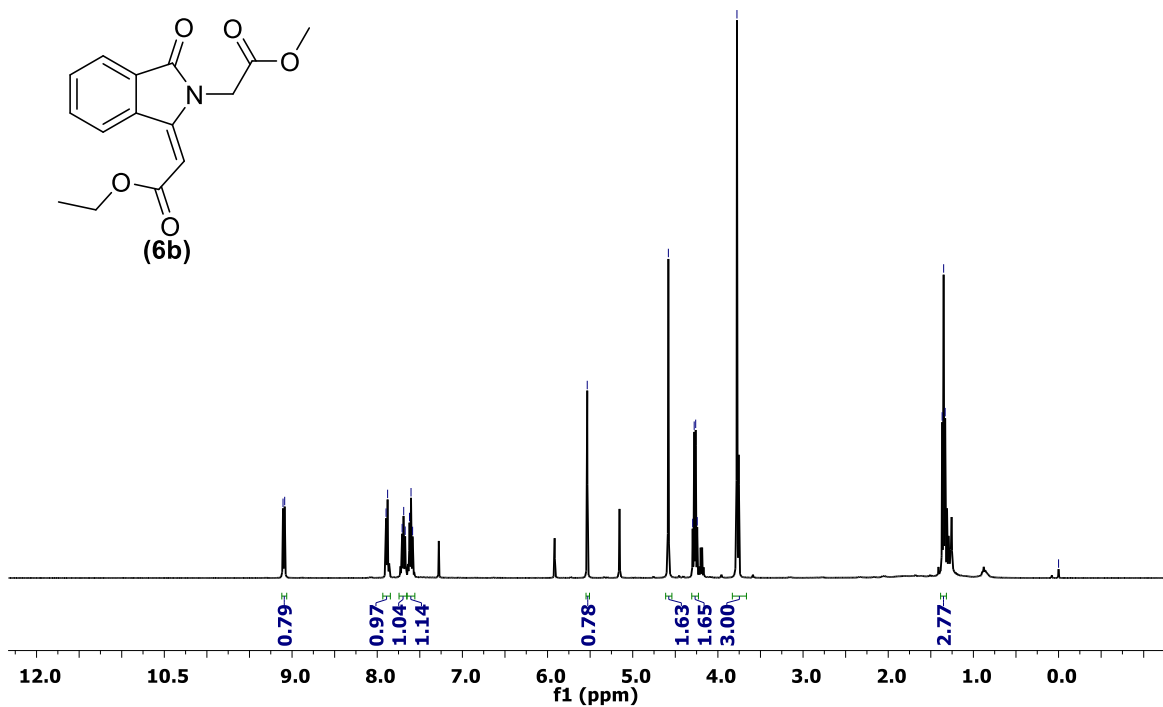

mkg-459  
13C

167.84  
166.96  
165.64

147.84

133.88  
133.59  
131.43  
129.55  
128.32  
123.51

98.86

60.68

52.79

40.99

14.31

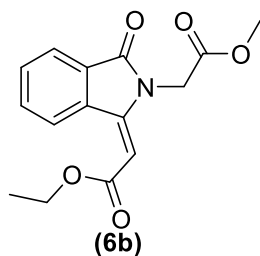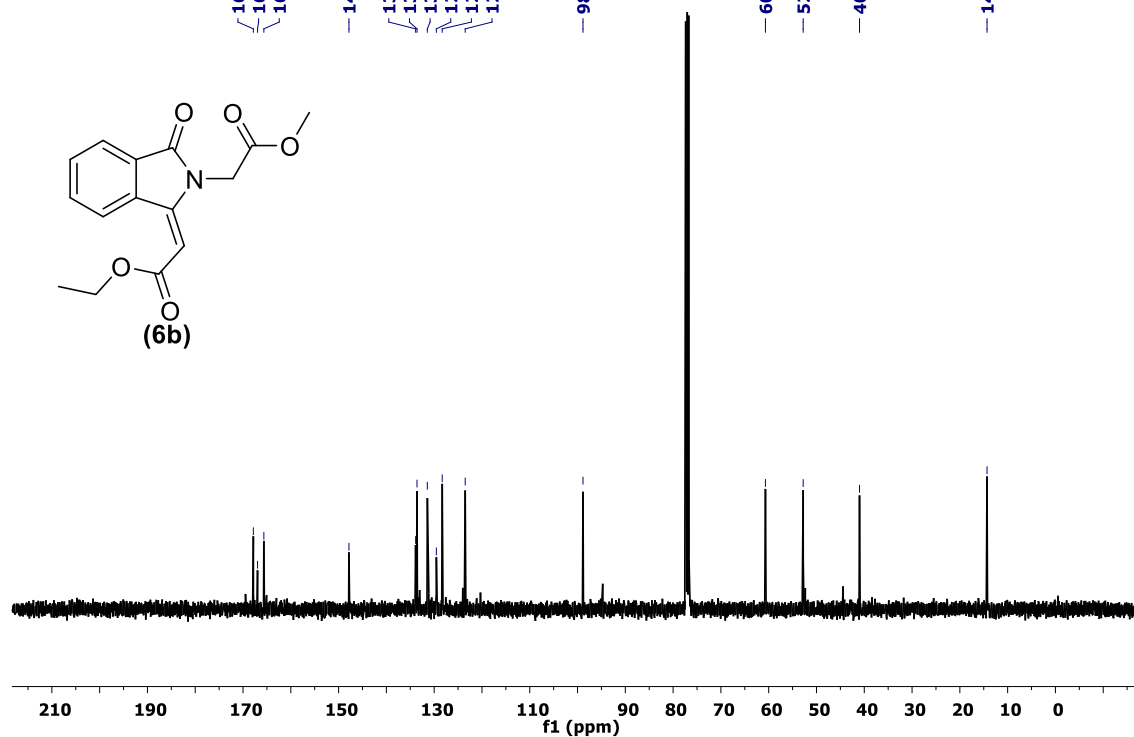

Figure. S5.  $^1\text{H}$ ,  $^{13}\text{C}$  NMR spectra of indolinone **6b**

## Display Report

### Analysis Info

Analysis Name D:\Data\MAY-2021\NKS\31052021\_NKS\_MKG\_459.d  
Method Pos\_tune\_low.m  
Sample Name Tmix-131118  
Comment

Acquisition Date 5/31/2021 7:38:17 PM

Operator Amit S.Sahu  
Instrument micrOTOF-Q II 10337

### Acquisition Parameter

|             |            |                       |           |                  |           |
|-------------|------------|-----------------------|-----------|------------------|-----------|
| Source Type | ESI        | Ion Polarity          | Positive  | Set Nebulizer    | 0.4 Bar   |
| Focus       | Not active | Set Capillary         | 4500 V    | Set Dry Heater   | 180 °C    |
| Scan Begin  | 50 m/z     | Set End Plate Offset  | -500 V    | Set Dry Gas      | 4.0 l/min |
| Scan End    | 3000 m/z   | Set Collision Cell RF | 130.0 Vpp | Set Divert Valve | Waste     |

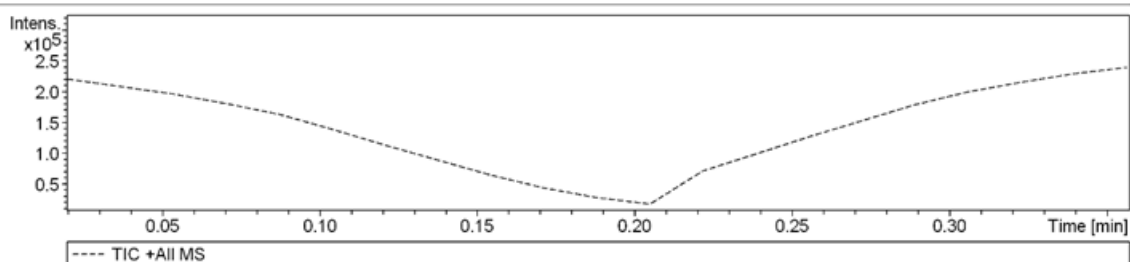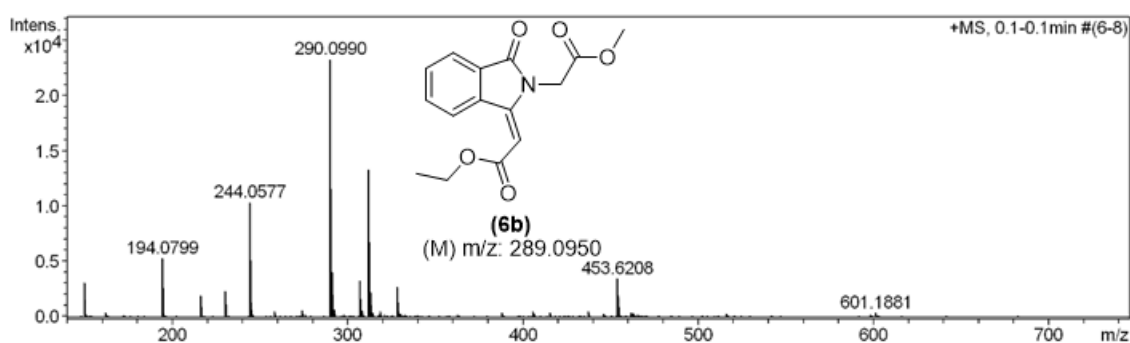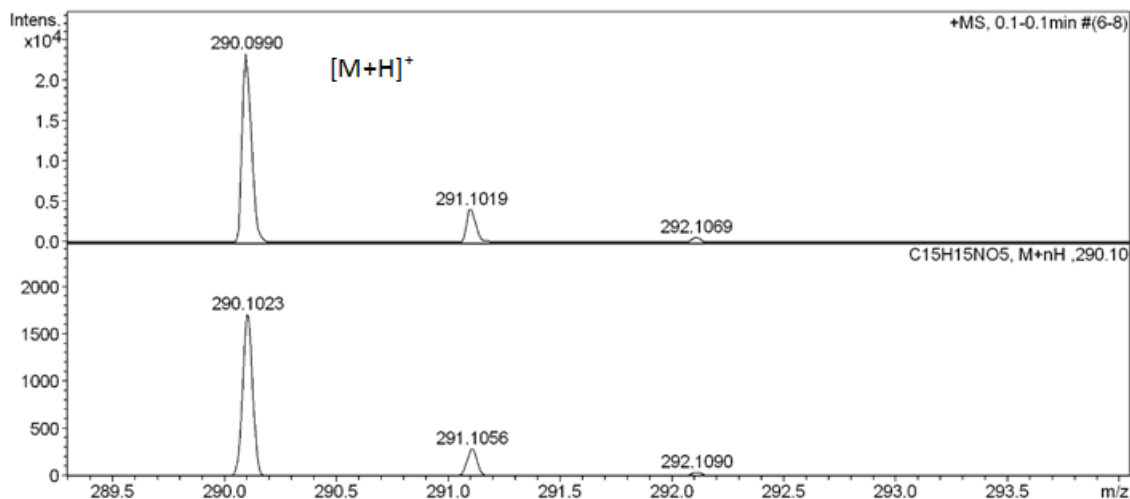

**Figure. S6.** ESI-HRMS spectra of indolinone **6b**

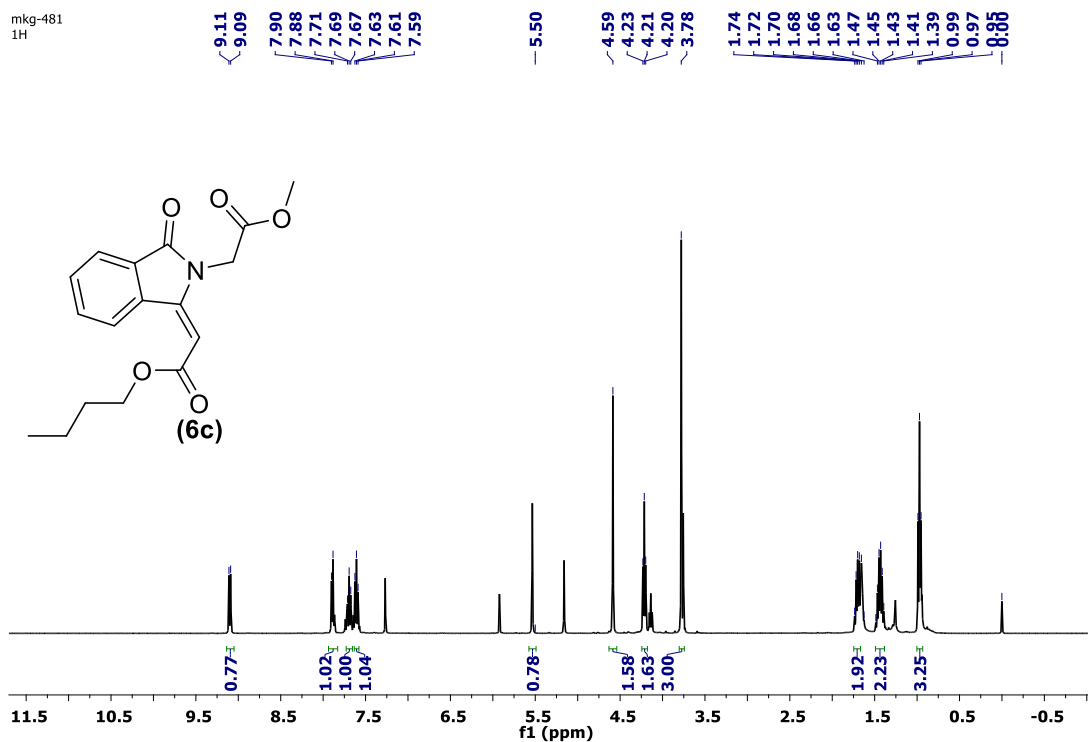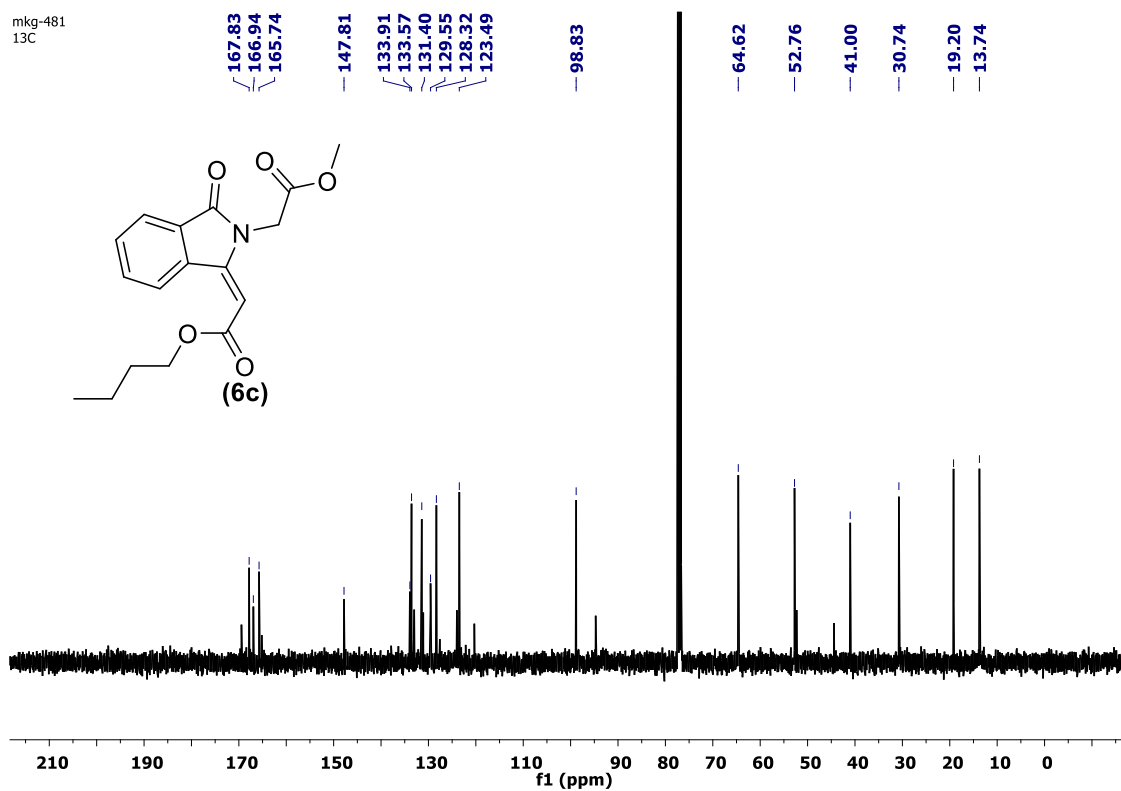

Figure. S7.  $^1\text{H}$ ,  $^{13}\text{C}$  NMR spectra of indolinone **6c**



## Display Report

### Analysis Info

Analysis Name D:\Data\MAY-2021\NKS\31052021\_NKS\_MKG\_481-A.d  
Method Pos\_tune\_low.m  
Sample Name Tmix-131118  
Comment

Acquisition Date 5/31/2021 7:42:45 PM

Operator Amit S.Sahu  
Instrument micrOTOF-Q II 10337

### Acquisition Parameter

|             |            |                       |           |                  |           |
|-------------|------------|-----------------------|-----------|------------------|-----------|
| Source Type | ESI        | Ion Polarity          | Positive  | Set Nebulizer    | 0.4 Bar   |
| Focus       | Not active | Set Capillary         | 4500 V    | Set Dry Heater   | 180 °C    |
| Scan Begin  | 50 m/z     | Set End Plate Offset  | -500 V    | Set Dry Gas      | 4.0 l/min |
| Scan End    | 3000 m/z   | Set Collision Cell RF | 130.0 Vpp | Set Divert Valve | Waste     |

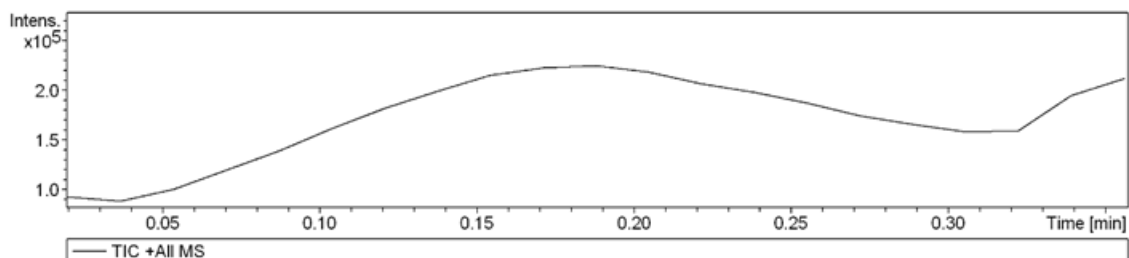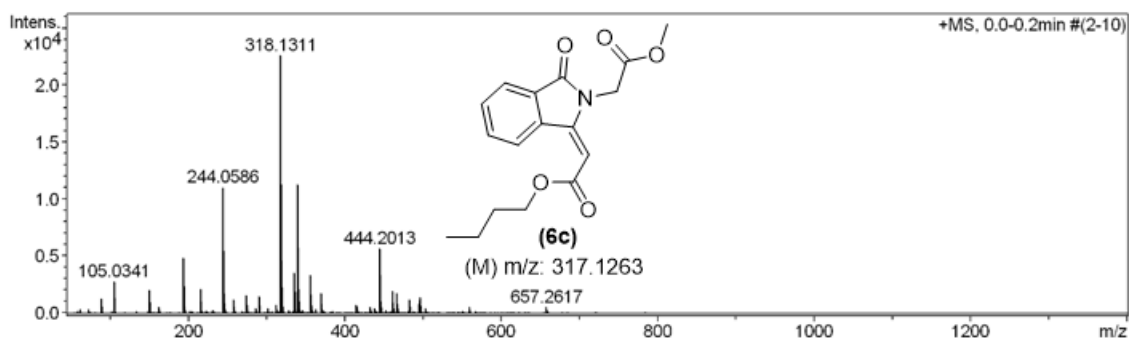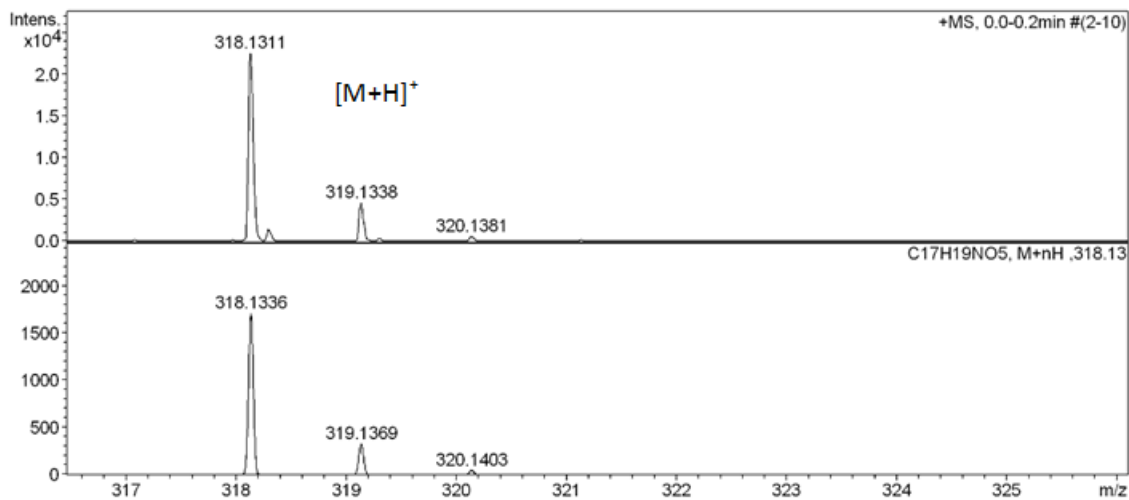

**Figure. S8.** ESI-HRMS spectra of indolinone **6c**

mkg-187ala  
1H

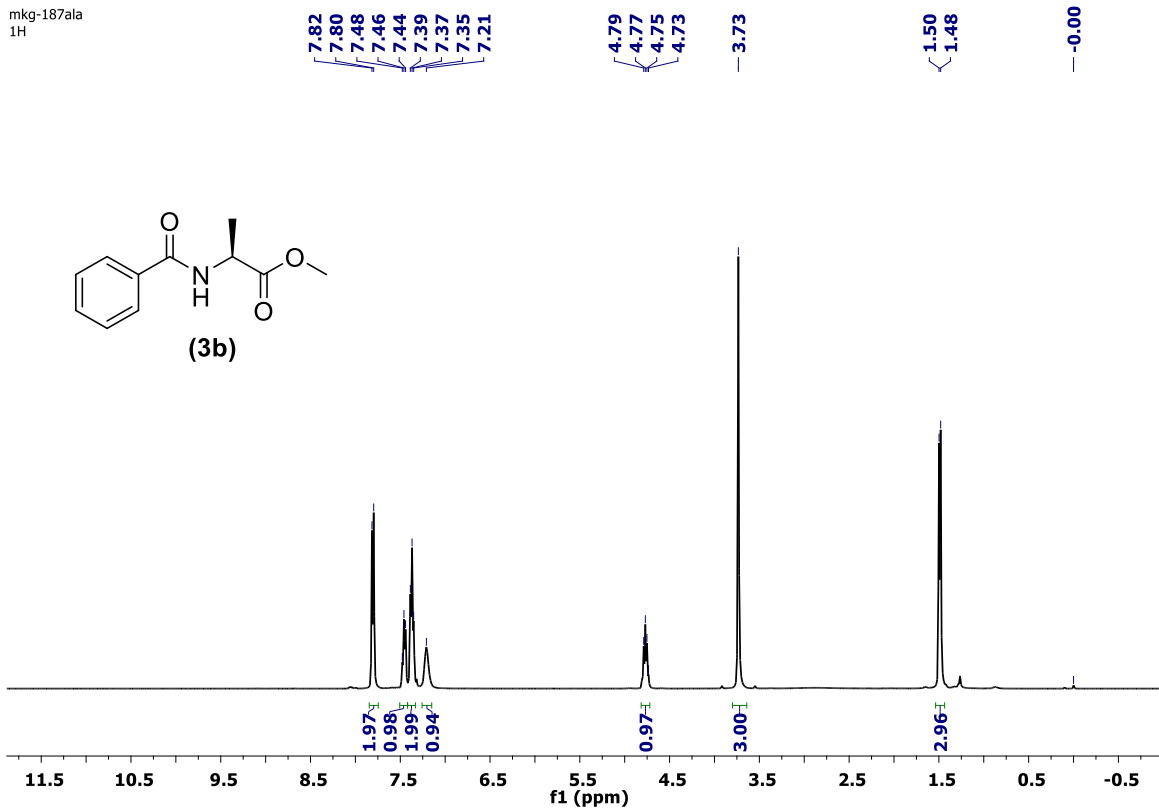

mkg-187ala  
13C

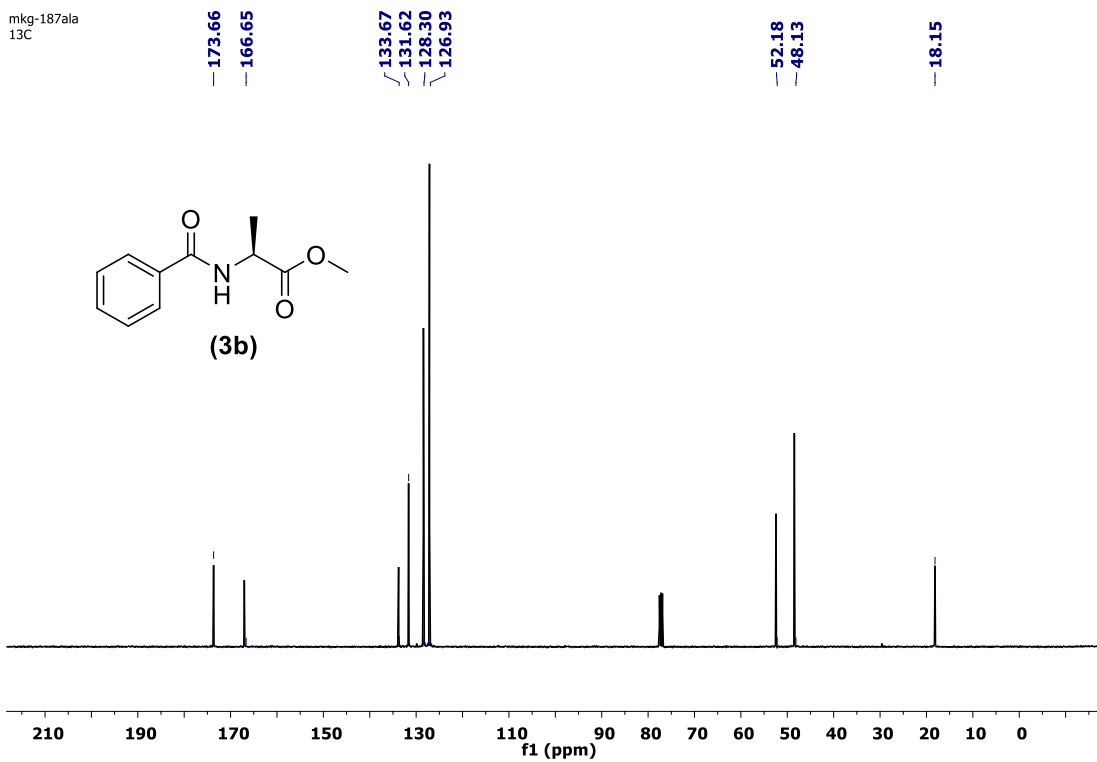

Figure. S9. <sup>1</sup>H, <sup>13</sup>C NMR spectra of benzamide 3b

## Display Report

### Analysis Info

Analysis Name D:\Data\JUN-2021\NKS\09062021\_NKS\_MKG\_488-ALA.d  
Method Pos\_tune\_low.m  
Sample Name Tmix-131118  
Comment

Acquisition Date 6/11/2021 7:52:34 PM

Operator Amit S.Sahu  
Instrument micrOTOF-Q II 10337

### Acquisition Parameter

|             |            |                       |           |                  |           |
|-------------|------------|-----------------------|-----------|------------------|-----------|
| Source Type | ESI        | Ion Polarity          | Positive  | Set Nebulizer    | 0.4 Bar   |
| Focus       | Not active | Set Capillary         | 4500 V    | Set Dry Heater   | 180 °C    |
| Scan Begin  | 50 m/z     | Set End Plate Offset  | -500 V    | Set Dry Gas      | 4.0 l/min |
| Scan End    | 3000 m/z   | Set Collision Cell RF | 130.0 Vpp | Set Divert Valve | Waste     |

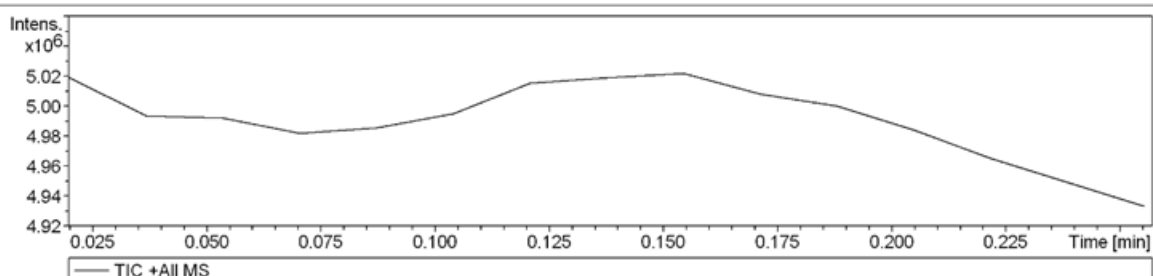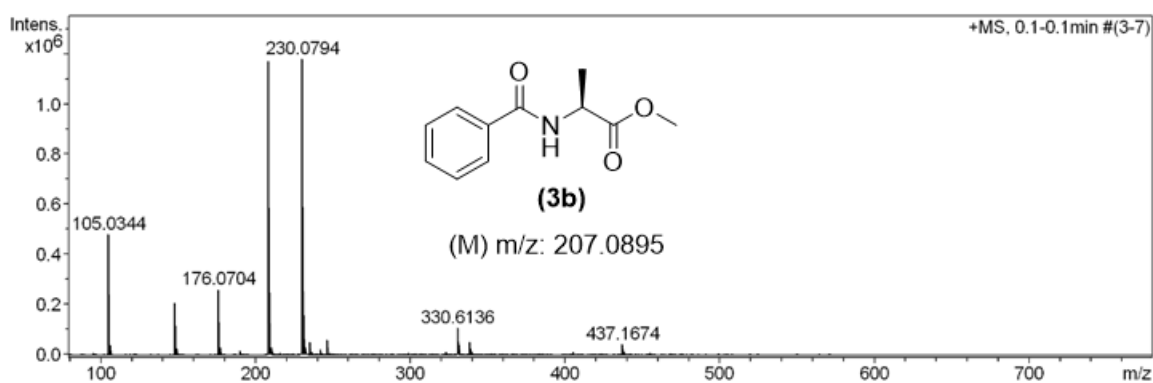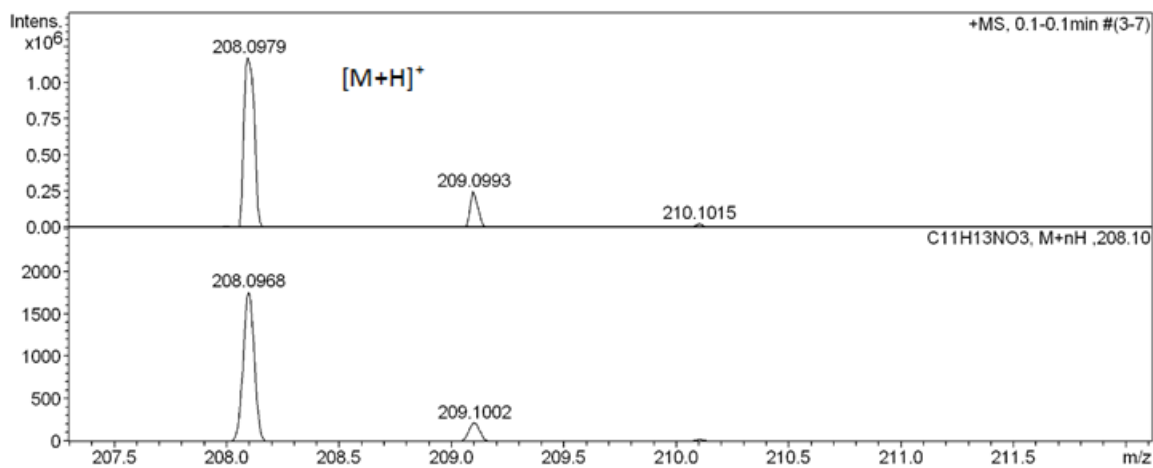

**Figure. S10.** ESI-HRMS spectra of benzamide **3b**

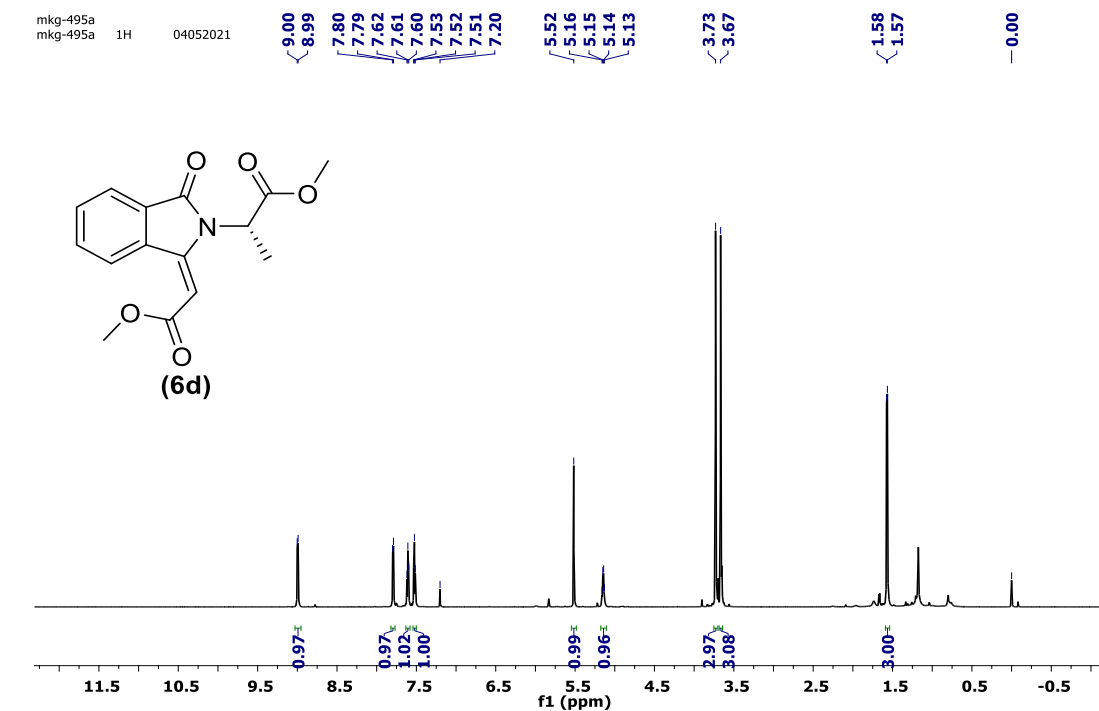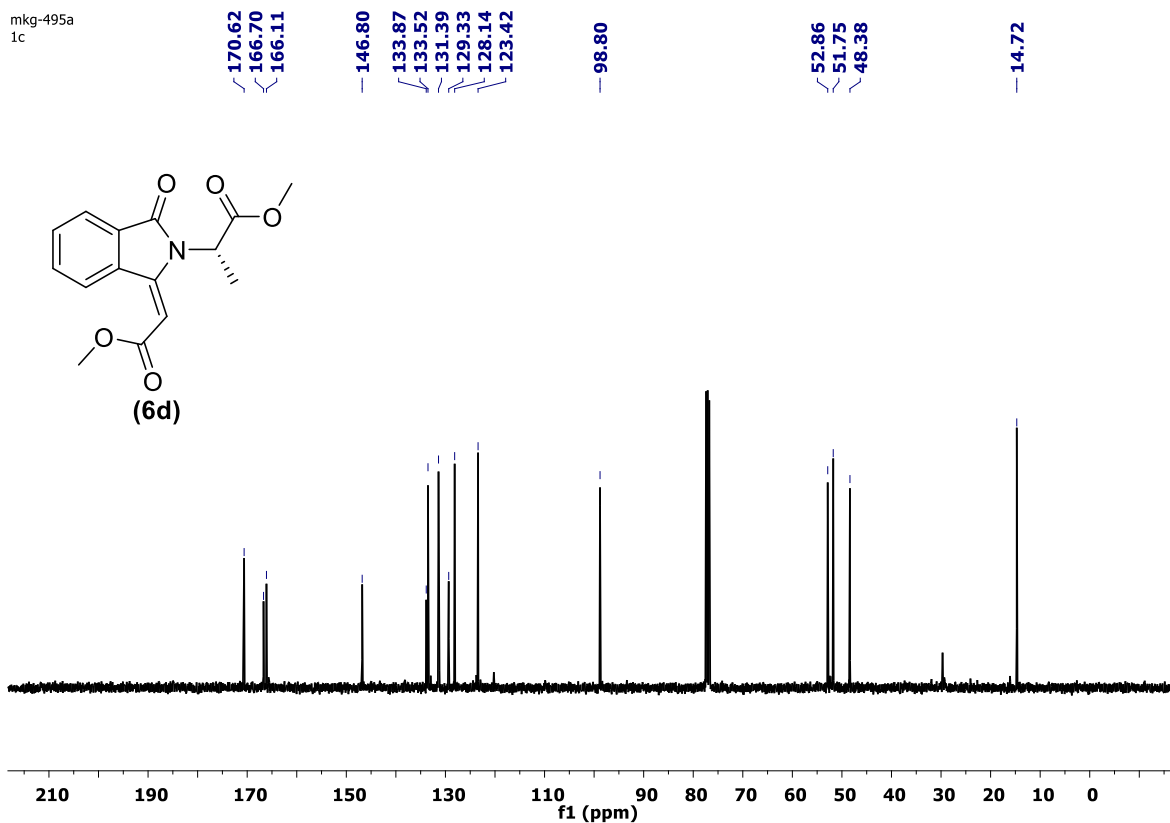

Figure. S11.  $^1\text{H}$ ,  $^{13}\text{C}$  NMR spectra of indolinone **6d**

## Display Report

### Analysis Info

Analysis Name D:\Data\JUN-2021\NKS\09062021\_NKS\_MKG\_495-A.d  
Method Pos\_tune\_low.m  
Sample Name Tmix-131118  
Comment

Acquisition Date 6/11/2021 7:57:48 PM

Operator Amit S.Sahu  
Instrument micrOTOF-Q II 10337

### Acquisition Parameter

|             |            |                       |           |                  |           |
|-------------|------------|-----------------------|-----------|------------------|-----------|
| Source Type | ESI        | Ion Polarity          | Positive  | Set Nebulizer    | 0.4 Bar   |
| Focus       | Not active | Set Capillary         | 4500 V    | Set Dry Heater   | 180 °C    |
| Scan Begin  | 50 m/z     | Set End Plate Offset  | -500 V    | Set Dry Gas      | 4.0 l/min |
| Scan End    | 3000 m/z   | Set Collision Cell RF | 130.0 Vpp | Set Divert Valve | Waste     |

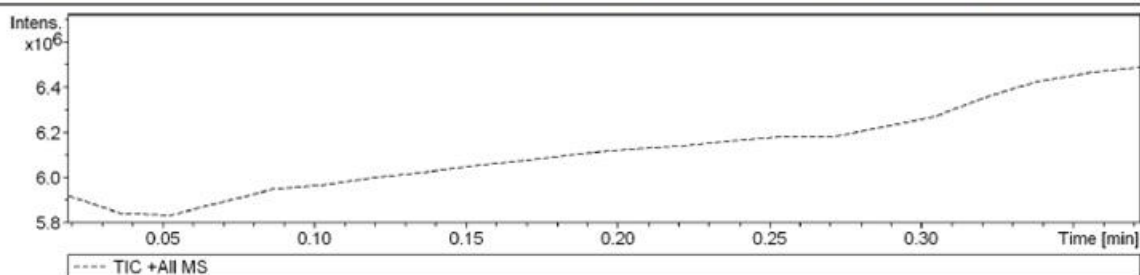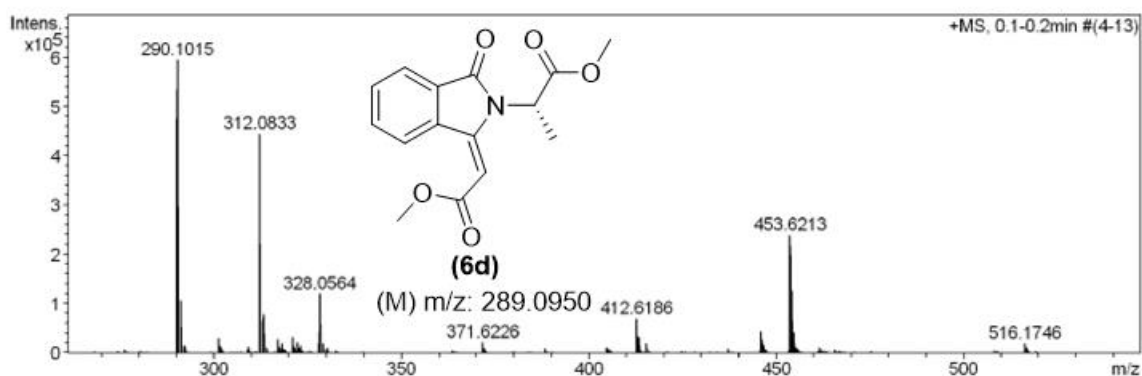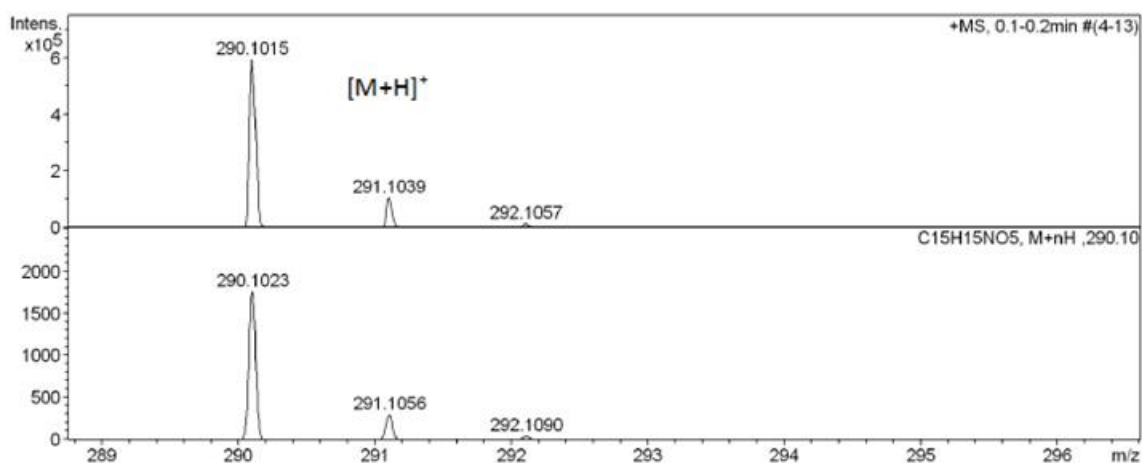

Figure. S12. ESI-HRMS spectra of indolinone **6d**

mkg-495b  
mkg-495b 1H 04052021

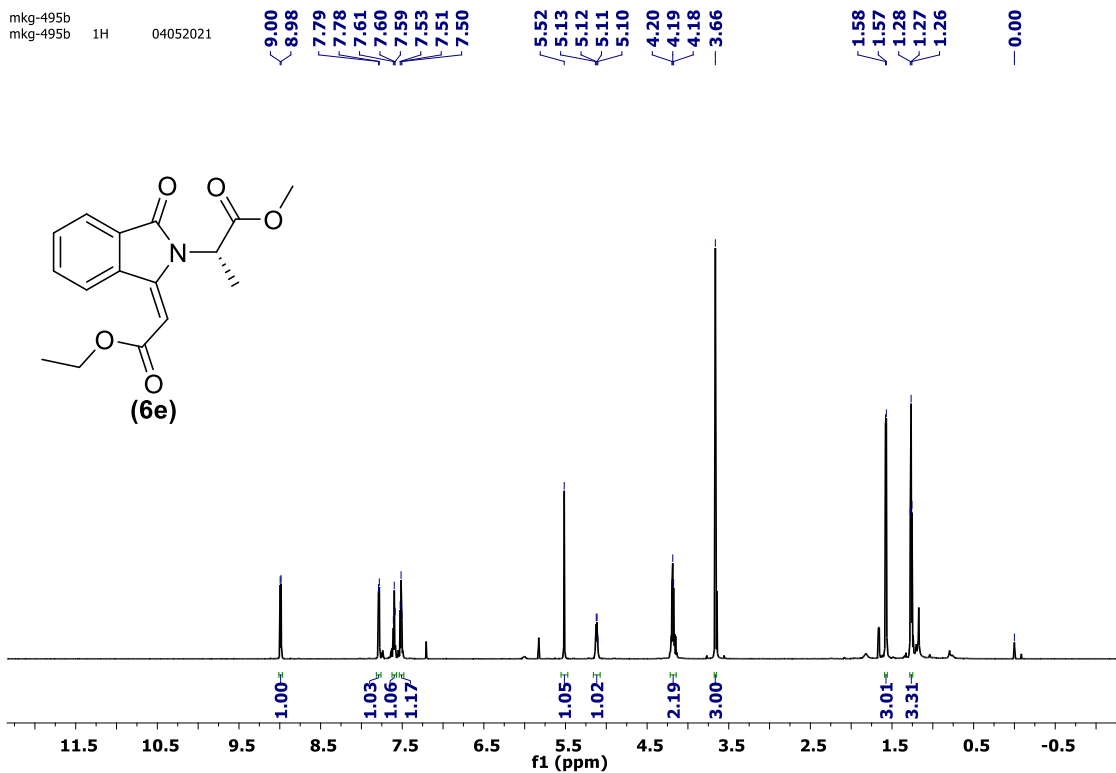

MKG-495B  
13C

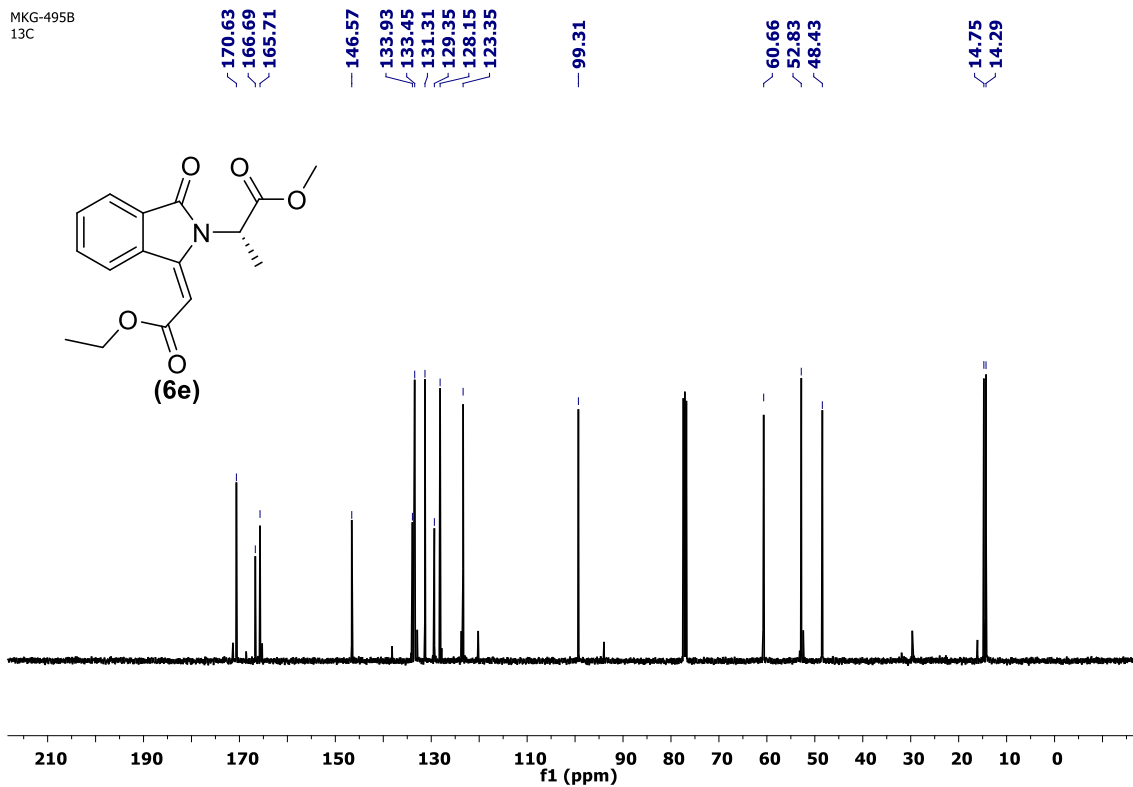

Figure. S13. <sup>1</sup>H, <sup>13</sup>C NMR spectra of indolinone **6e**

## Display Report

### Analysis Info

Analysis Name D:\Data\JUN-2021\NKS\09062021\_NKS\_MKG\_495-B.d  
Method Pos\_tune\_low.m  
Sample Name Tmix-131118  
Comment

Acquisition Date 6/11/2021 8:03:10 PM

Operator Amit S.Sahu  
Instrument micrOTOF-Q II 10337

### Acquisition Parameter

|             |            |                       |           |                  |           |
|-------------|------------|-----------------------|-----------|------------------|-----------|
| Source Type | ESI        | Ion Polarity          | Positive  | Set Nebulizer    | 0.4 Bar   |
| Focus       | Not active | Set Capillary         | 4500 V    | Set Dry Heater   | 180 °C    |
| Scan Begin  | 50 m/z     | Set End Plate Offset  | -500 V    | Set Dry Gas      | 4.0 l/min |
| Scan End    | 3000 m/z   | Set Collision Cell RF | 130.0 Vpp | Set Divert Valve | Waste     |

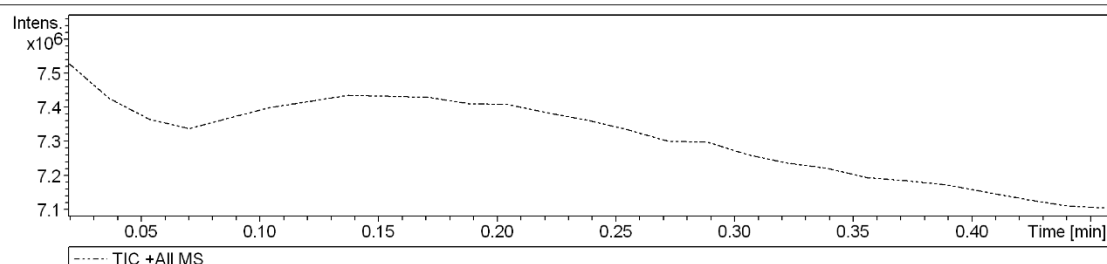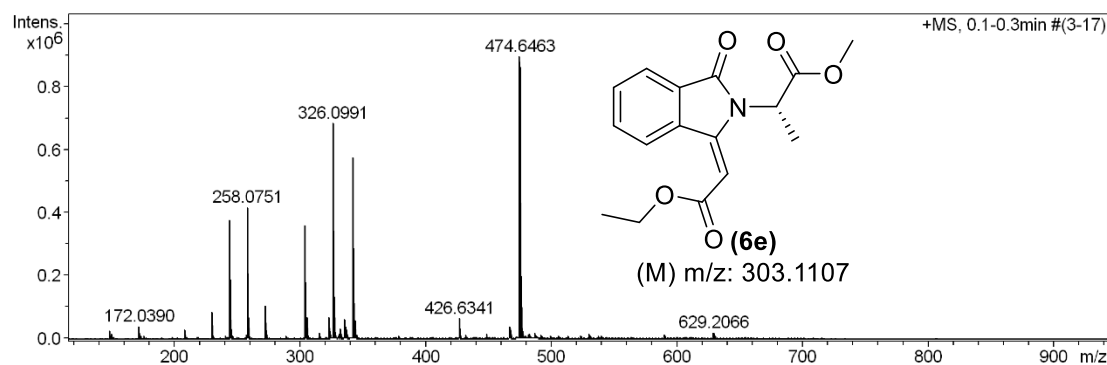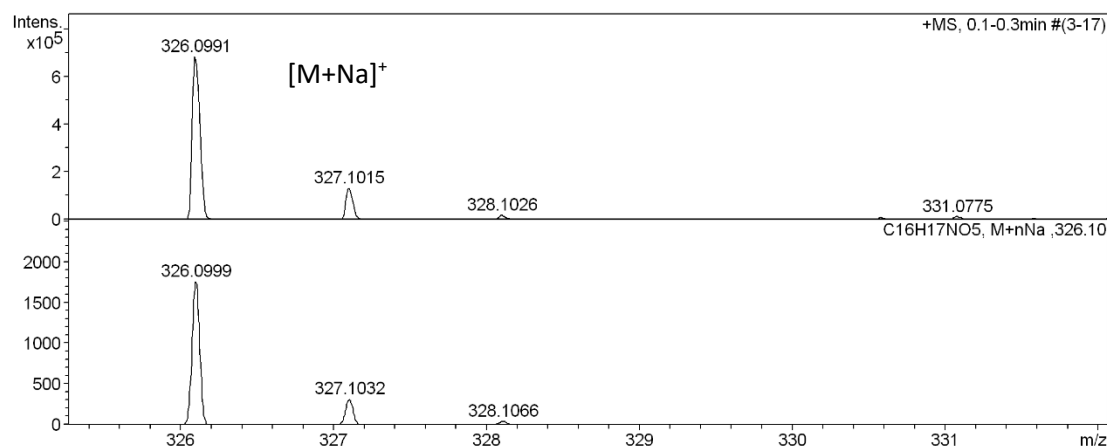

**Figure. S14.** ESI-HRMS spectra of indolinone **6e**

mkg-498a

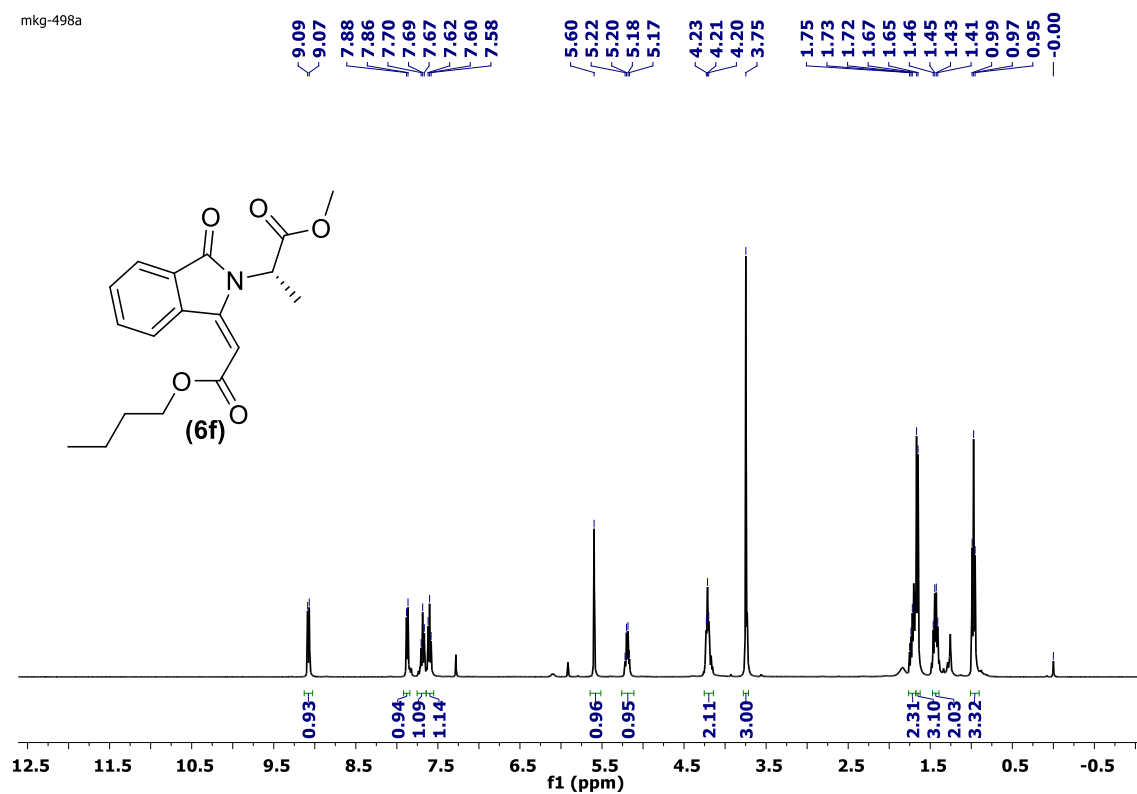

mkg-498a  
13c

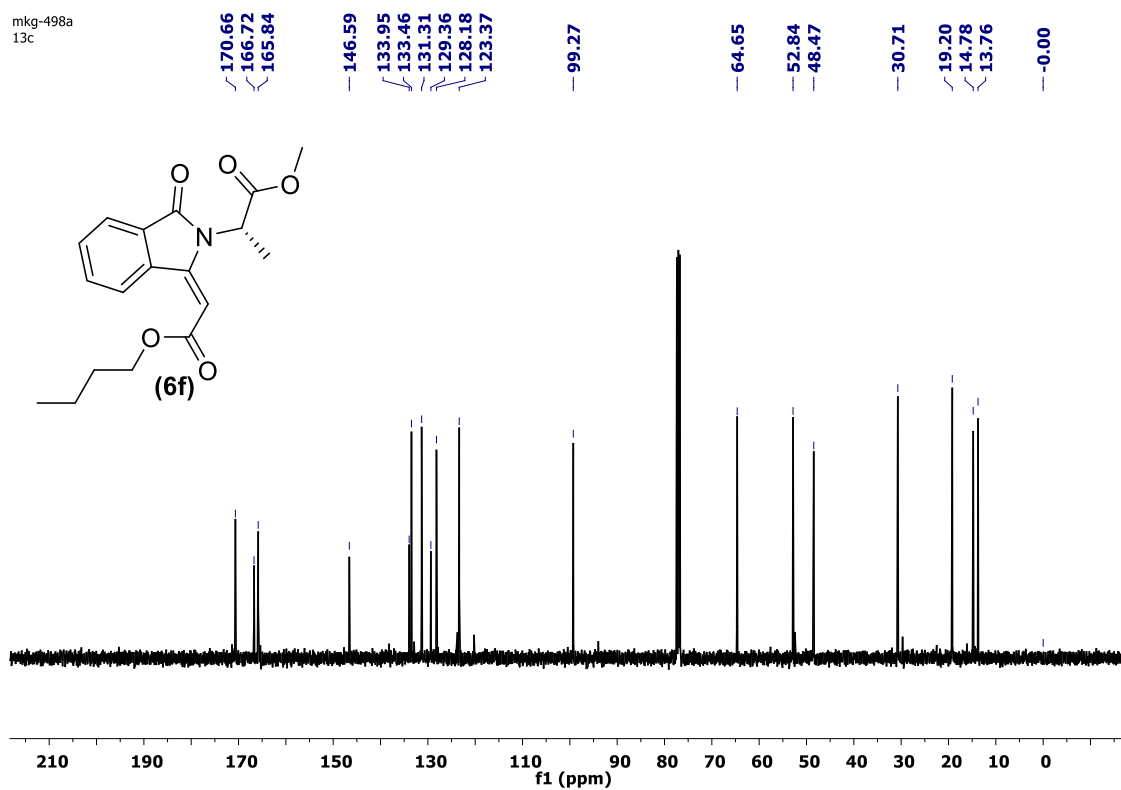

Figure. S15. <sup>1</sup>H, <sup>13</sup>C NMR spectra of indolinone 6f



# Display Report

## Analysis Info

Analysis Name D:\Data\JUN-2021\NKS\09062021\_NKS\_MKG\_498-A.d  
Method Pos\_tune\_low.m  
Sample Name Tmix-131118  
Comment

Acquisition Date 6/11/2021 8:06:39 PM

Operator Amit S.Sahu  
Instrument micrOTOF-Q II 10337

## Acquisition Parameter

|             |            |                       |           |                  |           |
|-------------|------------|-----------------------|-----------|------------------|-----------|
| Source Type | ESI        | Ion Polarity          | Positive  | Set Nebulizer    | 0.4 Bar   |
| Focus       | Not active | Set Capillary         | 4500 V    | Set Dry Heater   | 180 °C    |
| Scan Begin  | 50 m/z     | Set End Plate Offset  | -500 V    | Set Dry Gas      | 4.0 l/min |
| Scan End    | 3000 m/z   | Set Collision Cell RF | 130.0 Vpp | Set Divert Valve | Waste     |

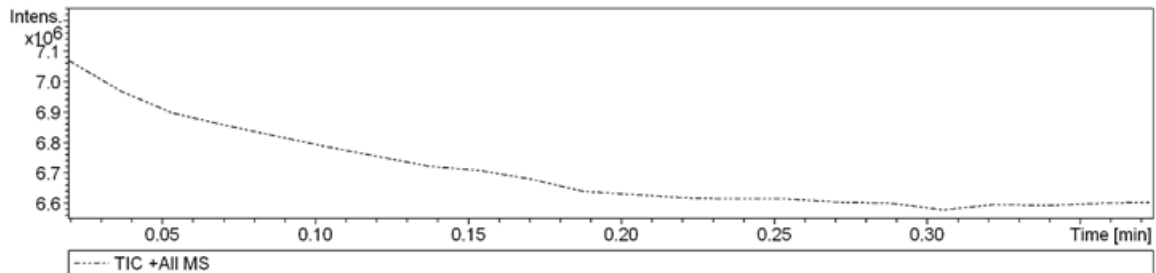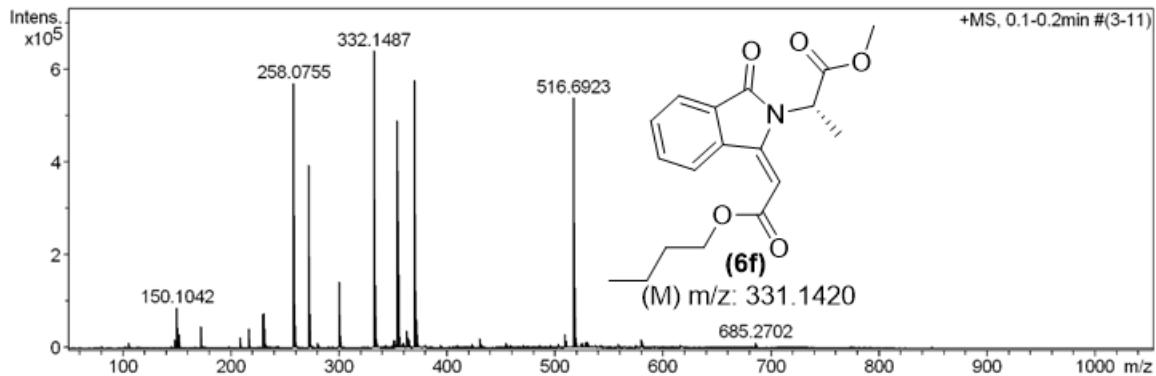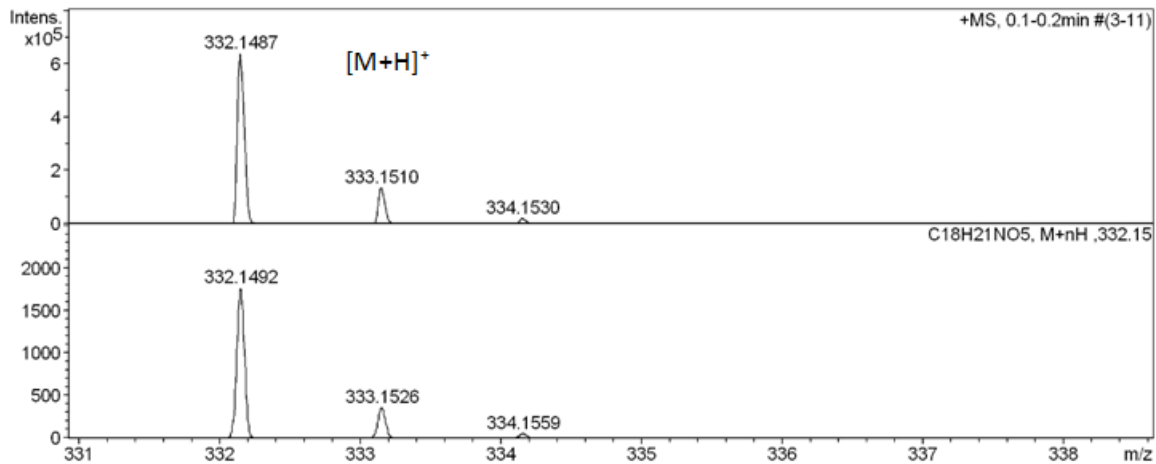

Figure. S16. ESI-HRMS spectra of indolinone **6f**

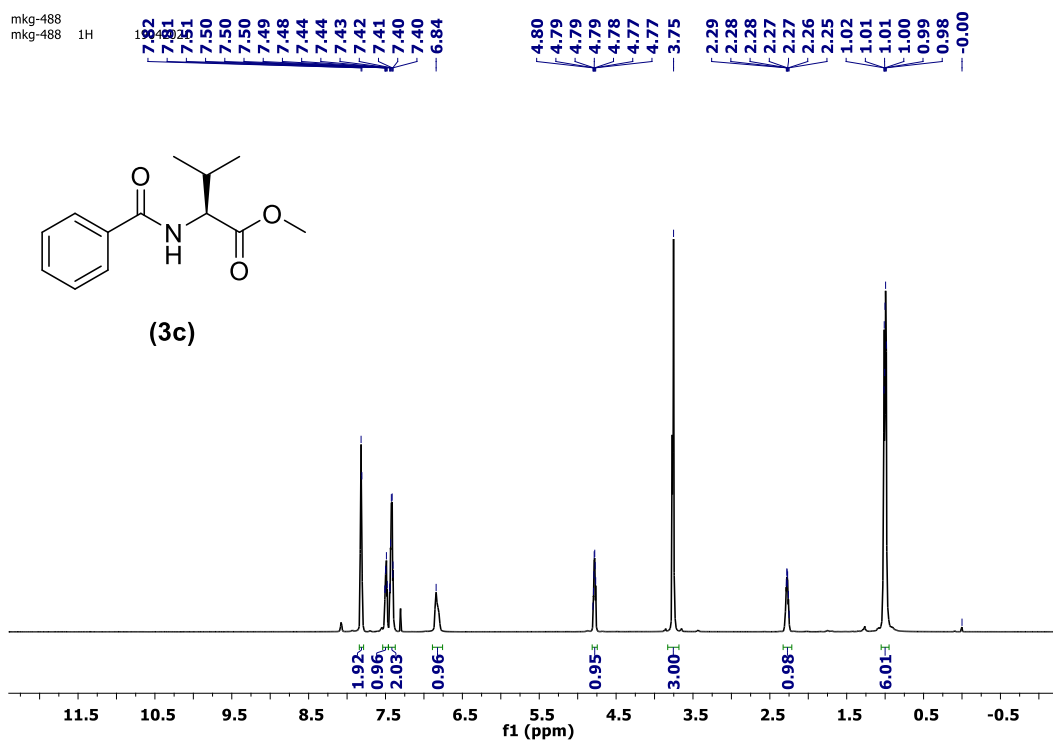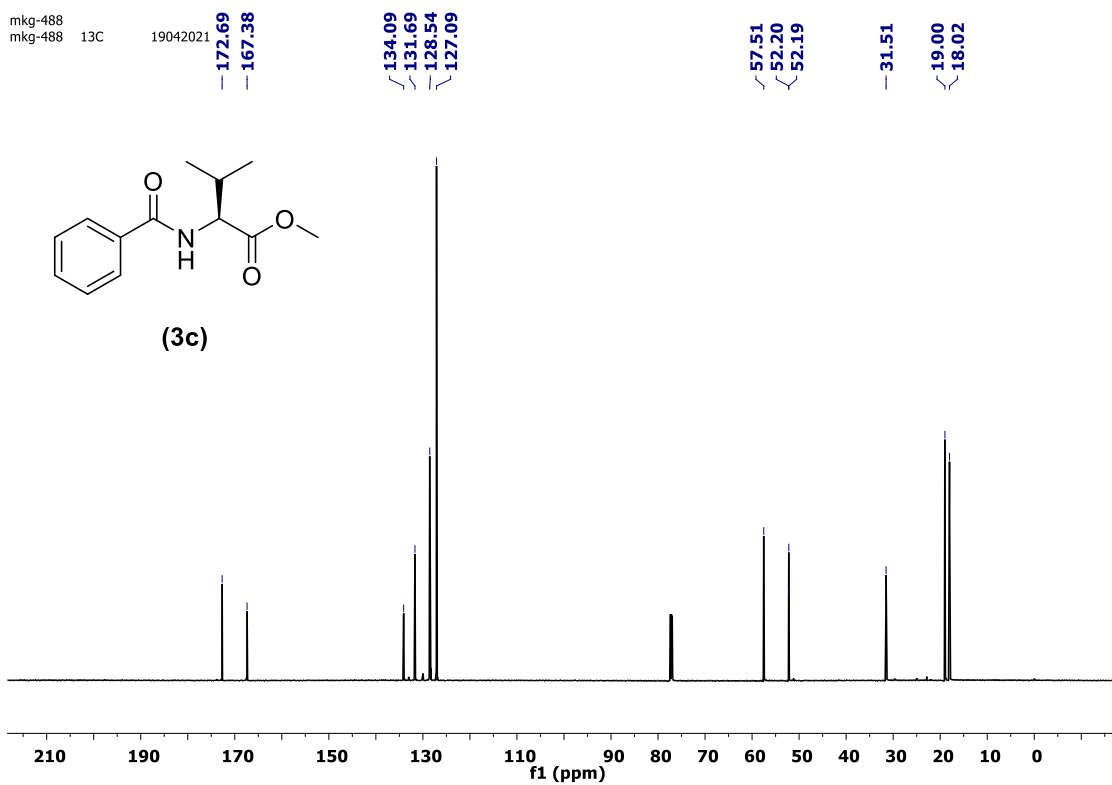

Figure. S17. <sup>1</sup>H, <sup>13</sup>C NMR spectra of benzamide 3c

# Display Report

## Analysis Info

Analysis Name D:\Data\JUN-2021\NKS\09062021\_NKS\_MKG\_488-VAL.d  
Method Pos\_tune\_low.m  
Sample Name Tmix-131118  
Comment

Acquisition Date 6/11/2021 8:15:17 PM

Operator Amit S.Sahu  
Instrument micrOTOF-Q II 10337

## Acquisition Parameter

|             |            |                       |           |                  |           |
|-------------|------------|-----------------------|-----------|------------------|-----------|
| Source Type | ESI        | Ion Polarity          | Positive  | Set Nebulizer    | 0.4 Bar   |
| Focus       | Not active | Set Capillary         | 4500 V    | Set Dry Heater   | 180 °C    |
| Scan Begin  | 50 m/z     | Set End Plate Offset  | -500 V    | Set Dry Gas      | 4.0 l/min |
| Scan End    | 3000 m/z   | Set Collision Cell RF | 130.0 Vpp | Set Divert Valve | Waste     |

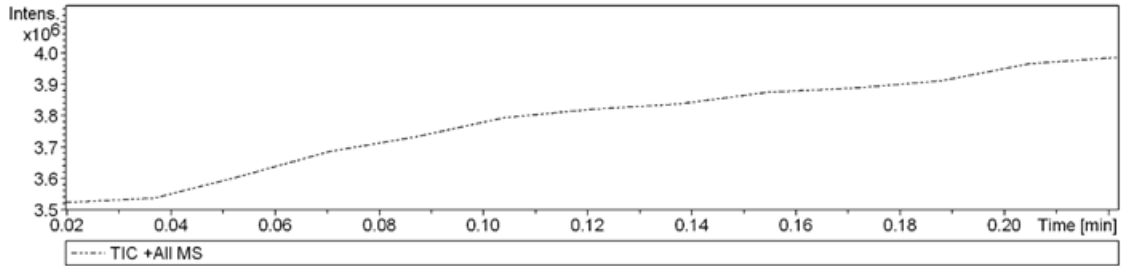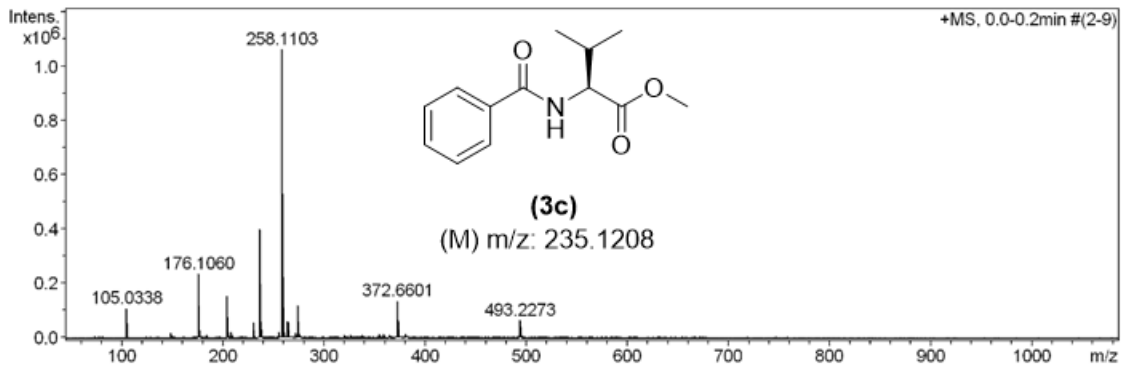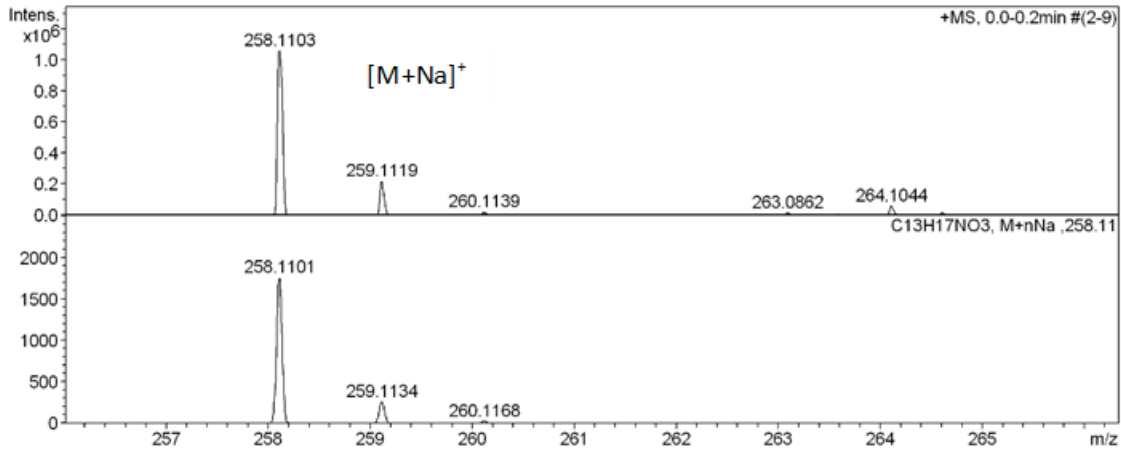

Figure. S18. ESI-HRMS spectra of benzamide 3c

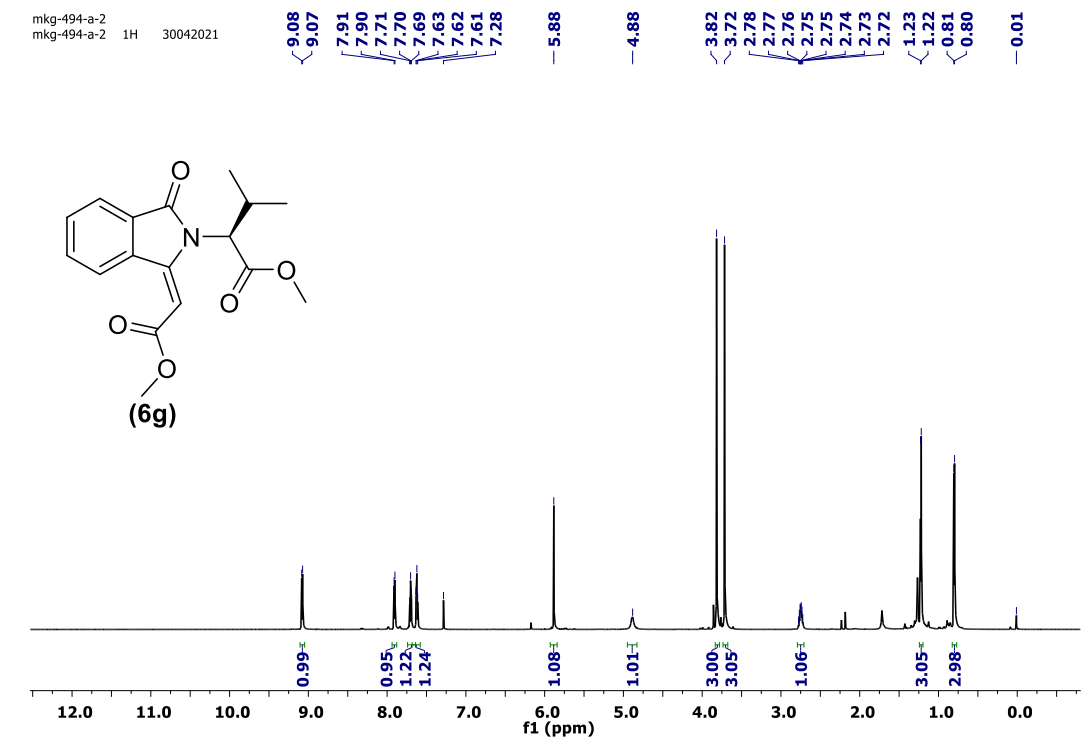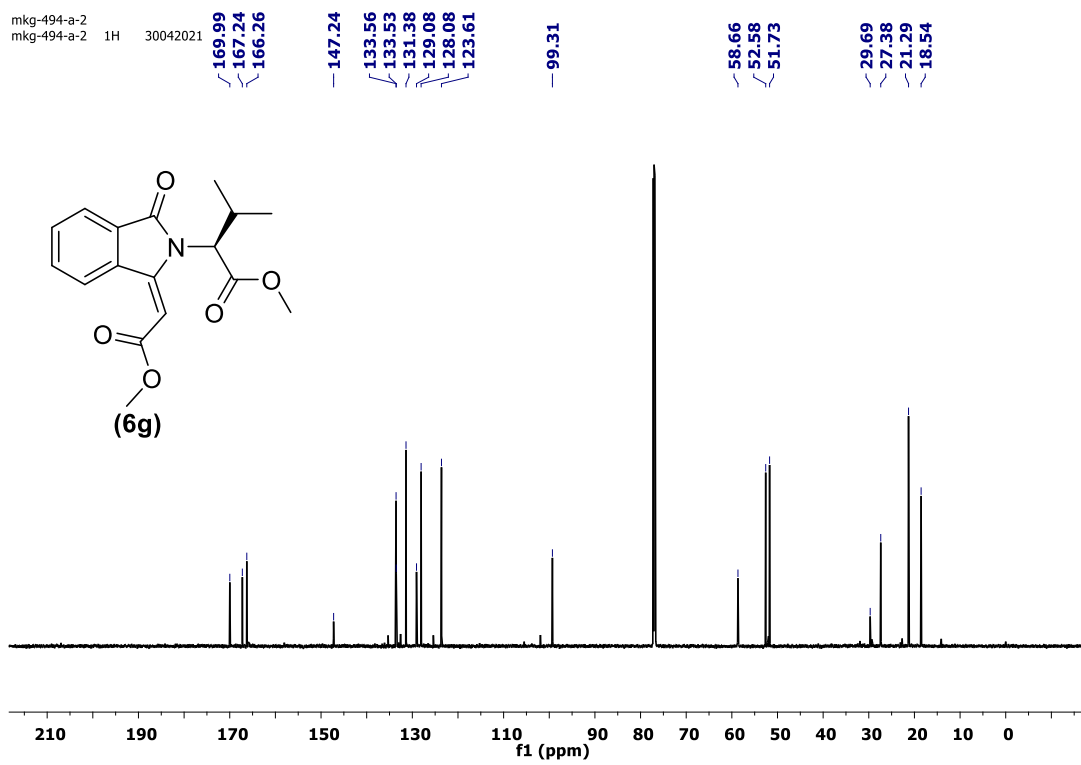

Figure. S19.  $^1\text{H}$ ,  $^{13}\text{C}$  NMR spectra of indolinone **6g**

# Display Report

## Analysis Info

Analysis Name D:\Data\JUN-2021\NKS\09062021\_NKS\_MKG\_494-A.d  
Method Pos\_tune\_low.m  
Sample Name Tmix-131118  
Comment

Acquisition Date 6/11/2021 8:19:25 PM

Operator Amit S.Sahu  
Instrument micrOTOF-Q II 10337

## Acquisition Parameter

|             |            |                       |           |                  |           |
|-------------|------------|-----------------------|-----------|------------------|-----------|
| Source Type | ESI        | Ion Polarity          | Positive  | Set Nebulizer    | 0.4 Bar   |
| Focus       | Not active | Set Capillary         | 4500 V    | Set Dry Heater   | 180 °C    |
| Scan Begin  | 50 m/z     | Set End Plate Offset  | -500 V    | Set Dry Gas      | 4.0 l/min |
| Scan End    | 3000 m/z   | Set Collision Cell RF | 130.0 Vpp | Set Divert Valve | Waste     |

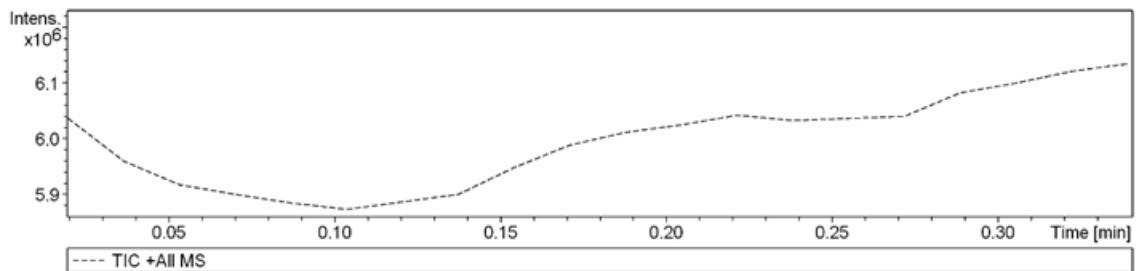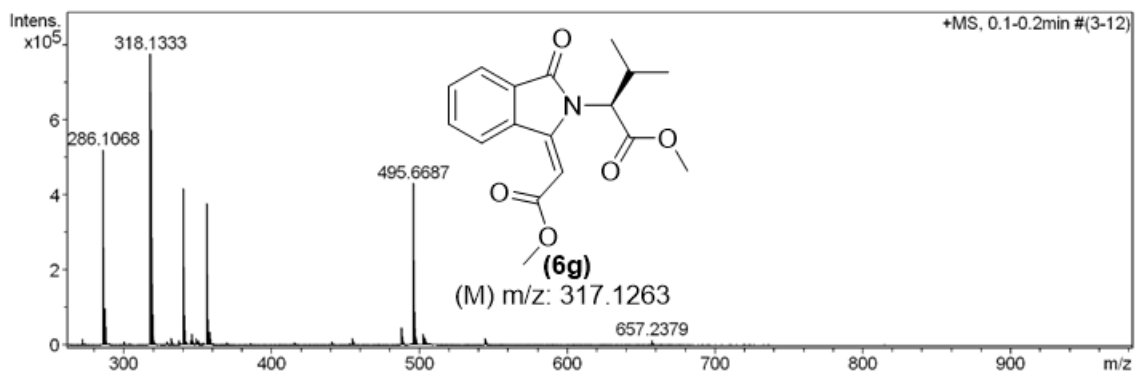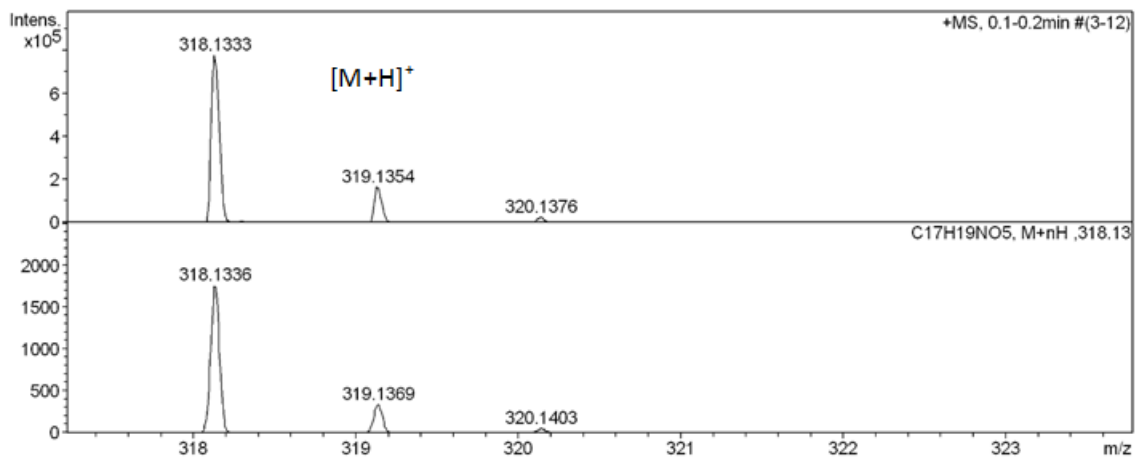

Figure. S20. ESI-HRMS spectra of indolinone **6g**

mkg-494-a  
mkg-494-a 1H 30042021

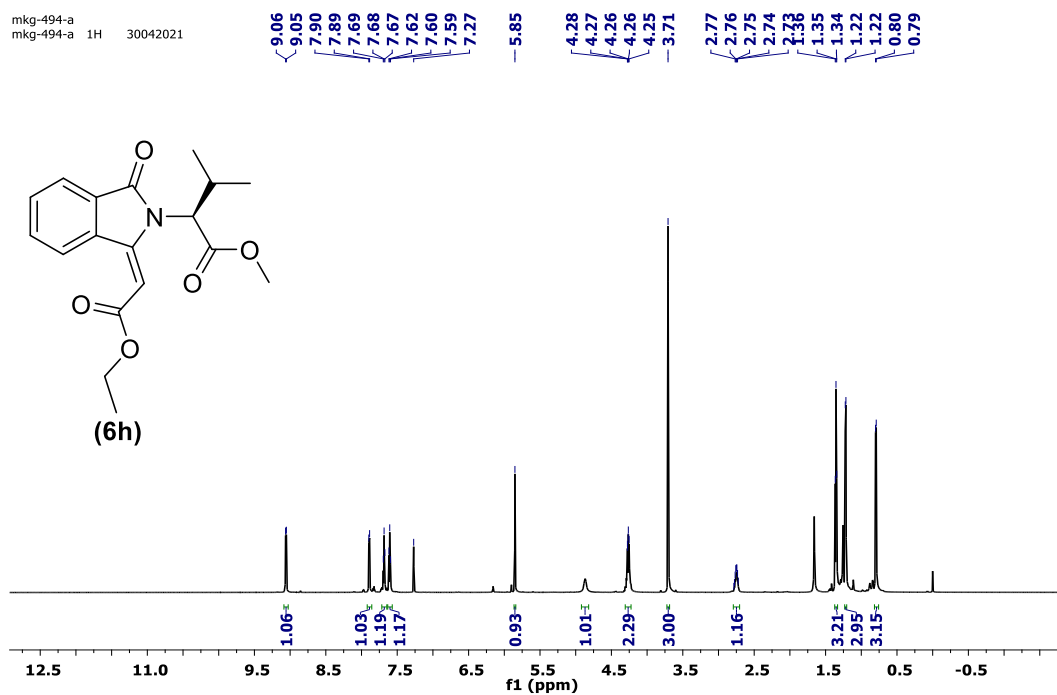

mkg-494-a  
mkg-494-a 1H 30042021

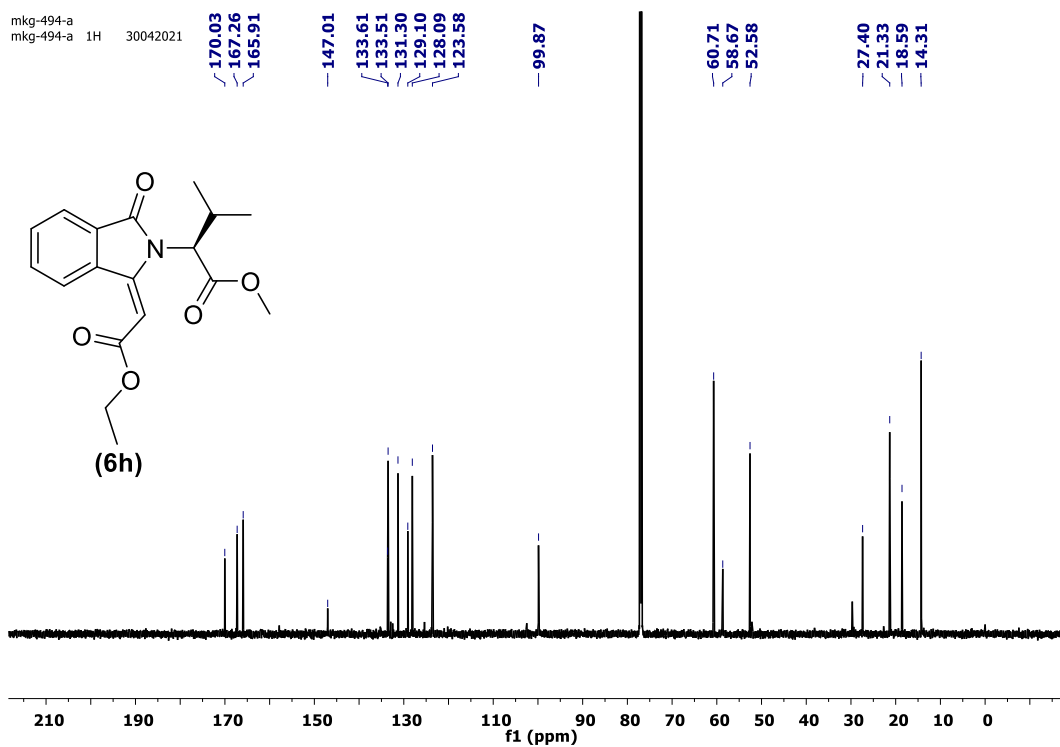

Figure. S21.  $^1\text{H}$ ,  $^{13}\text{C}$  NMR spectra of indolinone **6h**

## Display Report

### Analysis Info

Analysis Name D:\Data\JUN-2021\NKS\09062021\_NKS\_MKG\_494-B.d  
Method Pos\_tune\_low.m  
Sample Name Tmix-131118  
Comment

Acquisition Date 6/11/2021 8:23:26 PM

Operator Amit S.Sahu  
Instrument micrOTOF-Q II 10337

### Acquisition Parameter

|             |            |                       |           |                  |           |
|-------------|------------|-----------------------|-----------|------------------|-----------|
| Source Type | ESI        | Ion Polarity          | Positive  | Set Nebulizer    | 0.4 Bar   |
| Focus       | Not active | Set Capillary         | 4500 V    | Set Dry Heater   | 180 °C    |
| Scan Begin  | 50 m/z     | Set End Plate Offset  | -500 V    | Set Dry Gas      | 4.0 l/min |
| Scan End    | 3000 m/z   | Set Collision Cell RF | 130.0 Vpp | Set Divert Valve | Waste     |

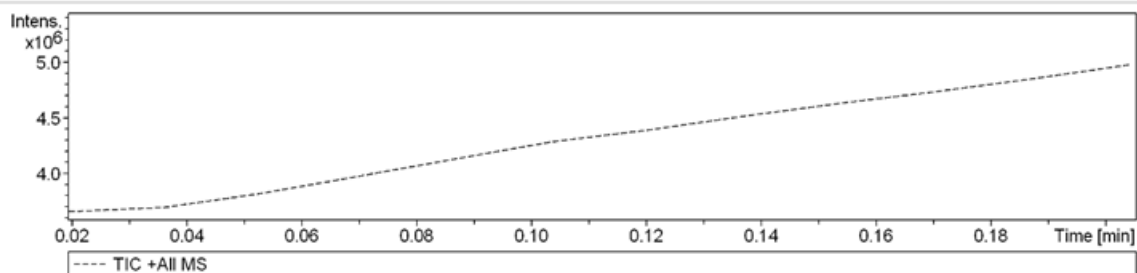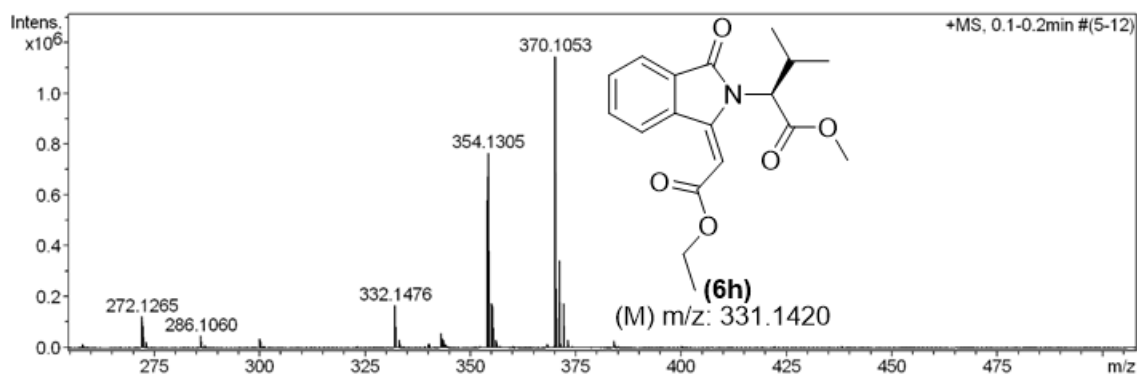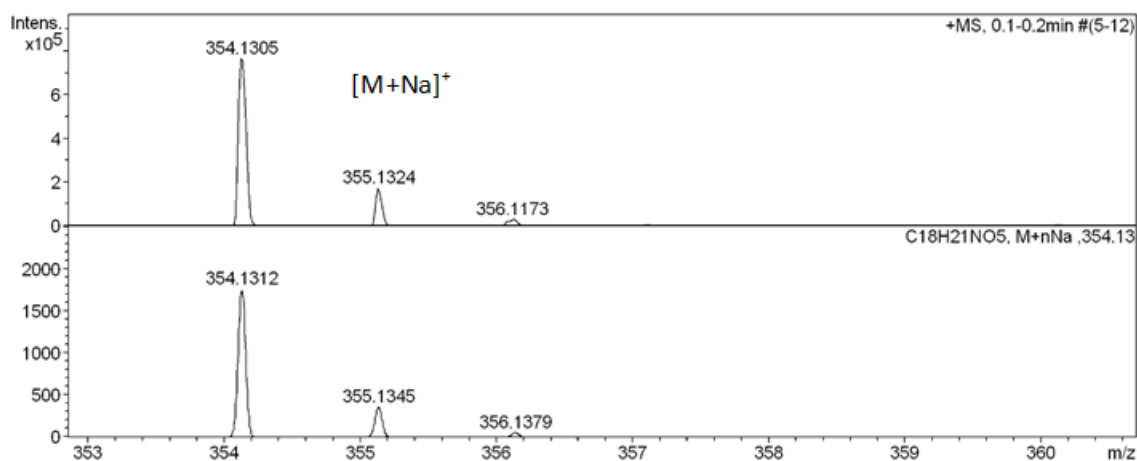

Figure. S22. ESI-HRMS spectra of indolinone **6h**

mkg-499a

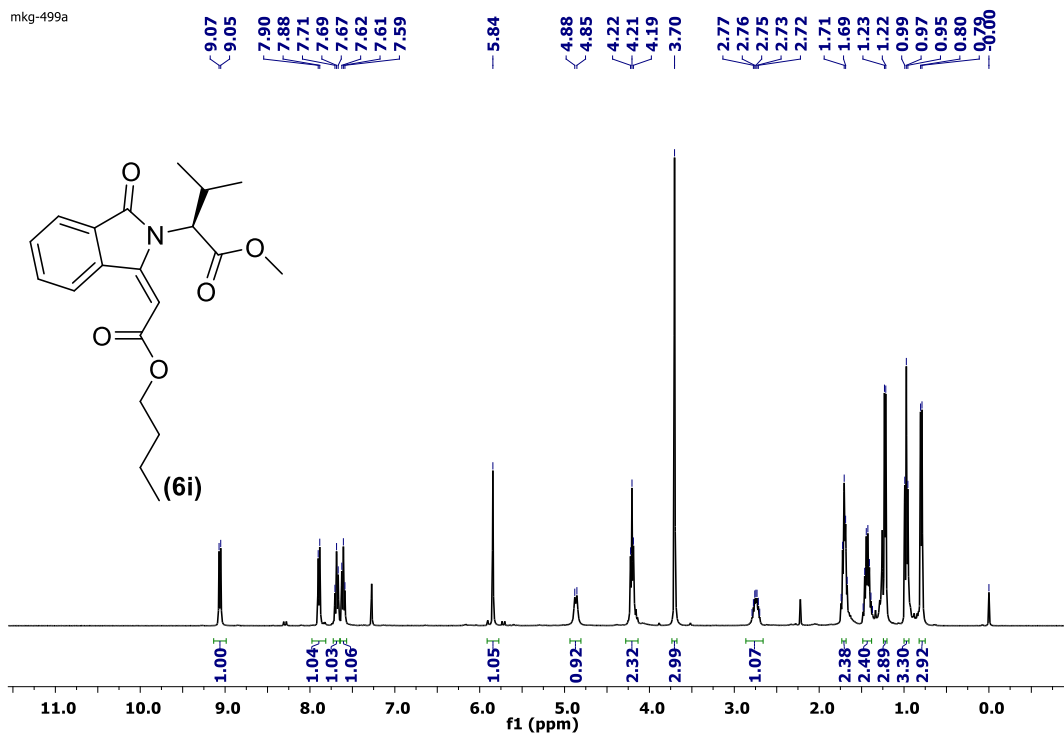

mkg-499a  
13c

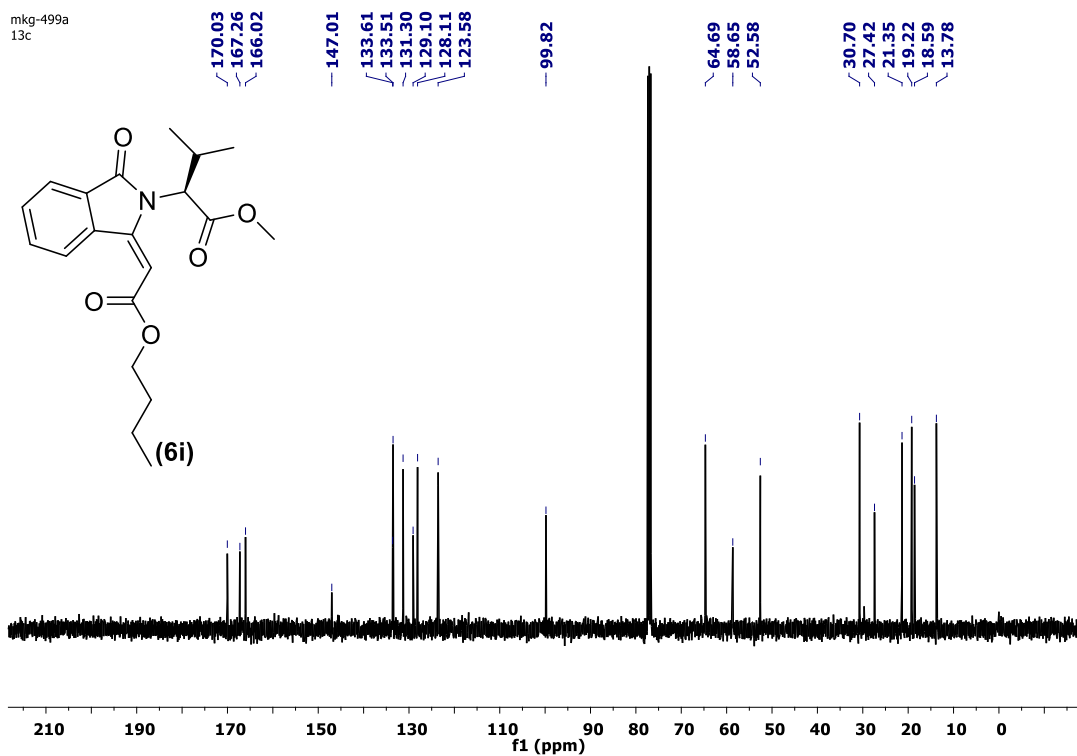

Figure. S23.  $^1\text{H}$ ,  $^{13}\text{C}$  NMR spectra of indolinone **6i**



# Display Report

## Analysis Info

Analysis Name D:\Data\JUN-2021\NKS\09062021\_NKS\_MKG\_499-A.d  
Method Pos\_tune\_low.m  
Sample Name Tmix-131118  
Comment

Acquisition Date 6/11/2021 8:27:31 PM

Operator Amit S.Sahu  
Instrument micrOTOF-Q II 10337

## Acquisition Parameter

|             |            |                       |           |                  |           |
|-------------|------------|-----------------------|-----------|------------------|-----------|
| Source Type | ESI        | Ion Polarity          | Positive  | Set Nebulizer    | 0.4 Bar   |
| Focus       | Not active | Set Capillary         | 4500 V    | Set Dry Heater   | 180 °C    |
| Scan Begin  | 50 m/z     | Set End Plate Offset  | -500 V    | Set Dry Gas      | 4.0 l/min |
| Scan End    | 3000 m/z   | Set Collision Cell RF | 130.0 Vpp | Set Divert Valve | Waste     |

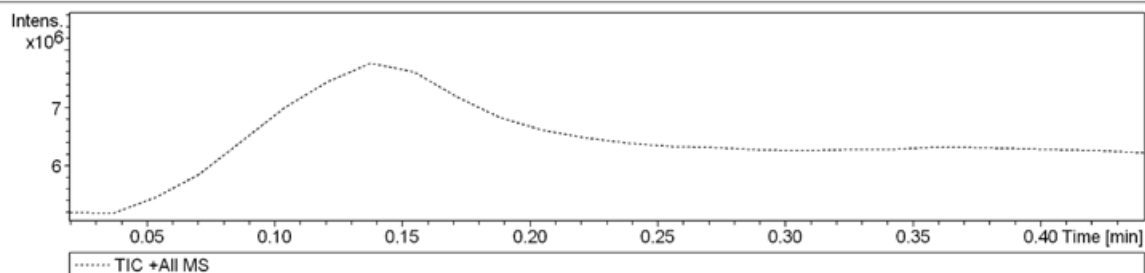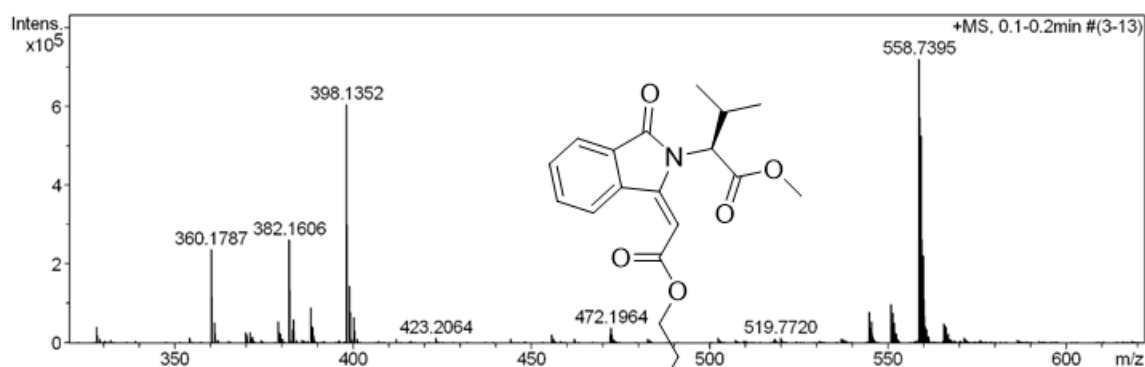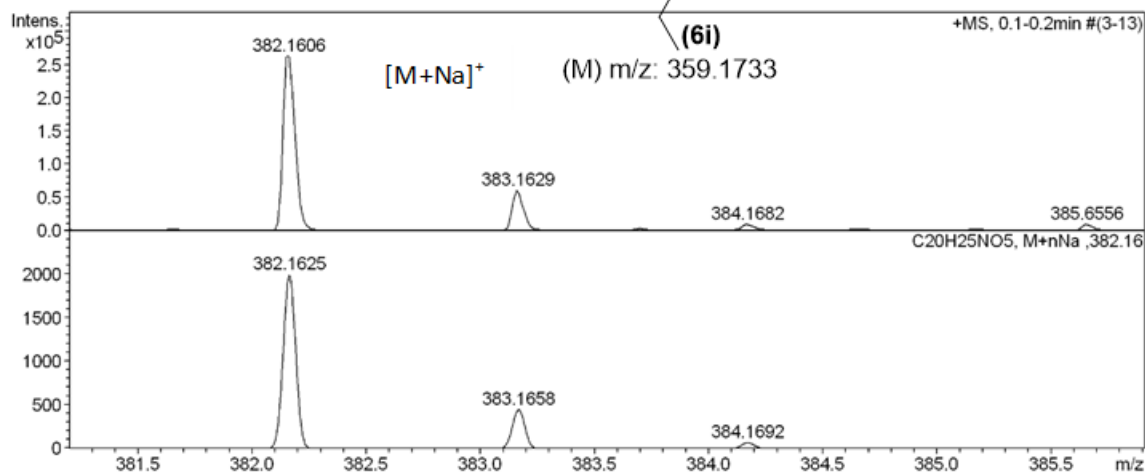

Figure. S24. ESI-HRMS spectra of indolinone **6i**

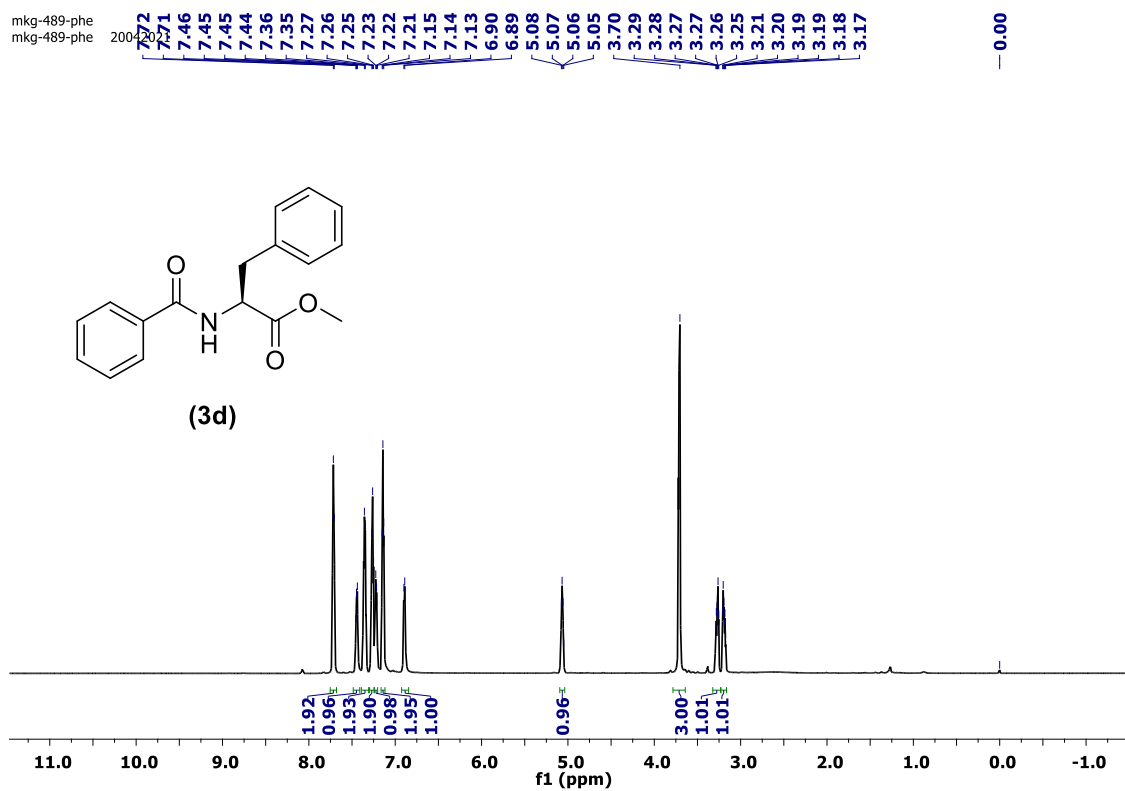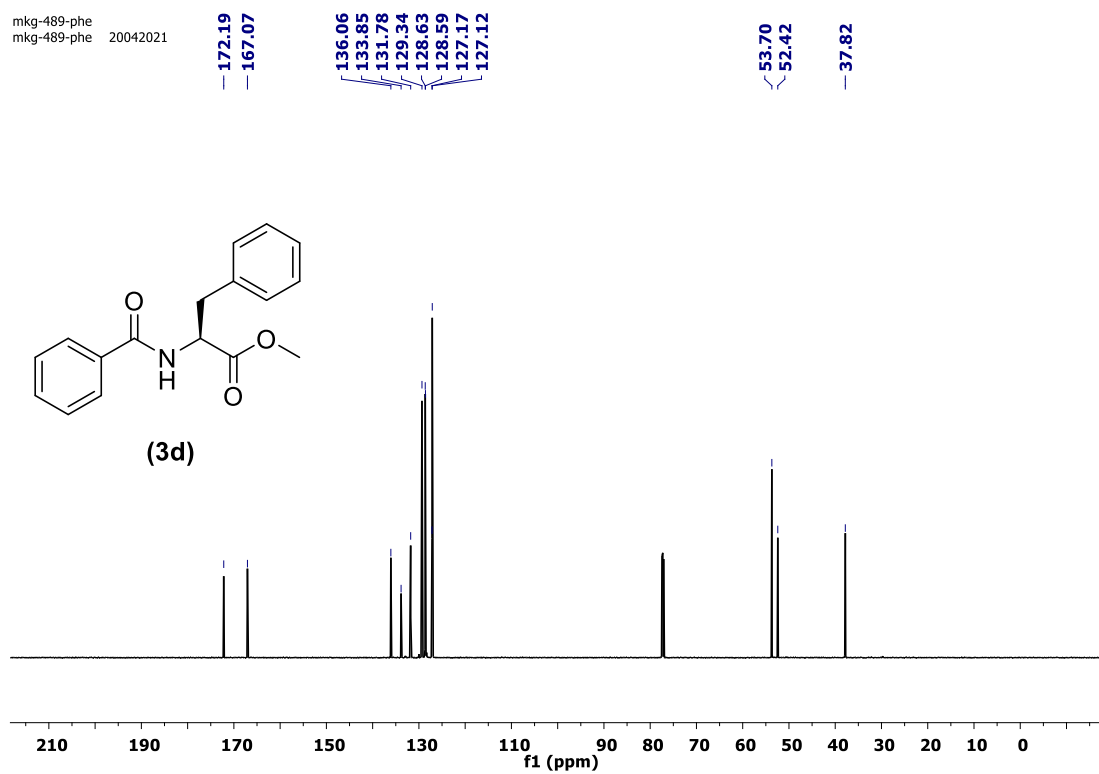

Figure. S25.  $^1\text{H}$ ,  $^{13}\text{C}$  NMR spectra of benzamide **3d**

## Display Report

### Analysis Info

Analysis Name D:\Data\JUN-2021\NKS\21062021\_NKS\_MKG\_489 PHEN.d  
Method Pos\_tune\_low.m  
Sample Name Tmix-131118  
Comment

Acquisition Date 6/21/2021 5:14:41 PM

Operator Amit S.Sahu  
Instrument micrOTOF-Q II 10337

### Acquisition Parameter

|             |            |                       |           |                  |           |
|-------------|------------|-----------------------|-----------|------------------|-----------|
| Source Type | ESI        | Ion Polarity          | Positive  | Set Nebulizer    | 0.4 Bar   |
| Focus       | Not active | Set Capillary         | 4500 V    | Set Dry Heater   | 180 °C    |
| Scan Begin  | 50 m/z     | Set End Plate Offset  | -500 V    | Set Dry Gas      | 4.0 l/min |
| Scan End    | 3000 m/z   | Set Collision Cell RF | 130.0 Vpp | Set Divert Valve | Waste     |

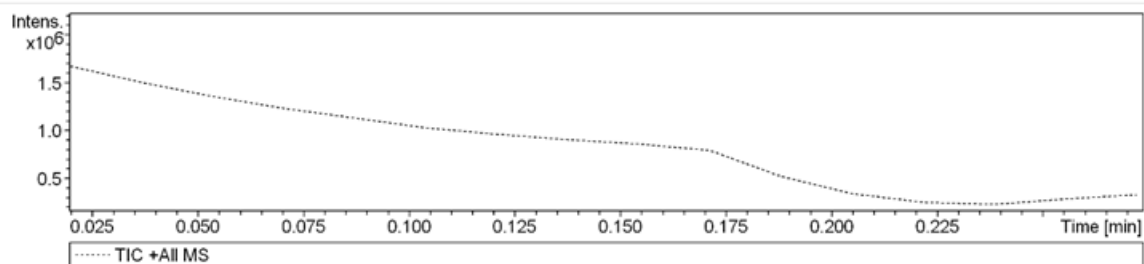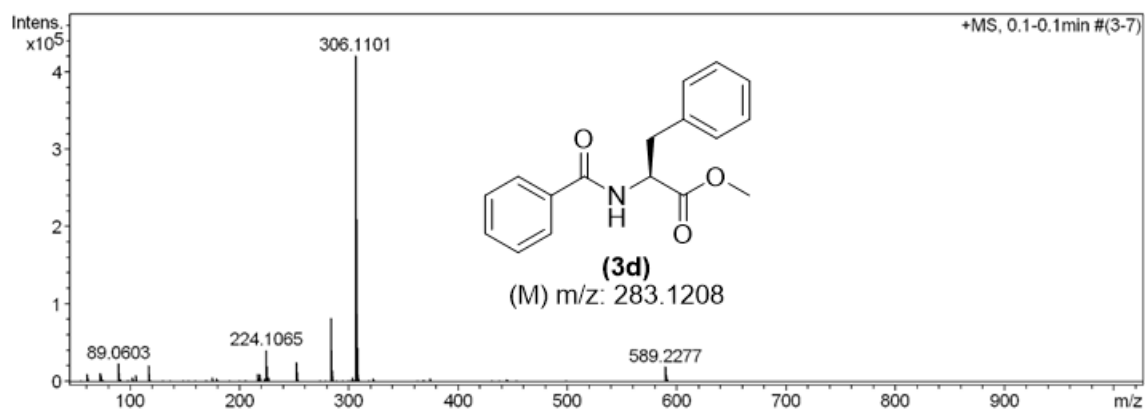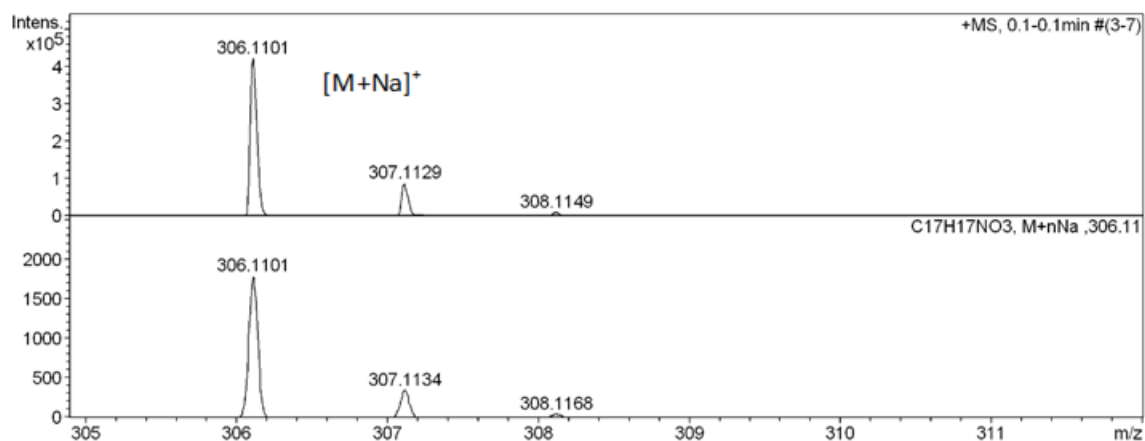

Figure. S26. ESI-HRMS spectra of benzamide **3d**

mkg-497a

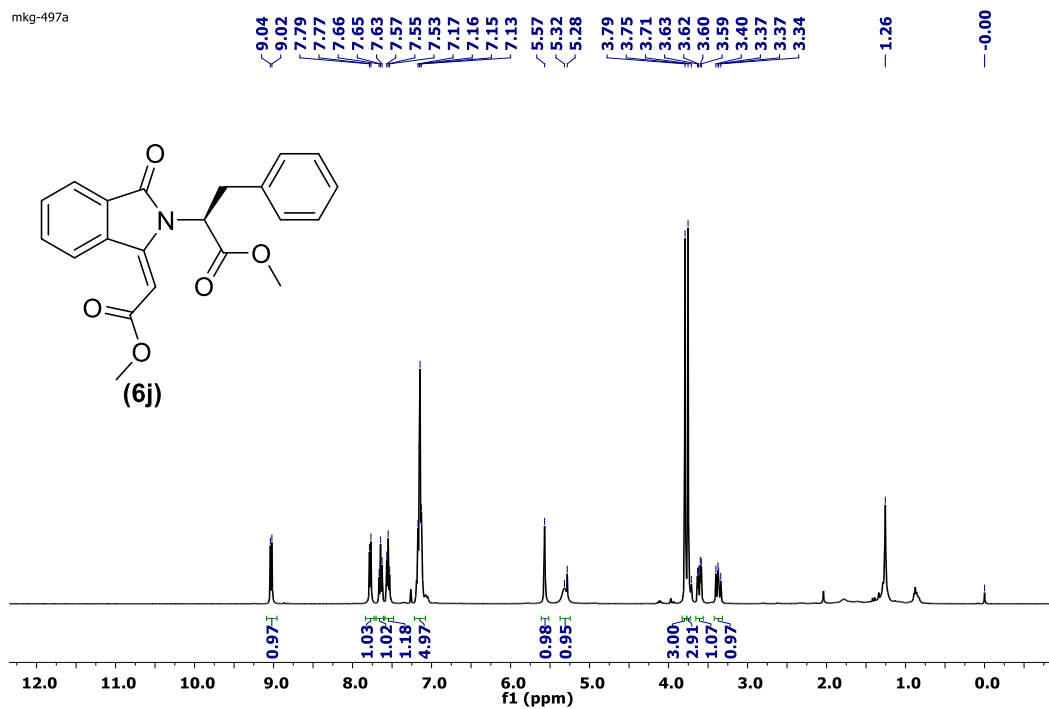

mkg-497a  
13C

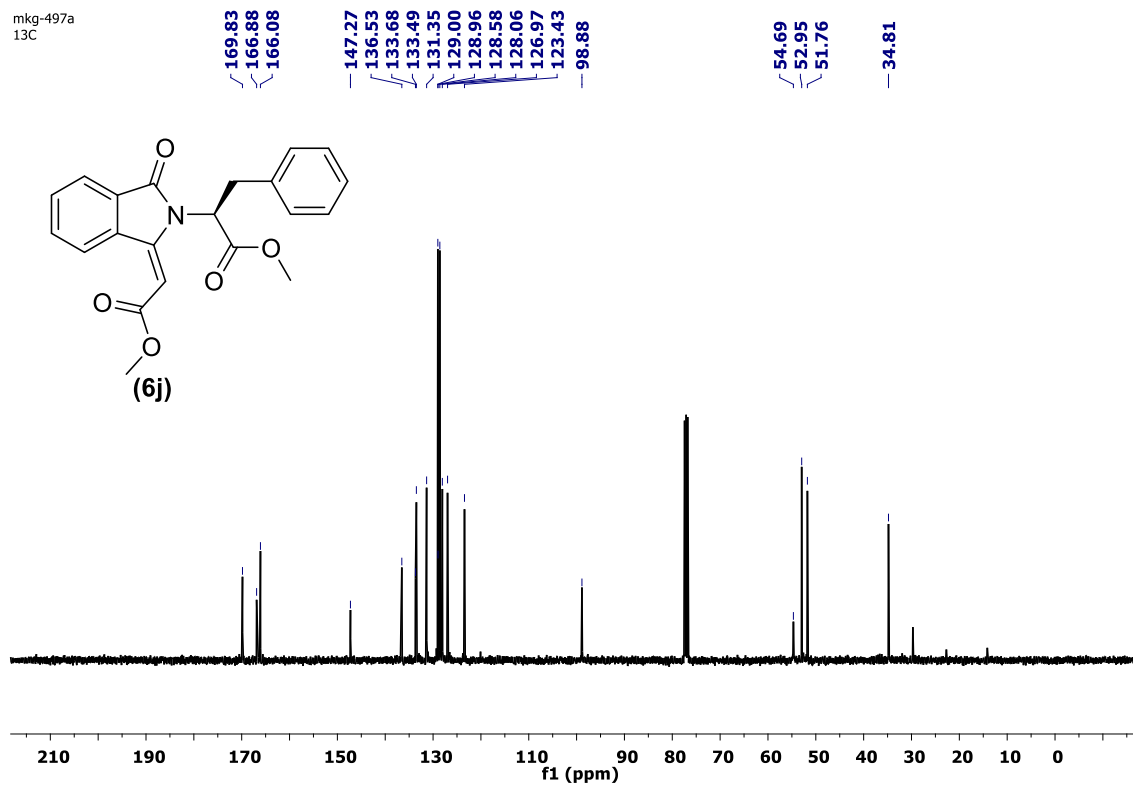

Figure. S27. <sup>1</sup>H, <sup>13</sup>C NMR spectra of indolinone **6j**

# Display Report

## Analysis Info

Analysis Name D:\Data\JUN-2021\NKS\21062021\_NKS\_MKG\_497A.d  
Method Pos\_tune\_low.m  
Sample Name Tmix-131118  
Comment

Acquisition Date 6/21/2021 5:17:27 PM

Operator Amit S.Sahu  
Instrument micrOTOF-Q II 10337

## Acquisition Parameter

|             |            |                       |           |                  |           |
|-------------|------------|-----------------------|-----------|------------------|-----------|
| Source Type | ESI        | Ion Polarity          | Positive  | Set Nebulizer    | 0.4 Bar   |
| Focus       | Not active | Set Capillary         | 4500 V    | Set Dry Heater   | 180 °C    |
| Scan Begin  | 50 m/z     | Set End Plate Offset  | -500 V    | Set Dry Gas      | 4.0 l/min |
| Scan End    | 3000 m/z   | Set Collision Cell RF | 130.0 Vpp | Set Divert Valve | Waste     |

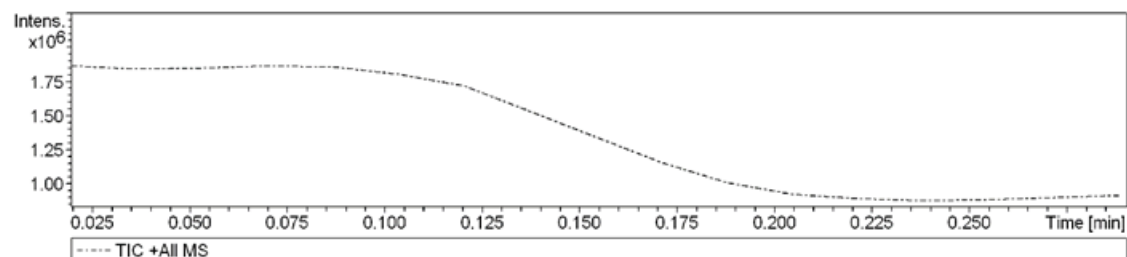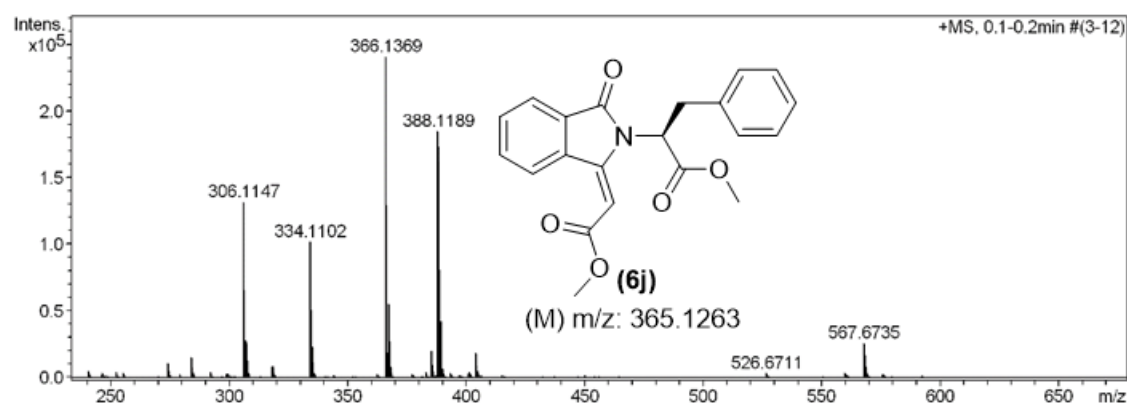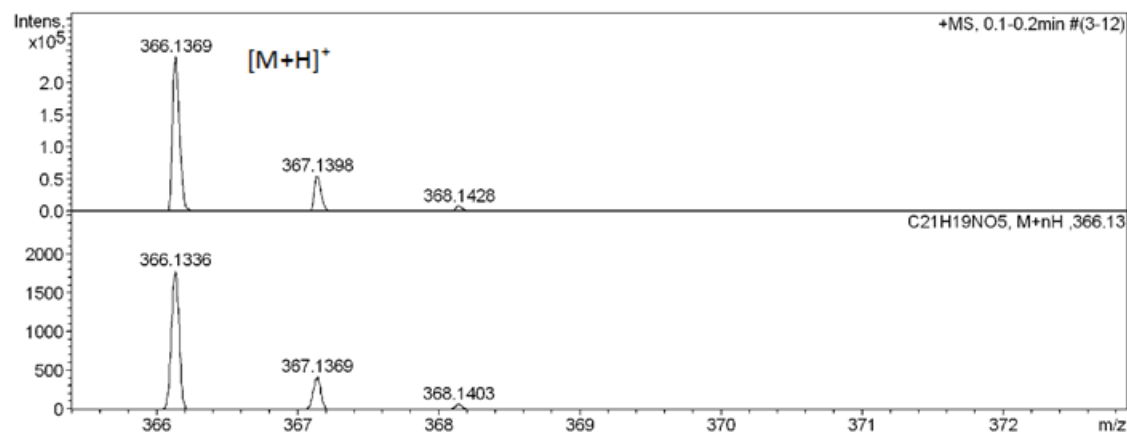

Figure. S28. ESI-HRMS spectra of indolinone 6j

mkg-497b  
1H

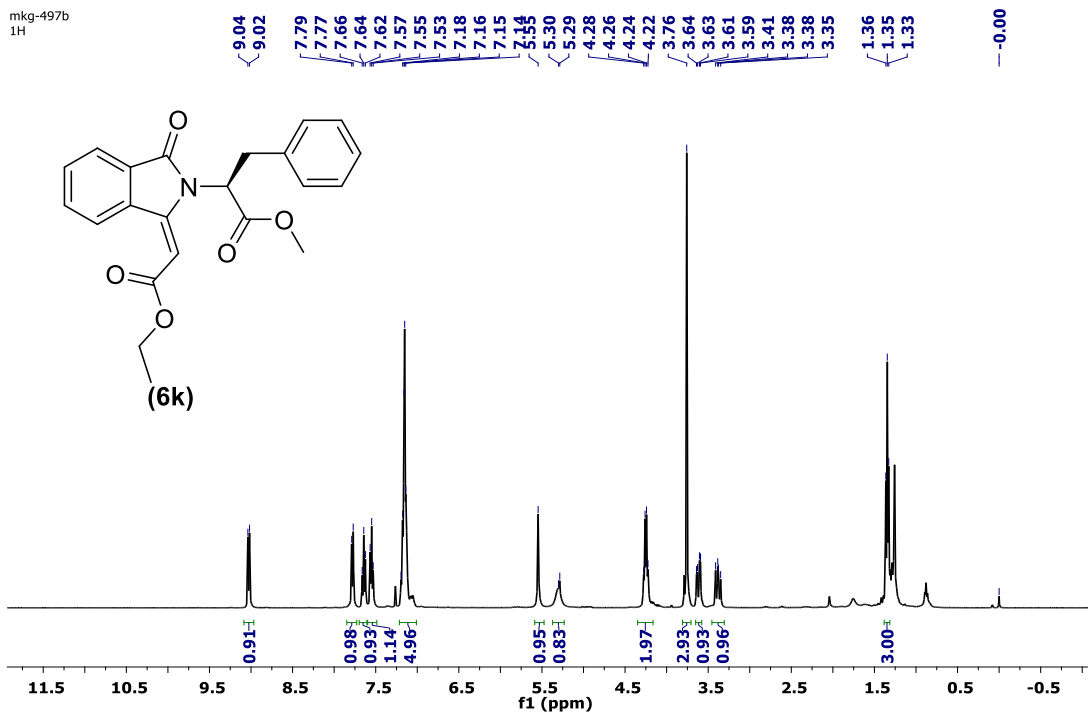

mkg-497b  
13C

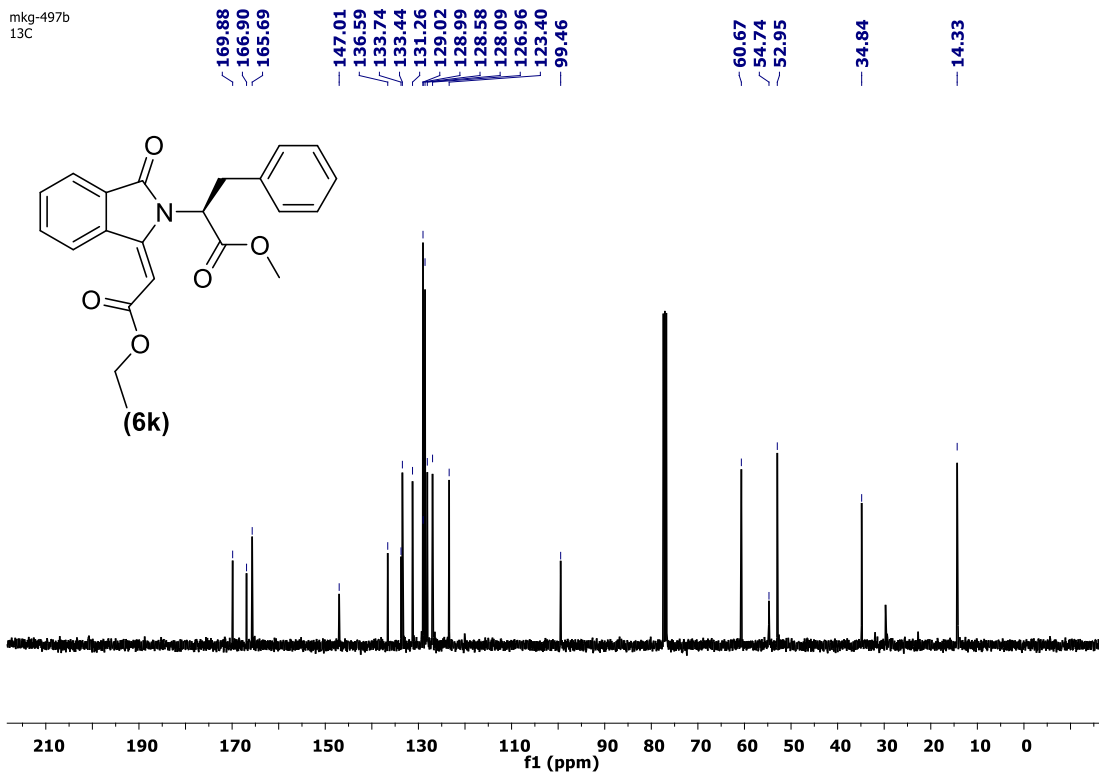

Figure. S29. <sup>1</sup>H, <sup>13</sup>C NMR spectra of indolinone **6k**

## Display Report

### Analysis Info

Analysis Name D:\Data\JUN-2021\NKS\21062021\_NKS\_MKG\_497B.d  
Method Pos\_tune\_low.m  
Sample Name Tmix-131118  
Comment

Acquisition Date 6/21/2021 5:20:21 PM

Operator Amit S.Sahu  
Instrument micrOTOF-Q II 10337

### Acquisition Parameter

|             |            |                       |           |                  |           |
|-------------|------------|-----------------------|-----------|------------------|-----------|
| Source Type | ESI        | Ion Polarity          | Positive  | Set Nebulizer    | 0.4 Bar   |
| Focus       | Not active | Set Capillary         | 4500 V    | Set Dry Heater   | 180 °C    |
| Scan Begin  | 50 m/z     | Set End Plate Offset  | -500 V    | Set Dry Gas      | 4.0 l/min |
| Scan End    | 3000 m/z   | Set Collision Cell RF | 130.0 Vpp | Set Divert Valve | Waste     |

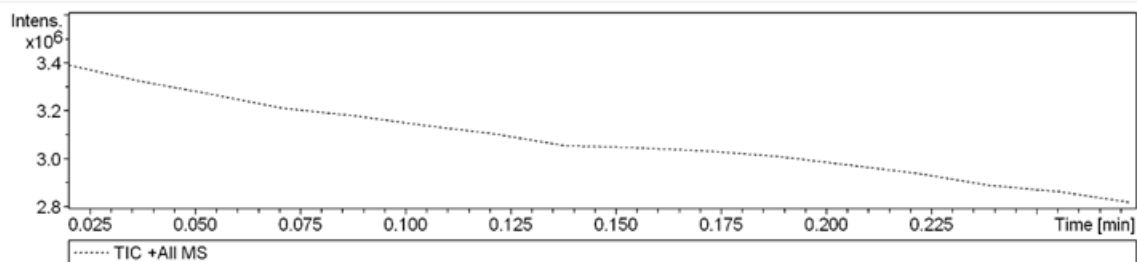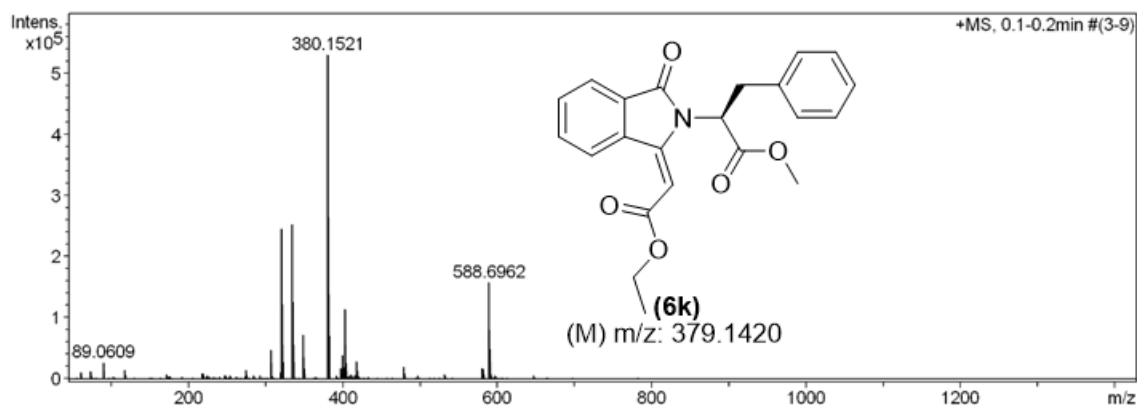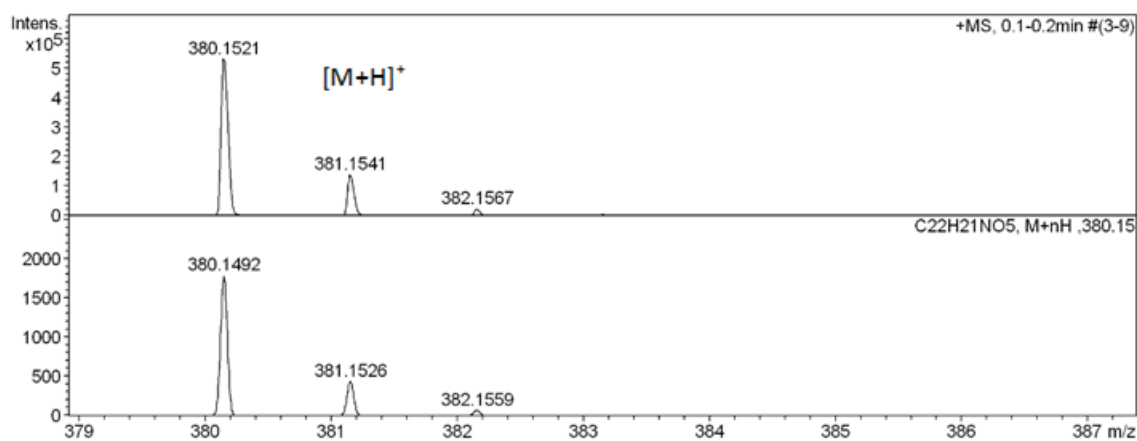

Figure. S30. ESI-HRMS spectra of indolinone **6k**

mkg-502

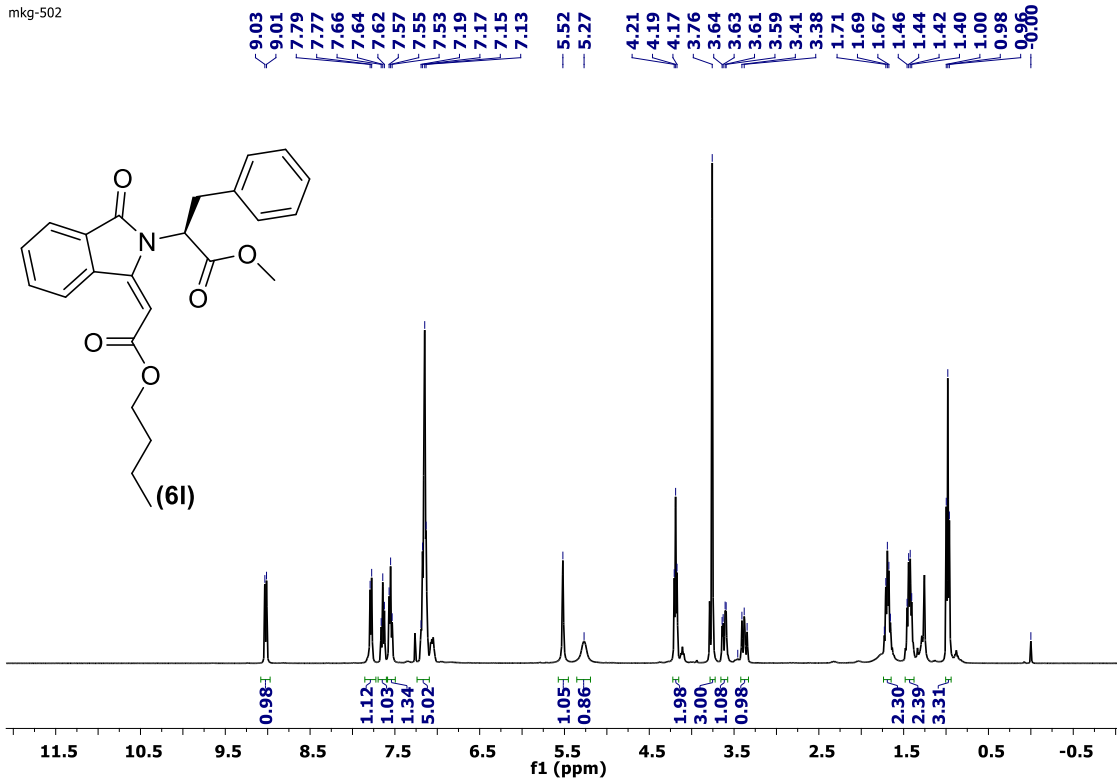

mkg-502  
<sup>13</sup>C

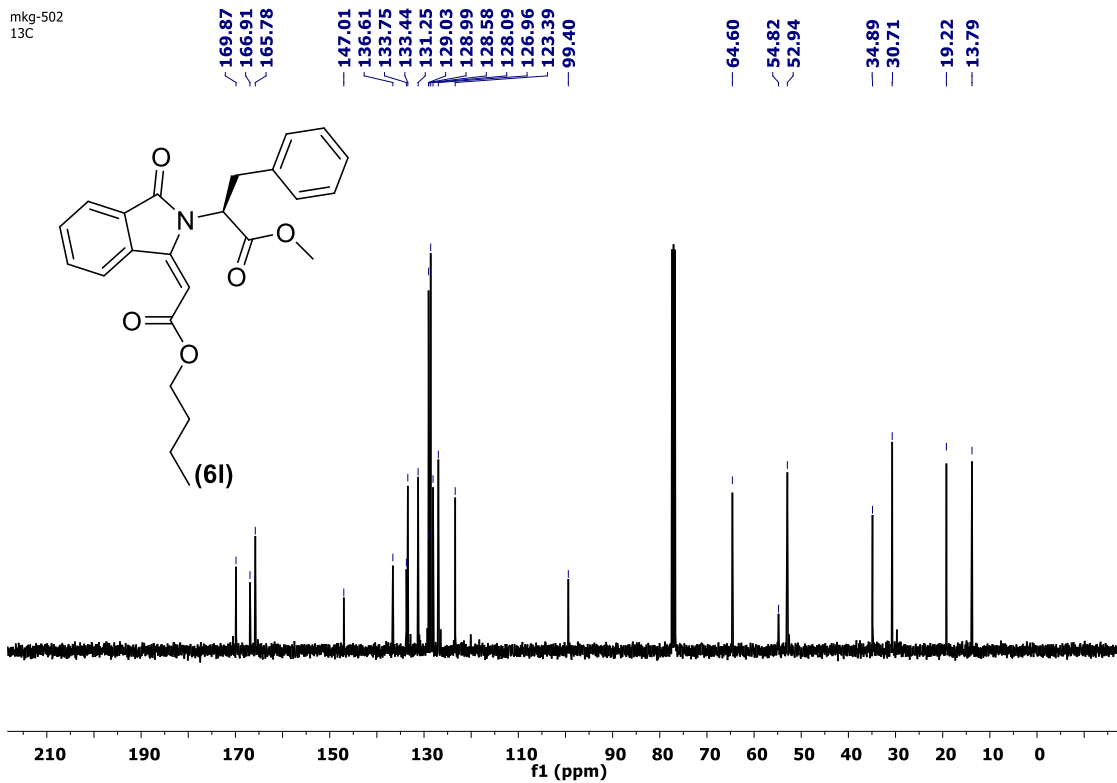

Figure. S31. <sup>1</sup>H, <sup>13</sup>C NMR spectra of indolinone **6l**



# Display Report

## Analysis Info

Analysis Name D:\Data\JUN-2021\NKS\21062021\_NKS\_MKG\_502.d  
Method Pos\_tune\_low.m  
Sample Name Tmix-131118  
Comment

Acquisition Date 6/21/2021 5:22:56 PM

Operator Amit S.Sahu  
Instrument micrOTOF-Q II 10337

## Acquisition Parameter

|             |            |                       |           |                  |           |
|-------------|------------|-----------------------|-----------|------------------|-----------|
| Source Type | ESI        | Ion Polarity          | Positive  | Set Nebulizer    | 0.4 Bar   |
| Focus       | Not active | Set Capillary         | 4500 V    | Set Dry Heater   | 180 °C    |
| Scan Begin  | 50 m/z     | Set End Plate Offset  | -500 V    | Set Dry Gas      | 4.0 l/min |
| Scan End    | 3000 m/z   | Set Collision Cell RF | 130.0 Vpp | Set Divert Valve | Waste     |

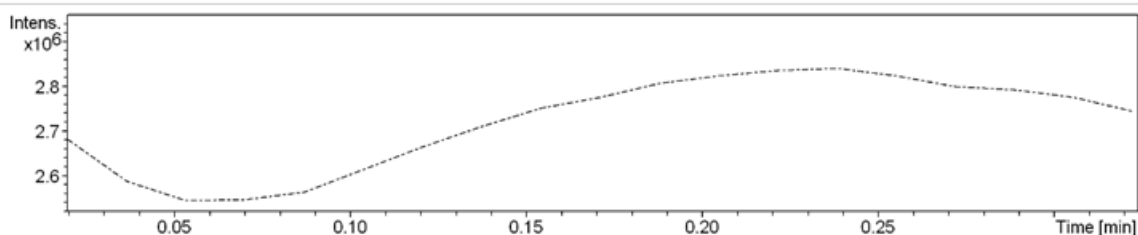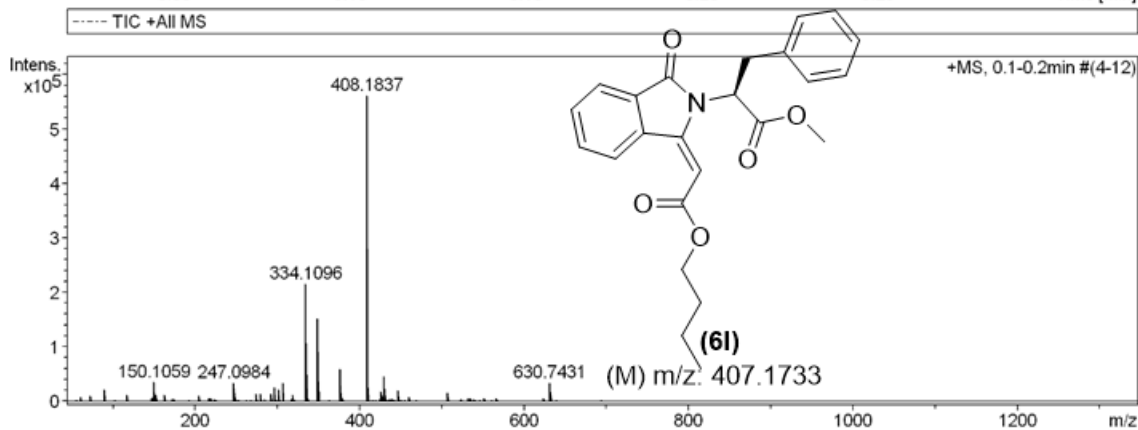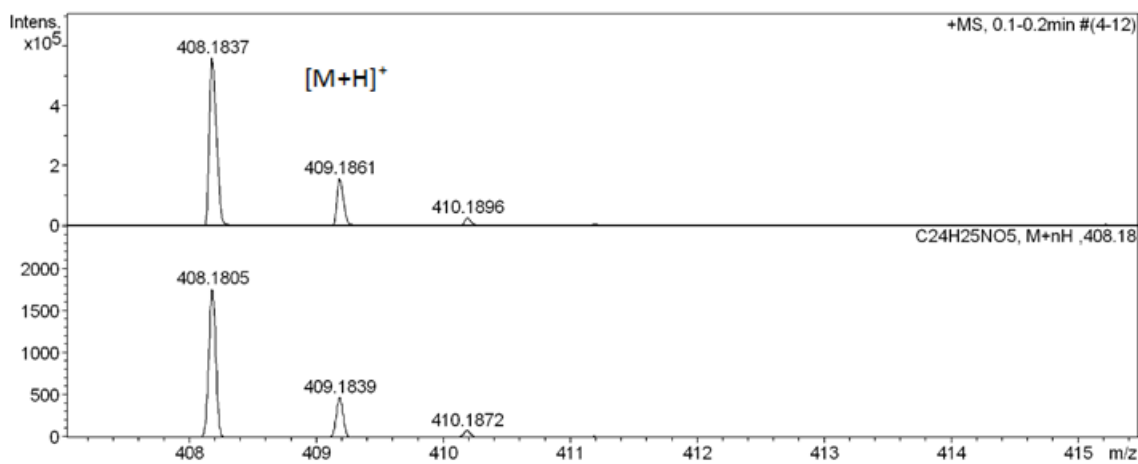

Figure. S32. ESI-HRMS spectra of indolinone **61**

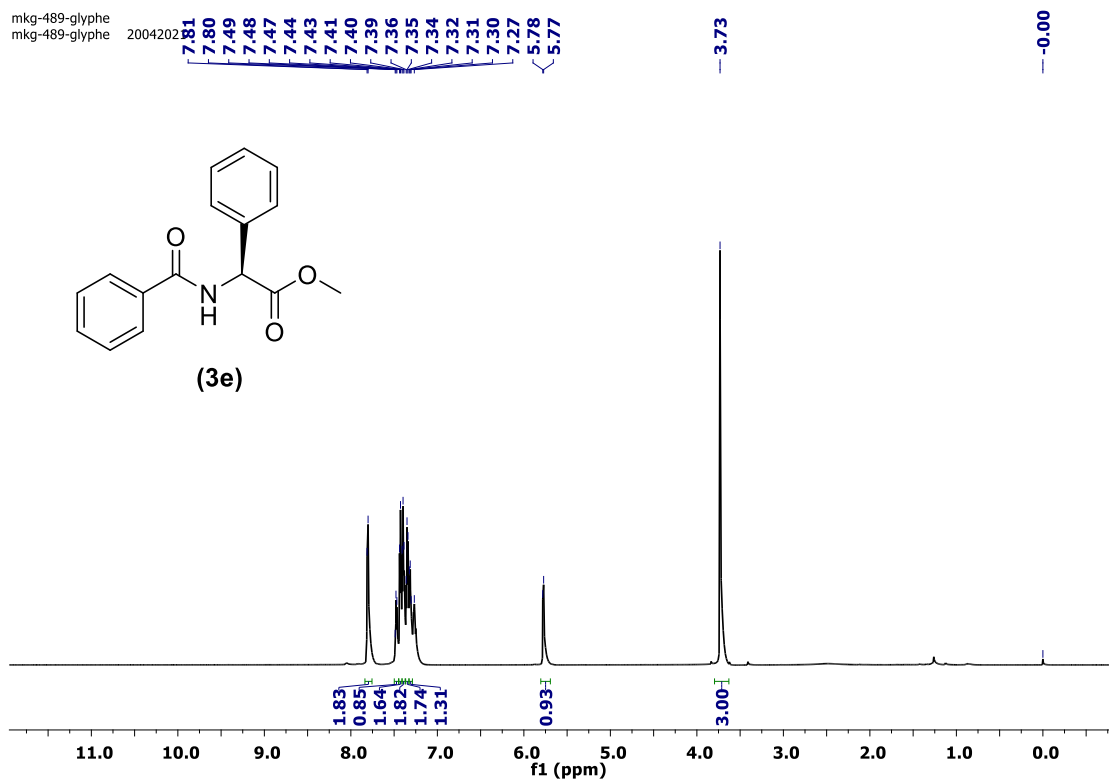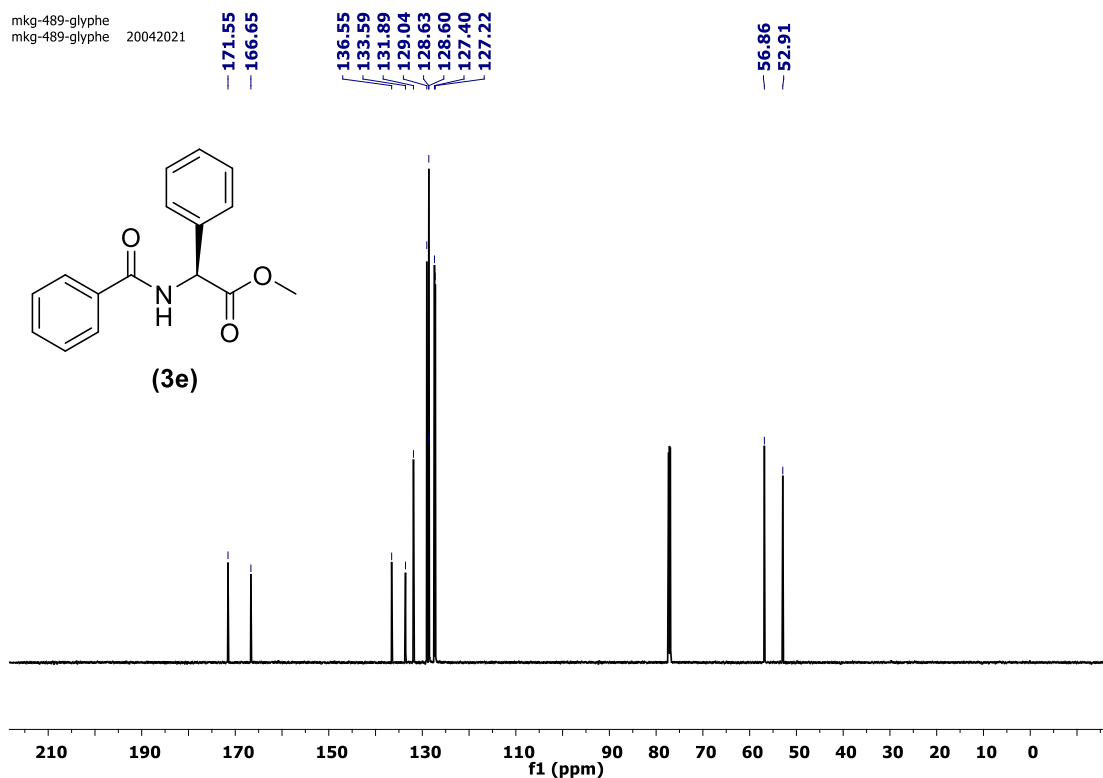

Figure. S33.  $^1\text{H}$ ,  $^{13}\text{C}$  NMR spectra of benzamide **3e**

# Display Report

## Analysis Info

Analysis Name D:\Data\JUN-2021\NKS\21062021\_NKS\_MKG\_489-PHE-GLY.d  
Method Pos\_tune\_low.m  
Sample Name Tmix-131118  
Comment

Acquisition Date 6/21/2021 5:25:54 PM  
Operator Amit S.Sahu  
Instrument micrOTOF-Q II 10337

## Acquisition Parameter

|             |            |                       |           |                  |           |
|-------------|------------|-----------------------|-----------|------------------|-----------|
| Source Type | ESI        | Ion Polarity          | Positive  | Set Nebulizer    | 0.4 Bar   |
| Focus       | Not active | Set Capillary         | 4500 V    | Set Dry Heater   | 180 °C    |
| Scan Begin  | 50 m/z     | Set End Plate Offset  | -500 V    | Set Dry Gas      | 4.0 l/min |
| Scan End    | 3000 m/z   | Set Collision Cell RF | 130.0 Vpp | Set Divert Valve | Waste     |

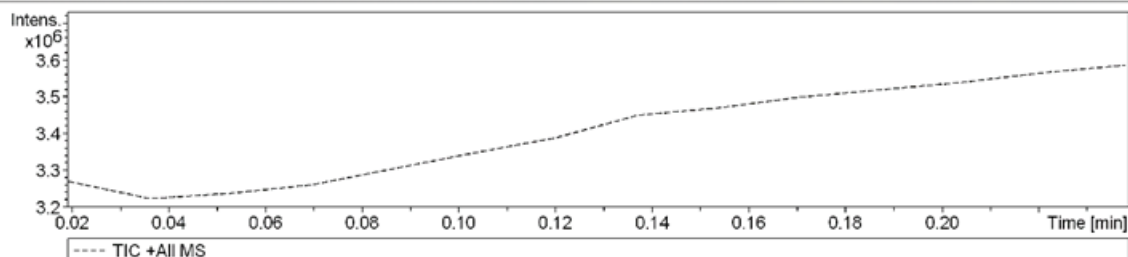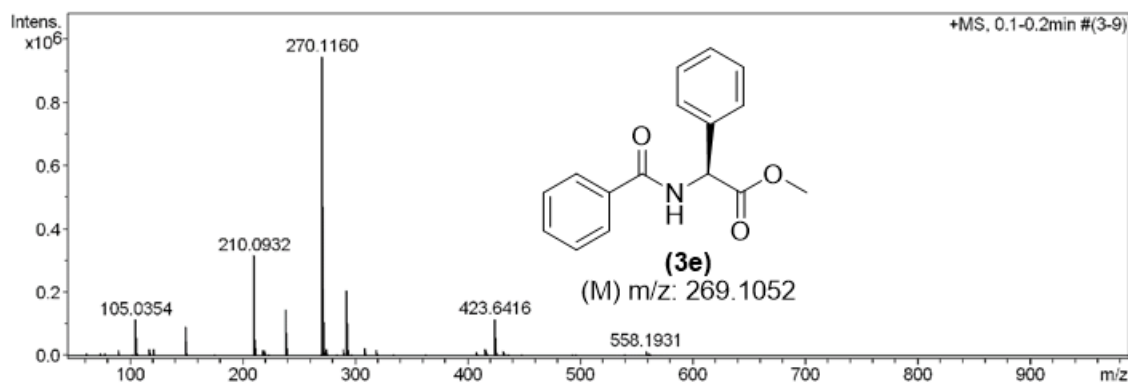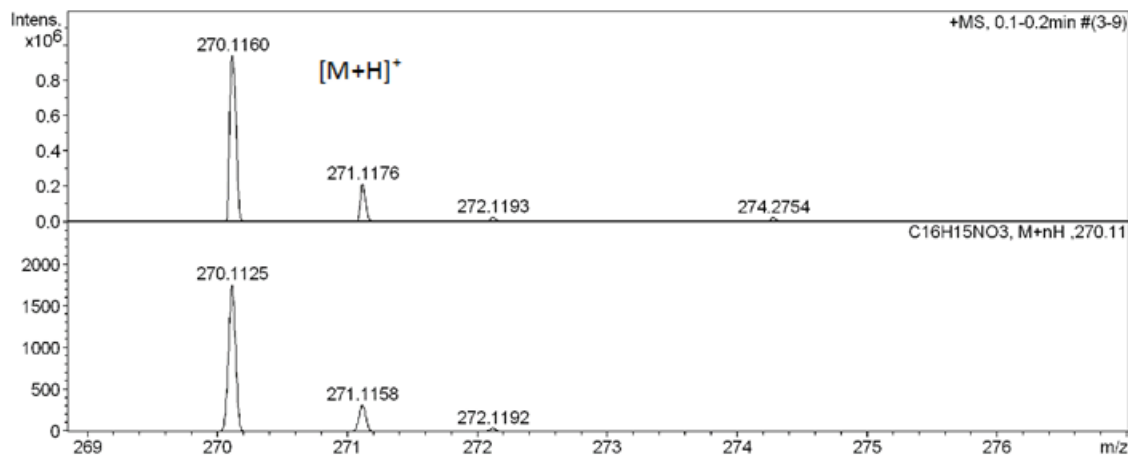

Figure. S34. ESI-HRMS spectra of benzamide **3e**

mkg 496 a  
mkg 496 a 1H

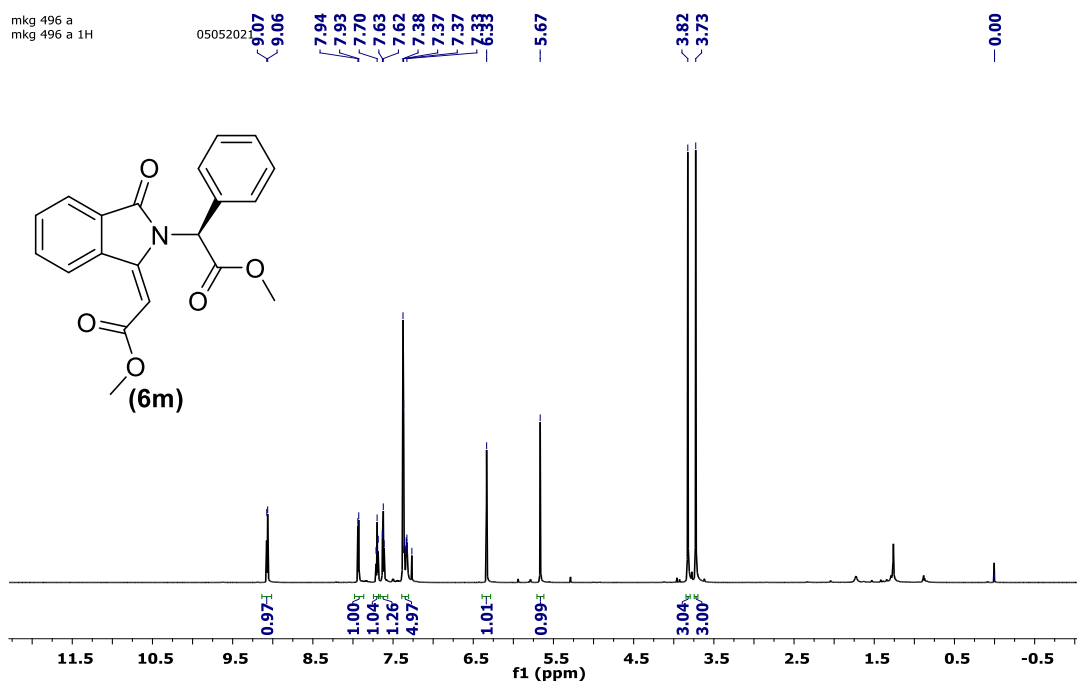

496a  
13C

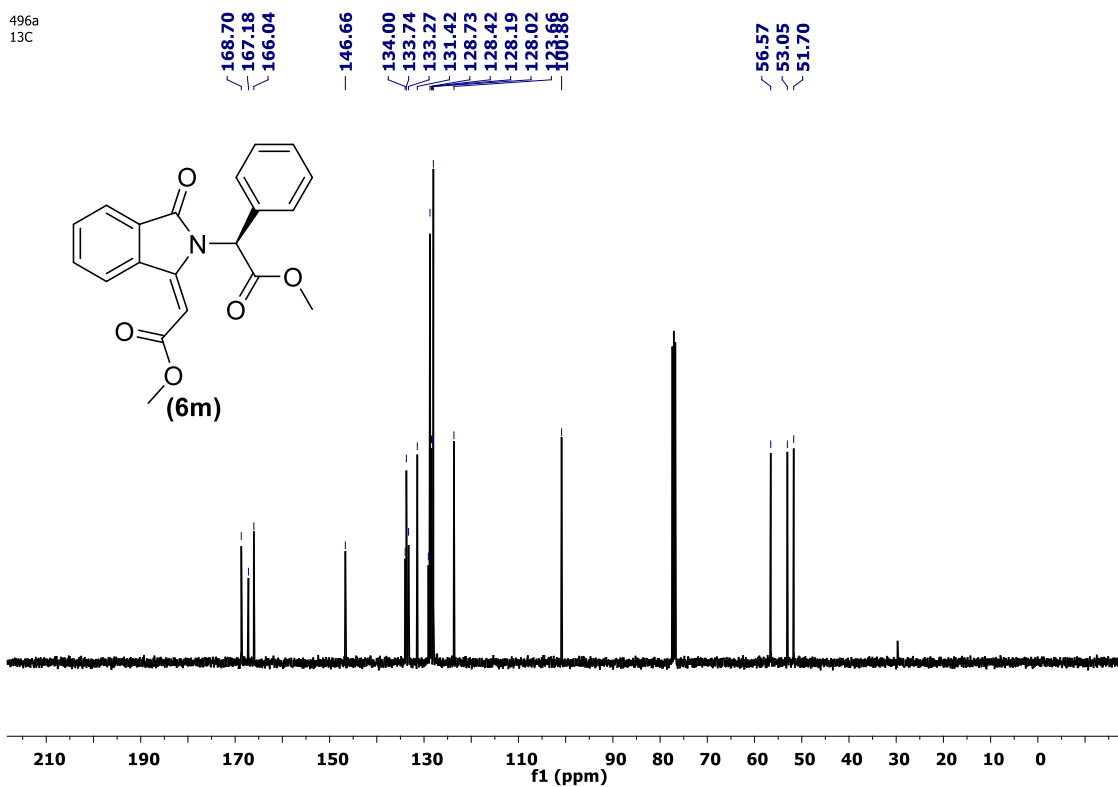

Figure. S35. <sup>1</sup>H, <sup>13</sup>C NMR spectra of indolinone **6m**

## Display Report

### Analysis Info

Analysis Name D:\Data\JUN-2021\NKS\21062021\_NKS\_MKG\_496A.d  
Method Pos\_tune\_low.m  
Sample Name Tmix-131118  
Comment

Acquisition Date 6/21/2021 5:32:38 PM

Operator Amit S.Sahu  
Instrument micrOTOF-Q II 10337

### Acquisition Parameter

|             |            |                       |           |                  |           |
|-------------|------------|-----------------------|-----------|------------------|-----------|
| Source Type | ESI        | Ion Polarity          | Positive  | Set Nebulizer    | 0.4 Bar   |
| Focus       | Not active | Set Capillary         | 4500 V    | Set Dry Heater   | 180 °C    |
| Scan Begin  | 50 m/z     | Set End Plate Offset  | -500 V    | Set Dry Gas      | 4.0 l/min |
| Scan End    | 3000 m/z   | Set Collision Cell RF | 130.0 Vpp | Set Divert Valve | Waste     |

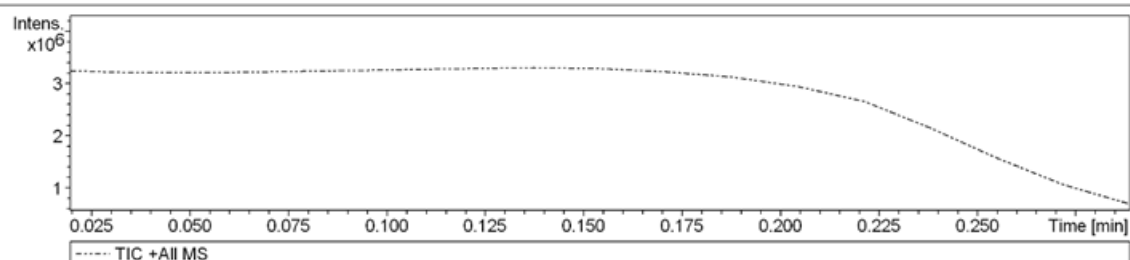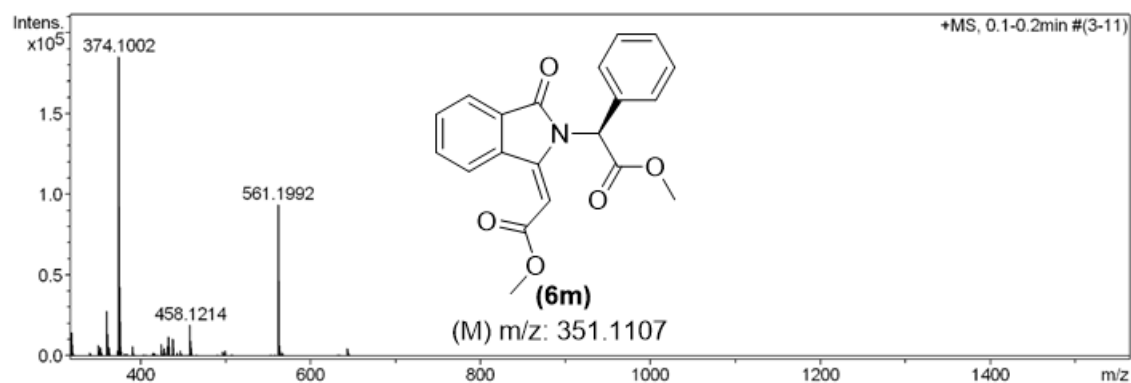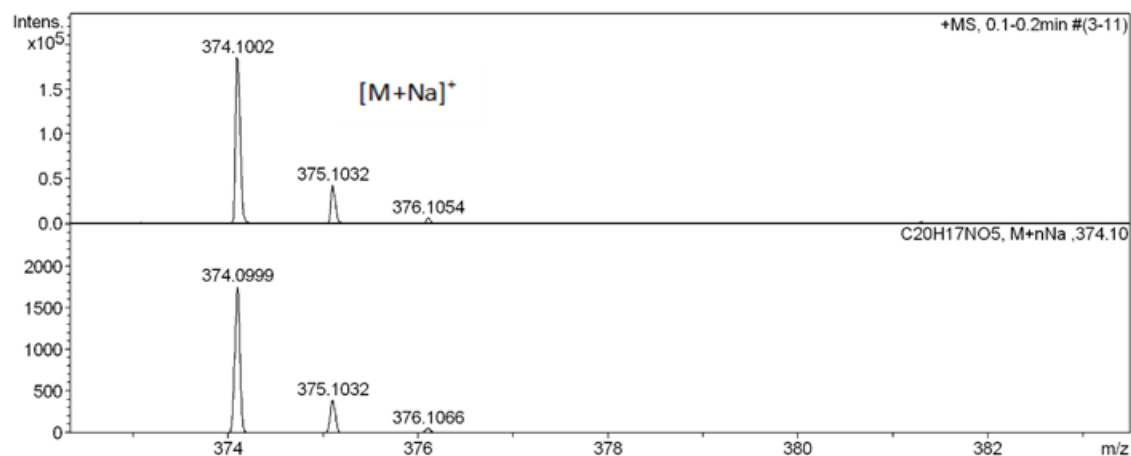

Figure. S36. ESI-HRMS spectra of indolinone **6m**

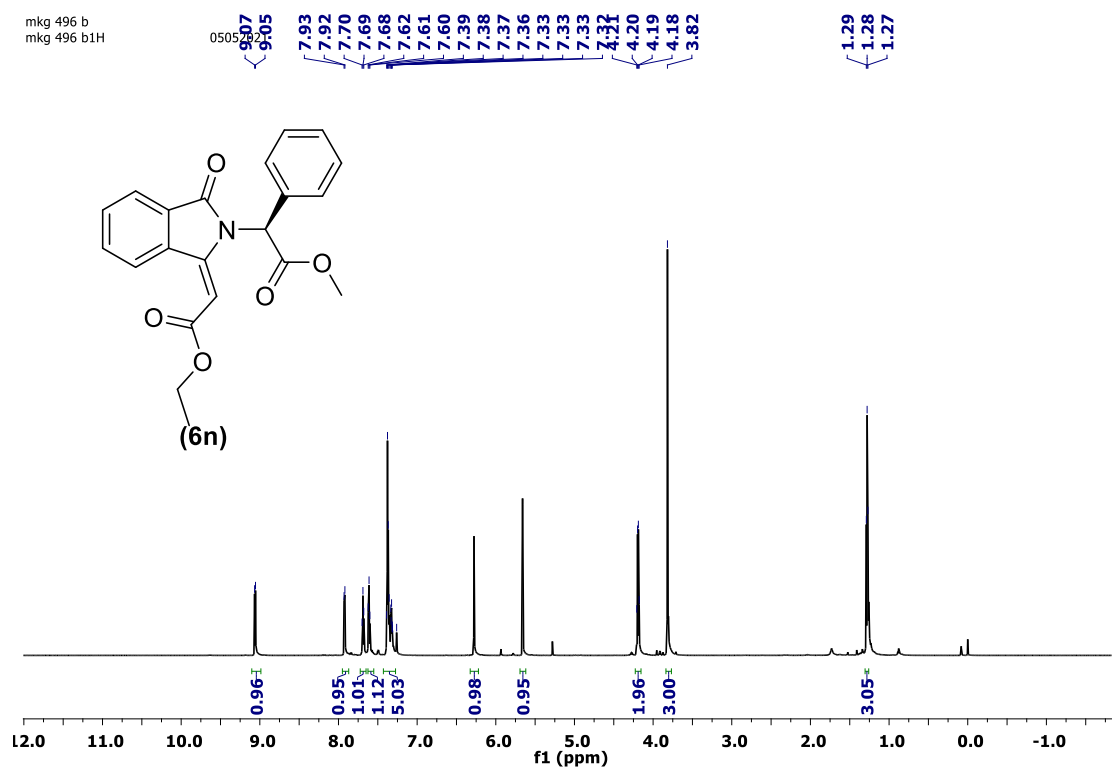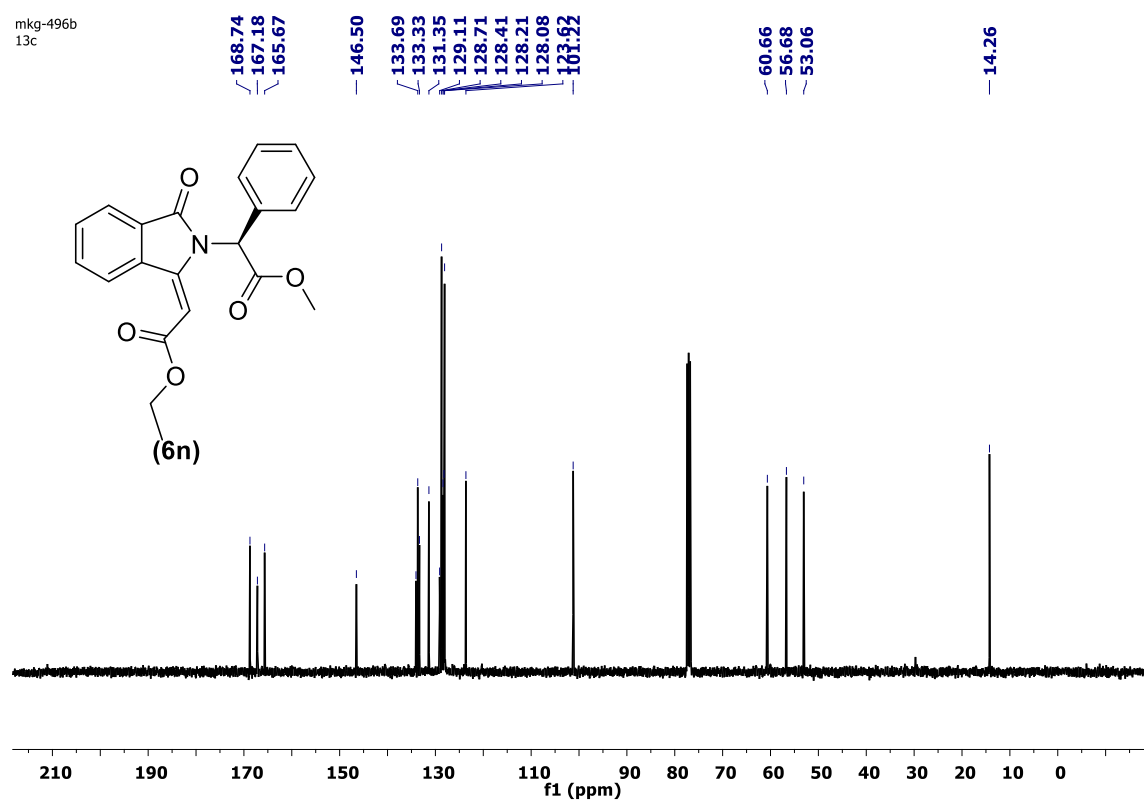

Figure. S37. <sup>1</sup>H, <sup>13</sup>C NMR spectra of indolinone 6n

# Display Report

## Analysis Info

Analysis Name D:\Data\JUN-2021\NKS\21062021\_NKS\_MKG\_496B.d  
Method Pos\_tune\_low.m  
Sample Name Tmix-131118  
Comment

Acquisition Date 6/21/2021 5:34:56 PM

Operator Amit S.Sahu  
Instrument micrOTOF-Q II 10337

## Acquisition Parameter

|             |            |                       |           |                  |           |
|-------------|------------|-----------------------|-----------|------------------|-----------|
| Source Type | ESI        | Ion Polarity          | Positive  | Set Nebulizer    | 0.4 Bar   |
| Focus       | Not active | Set Capillary         | 4500 V    | Set Dry Heater   | 180 °C    |
| Scan Begin  | 50 m/z     | Set End Plate Offset  | -500 V    | Set Dry Gas      | 4.0 l/min |
| Scan End    | 3000 m/z   | Set Collision Cell RF | 130.0 Vpp | Set Divert Valve | Waste     |

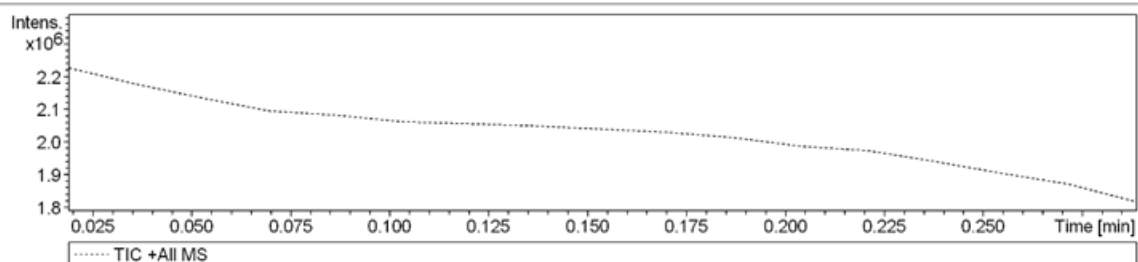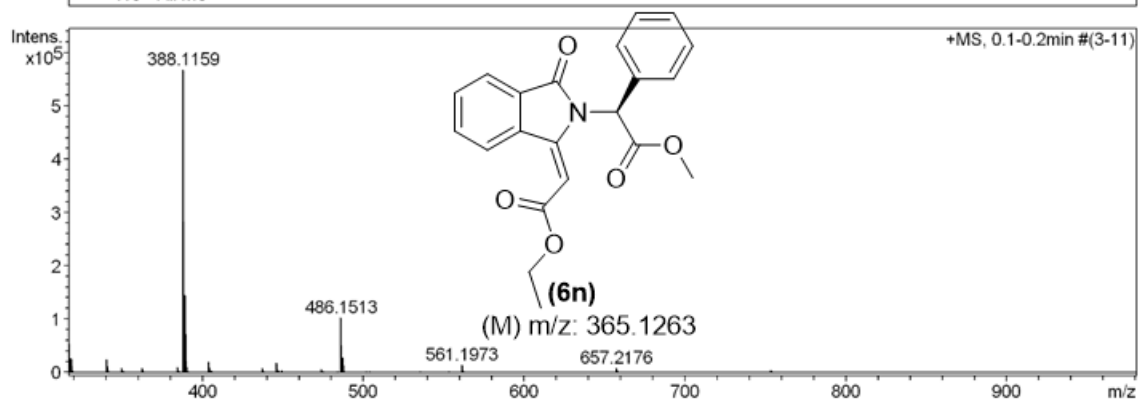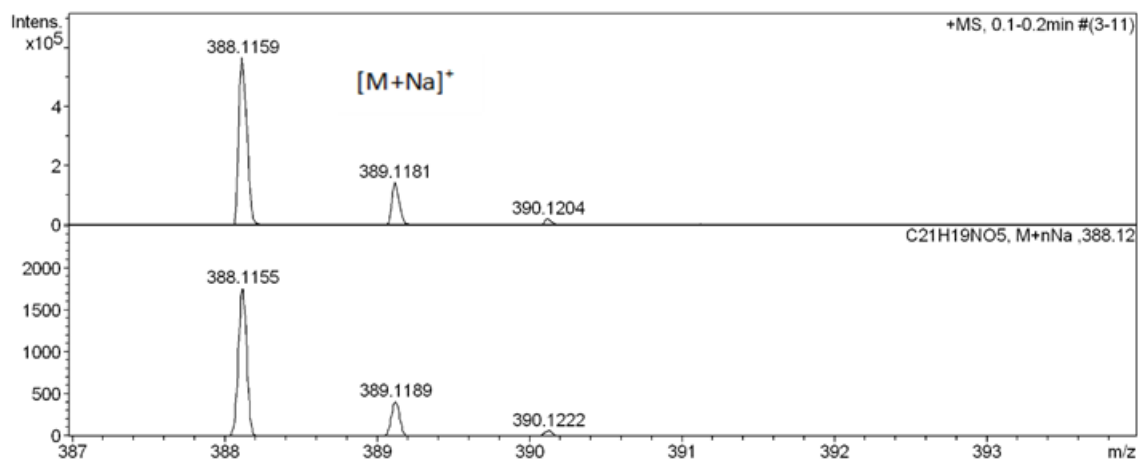

Figure. S38. ESI-HRMS spectra of indolinone 6n

mkg-501  
1H

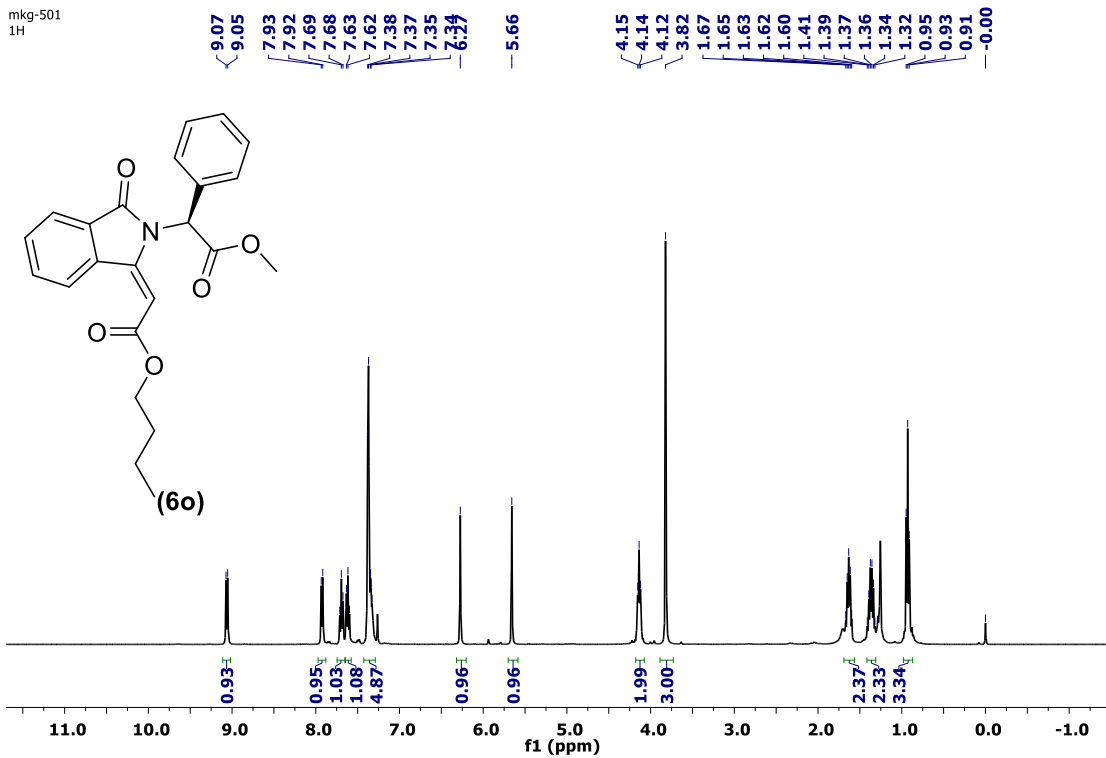

mkg-501  
13C

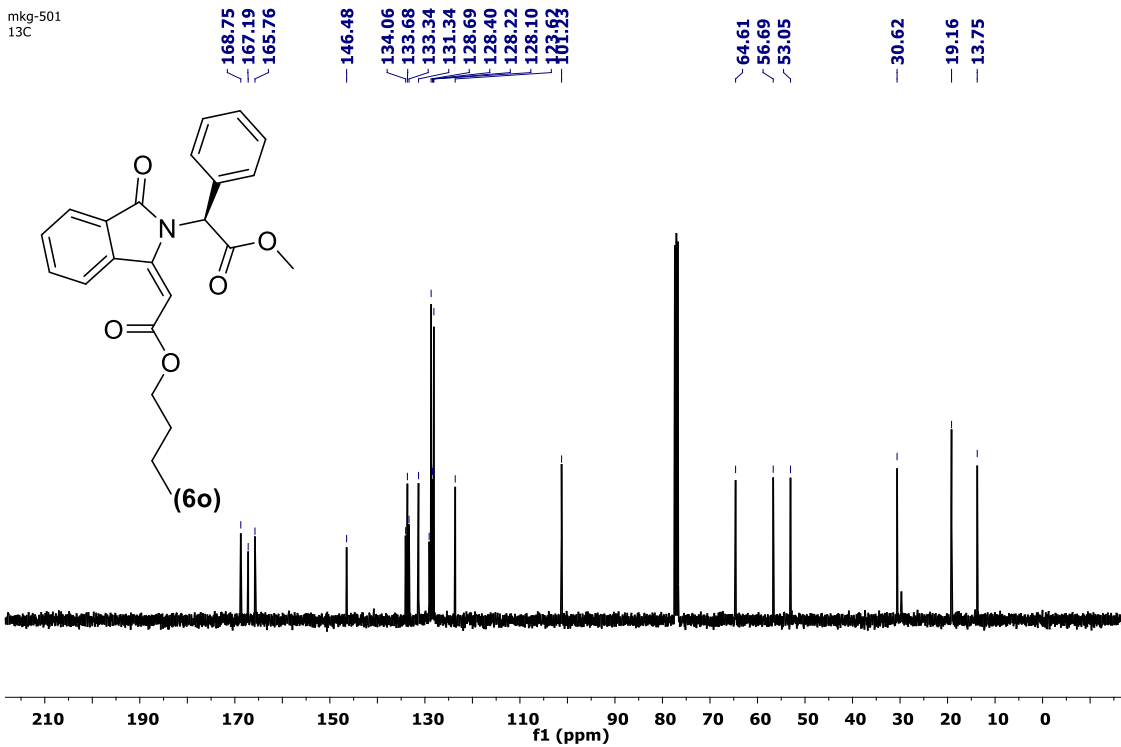

Figure. S39. <sup>1</sup>H, <sup>13</sup>C NMR spectra of indolinone 6o



## Display Report

### Analysis Info

Analysis Name D:\Data\JUN-2021\NKS\21062021\_NKS\_MKG\_501.d  
Method Pos\_tune\_low.m  
Sample Name Tmix-131118  
Comment

Acquisition Date 6/21/2021 5:36:56 PM

Operator Amit S.Sahu  
Instrument micrOTOF-Q II 10337

### Acquisition Parameter

|             |            |                       |           |                  |           |
|-------------|------------|-----------------------|-----------|------------------|-----------|
| Source Type | ESI        | Ion Polarity          | Positive  | Set Nebulizer    | 0.4 Bar   |
| Focus       | Not active | Set Capillary         | 4500 V    | Set Dry Heater   | 180 °C    |
| Scan Begin  | 50 m/z     | Set End Plate Offset  | -500 V    | Set Dry Gas      | 4.0 l/min |
| Scan End    | 3000 m/z   | Set Collision Cell RF | 130.0 Vpp | Set Divert Valve | Waste     |

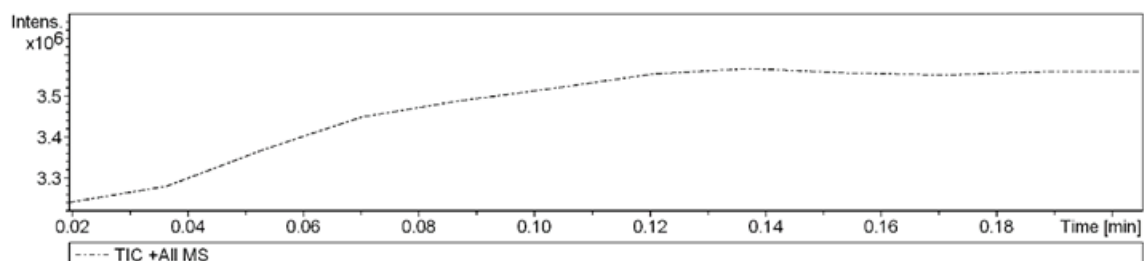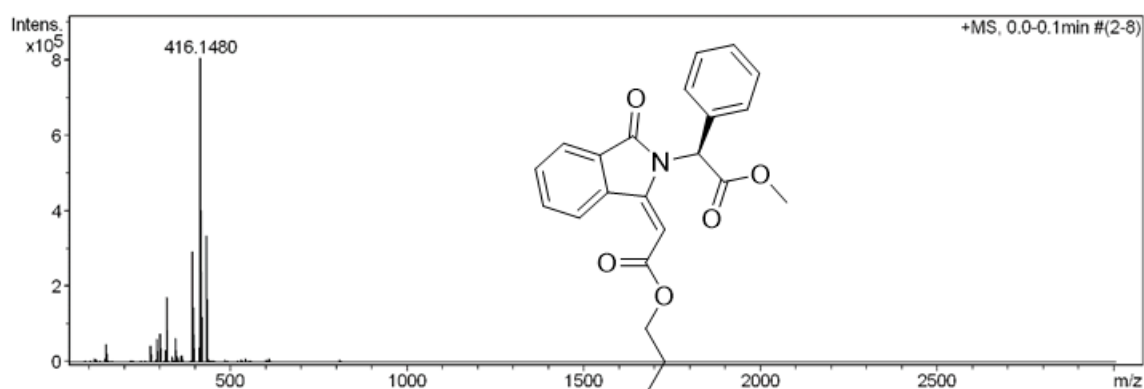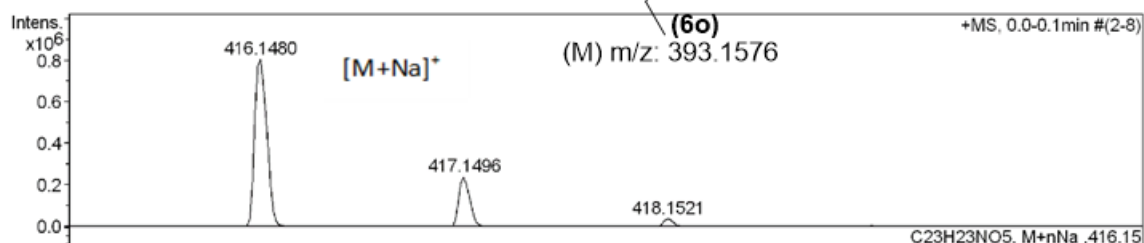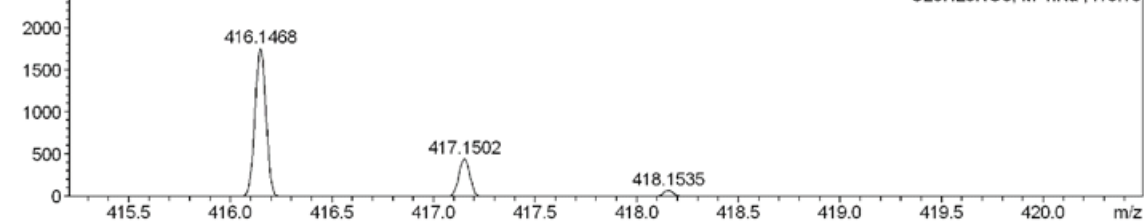

Figure. S40. ESI-HRMS spectra of indolinone **6o**

MKG-509  
1H

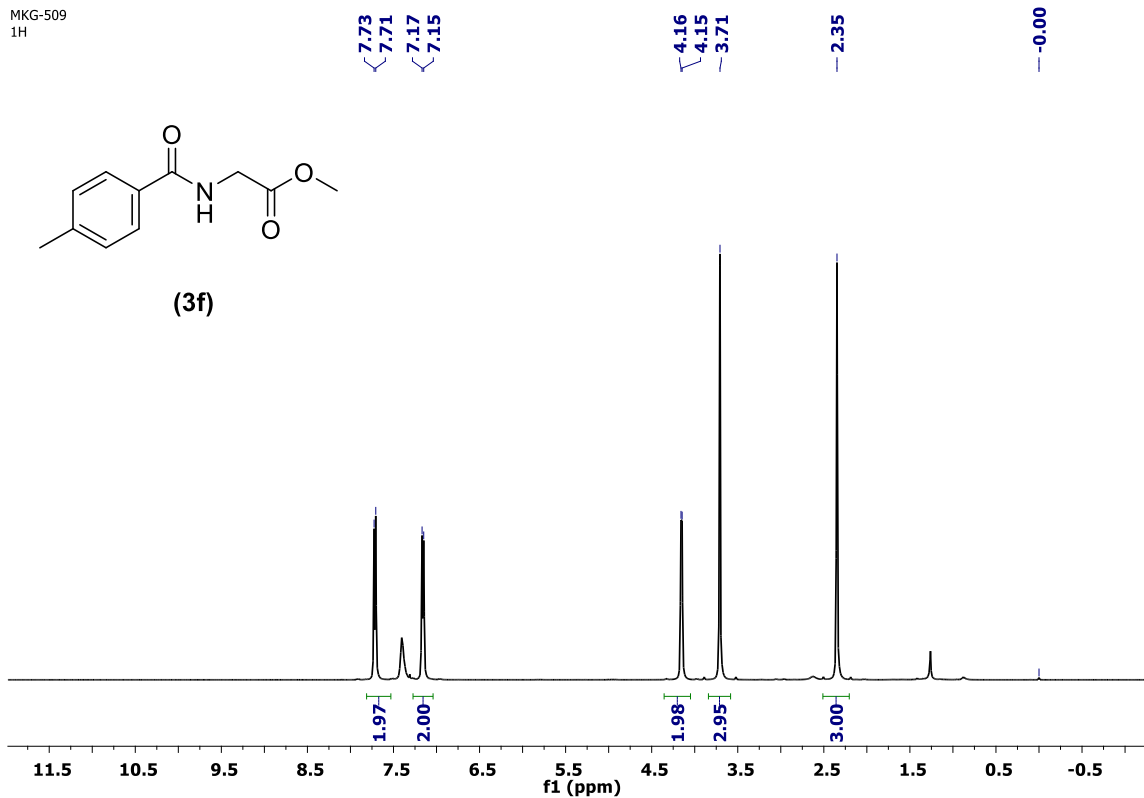

MKG-509  
13C

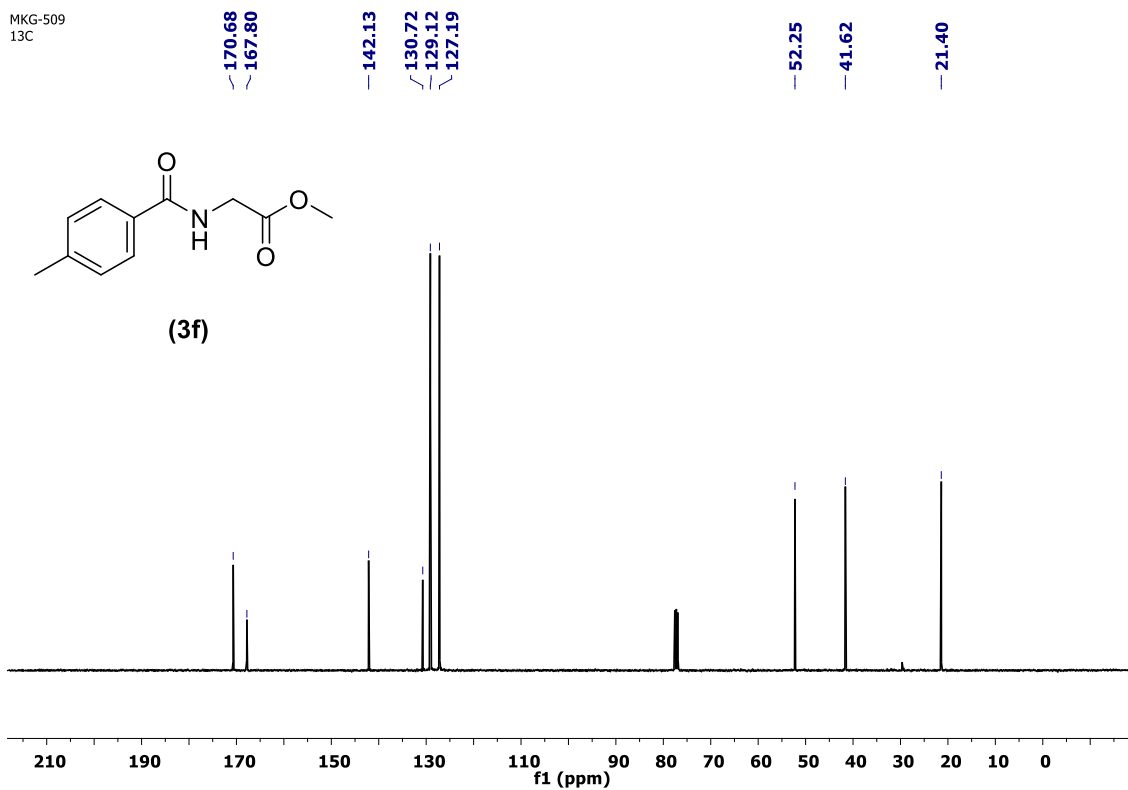

Figure. S41. <sup>1</sup>H, <sup>13</sup>C NMR spectra of benzamide **3f**

# Display Report

## Analysis Info

Analysis Name D:\Data\JUN-2021\NKS\21062021\_NKS\_MKG\_509.d  
Method Pos\_tune\_low.m  
Sample Name Tmix-131118  
Comment

Acquisition Date 6/21/2021 5:39:46 PM

Operator Amit S.Sahu  
Instrument micrOTOF-Q II 10337

## Acquisition Parameter

|             |            |                       |           |                  |           |
|-------------|------------|-----------------------|-----------|------------------|-----------|
| Source Type | ESI        | Ion Polarity          | Positive  | Set Nebulizer    | 0.4 Bar   |
| Focus       | Not active | Set Capillary         | 4500 V    | Set Dry Heater   | 180 °C    |
| Scan Begin  | 50 m/z     | Set End Plate Offset  | -500 V    | Set Dry Gas      | 4.0 l/min |
| Scan End    | 3000 m/z   | Set Collision Cell RF | 130.0 Vpp | Set Divert Valve | Waste     |

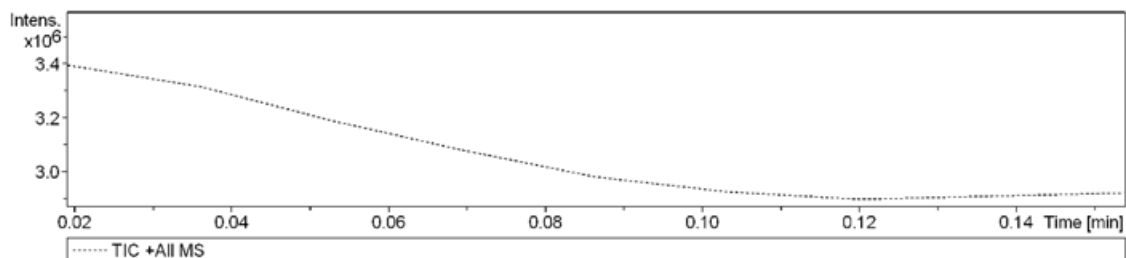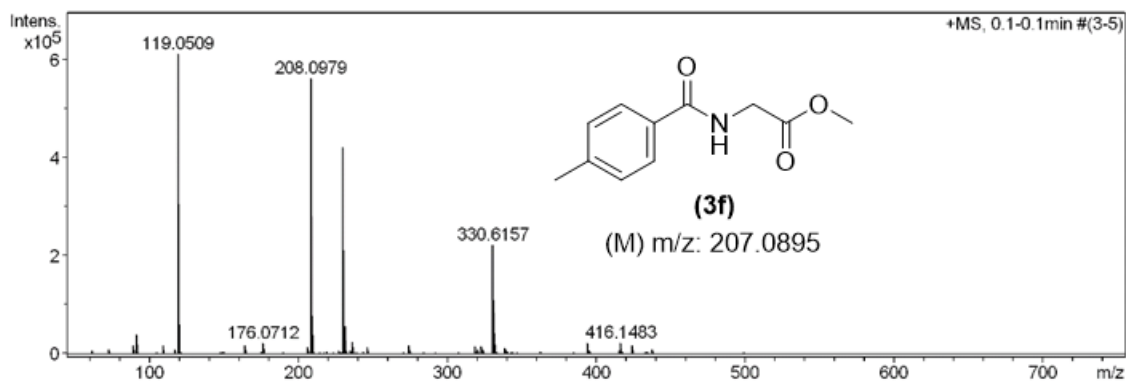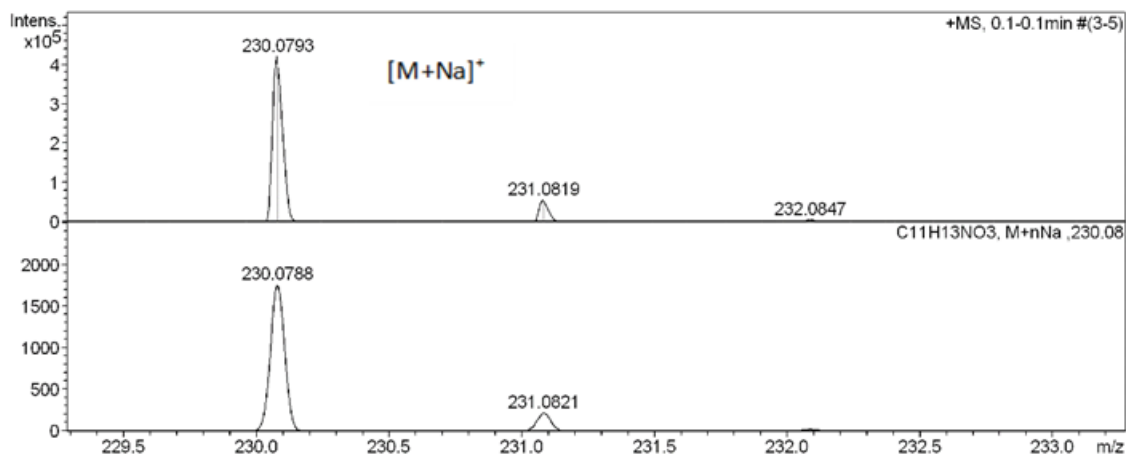

**Figure. S42.** ESI-HRMS spectra of benzamide **3f**

mkg-139 re  
1H

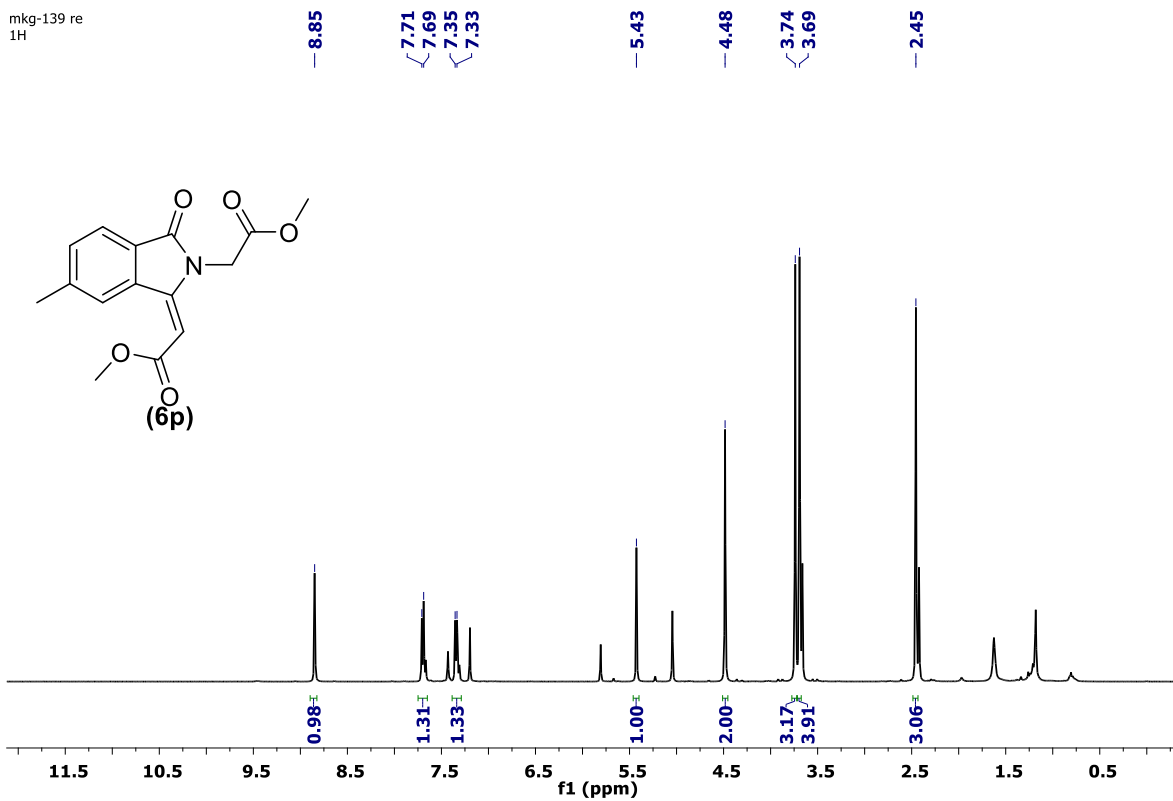

mkg-139 re  
13C

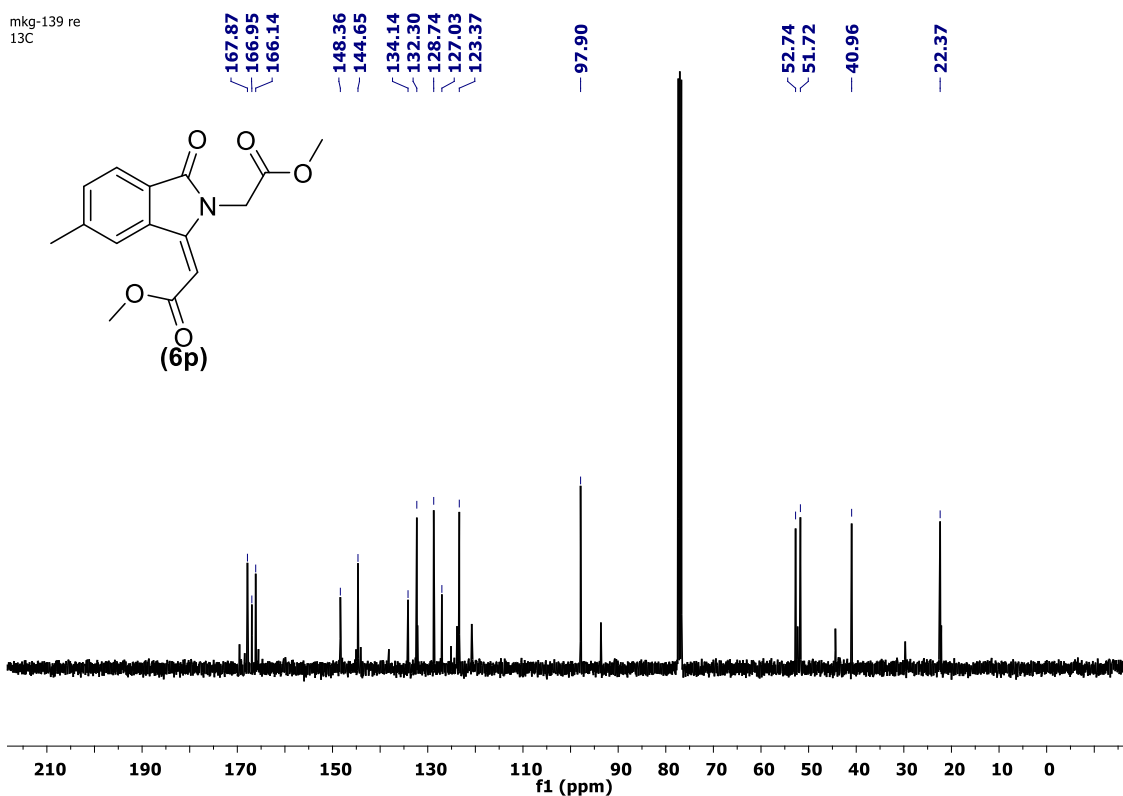

Figure.S43. <sup>1</sup>H, <sup>13</sup>C NMR spectra of indolinone **6p**

# Display Report

## Analysis Info

Analysis Name D:\Data\JUN-2021\NKS\21062021\_NKS\_MKG\_514.d  
Method Pos\_tune\_low.m  
Sample Name Tmix-131118  
Comment

Acquisition Date 6/21/2021 5:43:46 PM

Operator Amit S.Sahu  
Instrument micrOTOF-Q II 10337

## Acquisition Parameter

|             |            |                       |           |                  |           |
|-------------|------------|-----------------------|-----------|------------------|-----------|
| Source Type | ESI        | Ion Polarity          | Positive  | Set Nebulizer    | 0.4 Bar   |
| Focus       | Not active | Set Capillary         | 4500 V    | Set Dry Heater   | 180 °C    |
| Scan Begin  | 50 m/z     | Set End Plate Offset  | -500 V    | Set Dry Gas      | 4.0 l/min |
| Scan End    | 3000 m/z   | Set Collision Cell RF | 130.0 Vpp | Set Divert Valve | Waste     |

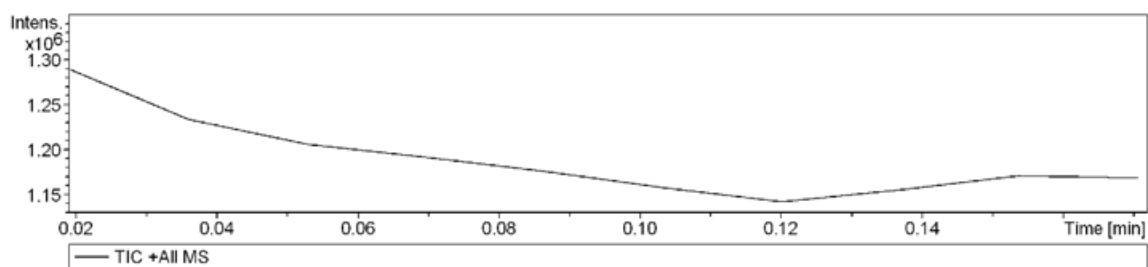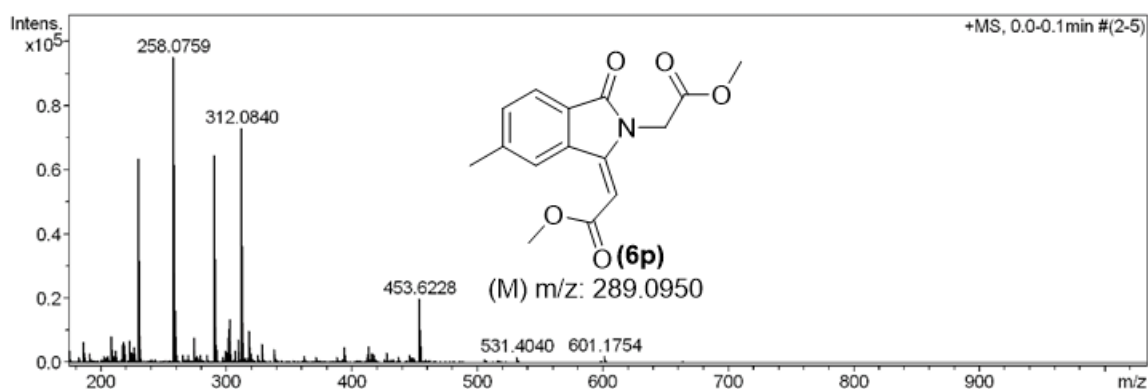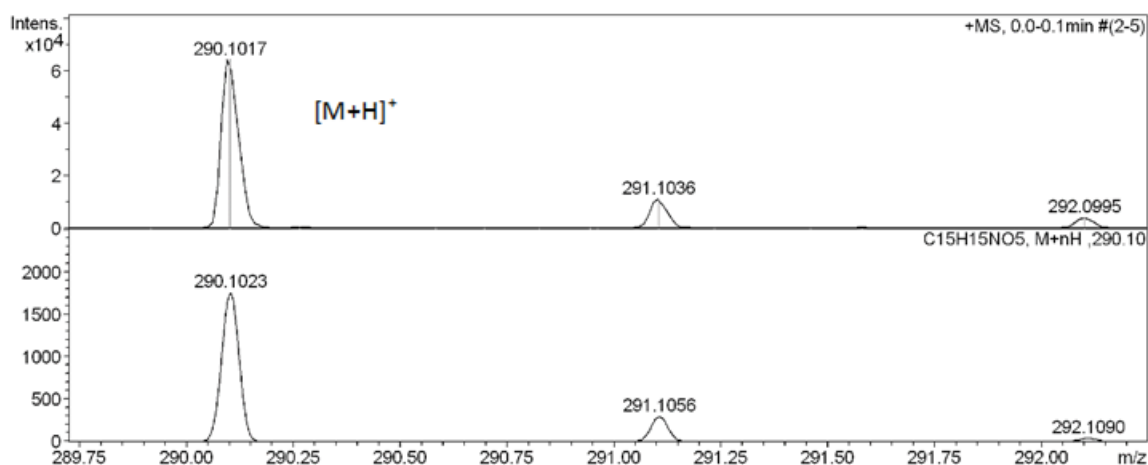

Figure. S44. ESI-HRMS spectra of indolinone 6p

mkg-515  
1H

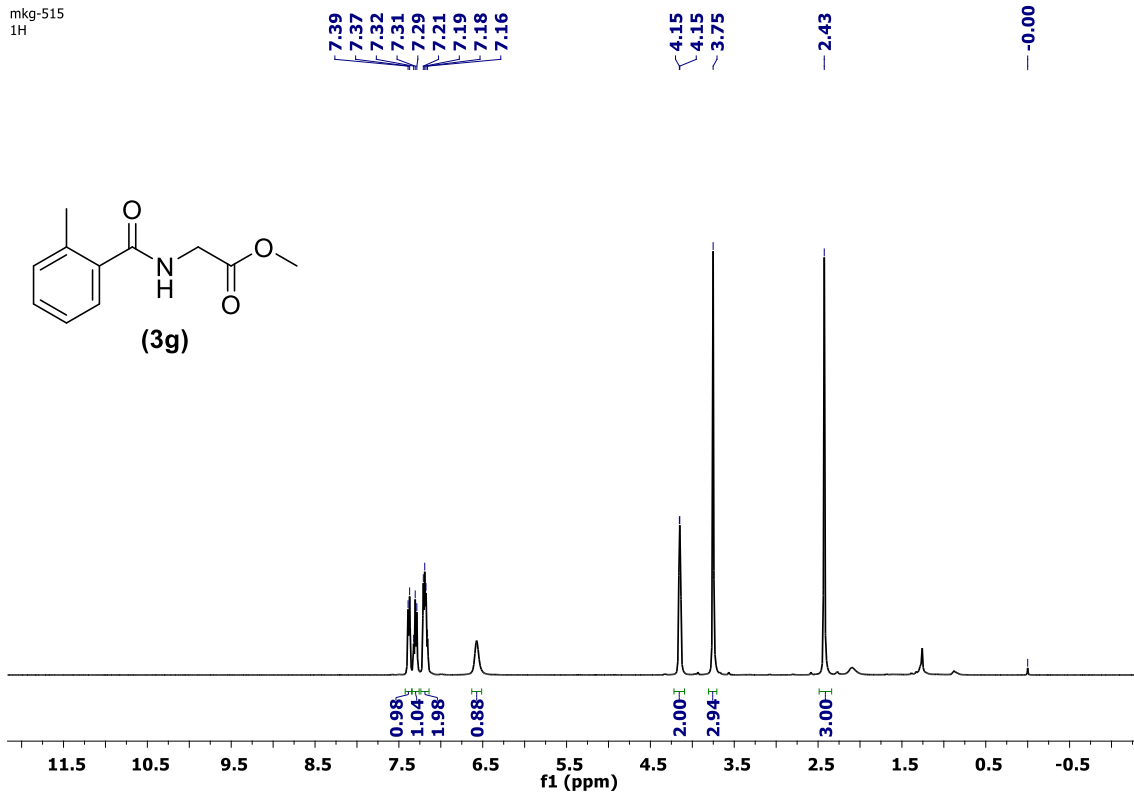

mkg-515  
13c

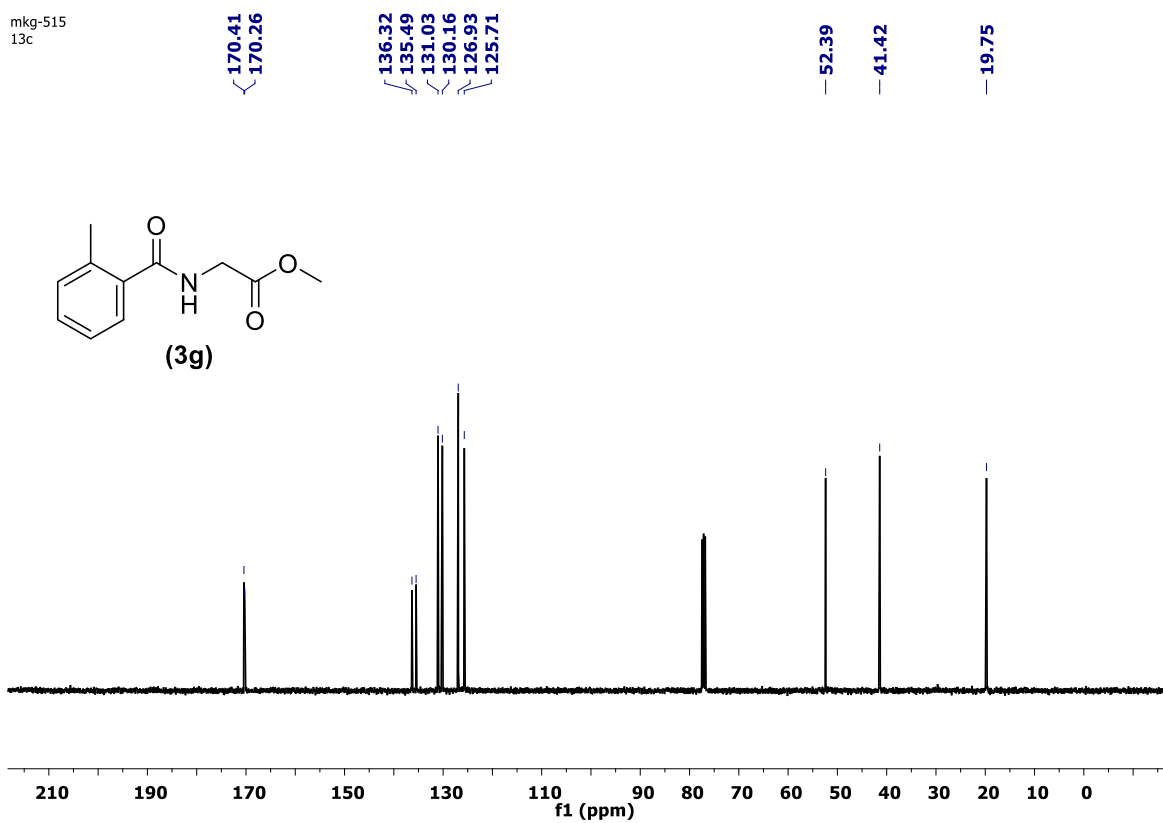

Figure. S45. <sup>1</sup>H, <sup>13</sup>C NMR spectra of benzamide 3g

# Display Report

## Analysis Info

Analysis Name D:\Data\JUN-2021\NKS\21062021\_NKS\_MKG\_515.d  
Method Pos\_tune\_low.m  
Sample Name Tmix-131118  
Comment

Acquisition Date 6/21/2021 5:46:21 PM

Operator Amit S.Sahu  
Instrument micrOTOF-Q II 10337

## Acquisition Parameter

|             |            |                       |           |                  |           |
|-------------|------------|-----------------------|-----------|------------------|-----------|
| Source Type | ESI        | Ion Polarity          | Positive  | Set Nebulizer    | 0.4 Bar   |
| Focus       | Not active | Set Capillary         | 4500 V    | Set Dry Heater   | 180 °C    |
| Scan Begin  | 50 m/z     | Set End Plate Offset  | -500 V    | Set Dry Gas      | 4.0 l/min |
| Scan End    | 3000 m/z   | Set Collision Cell RF | 130.0 Vpp | Set Divert Valve | Waste     |

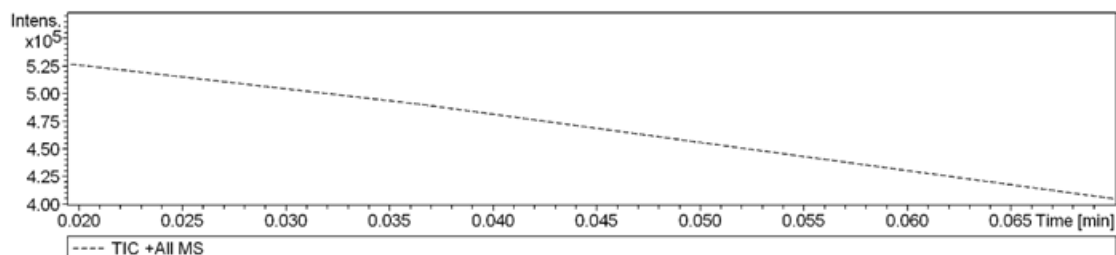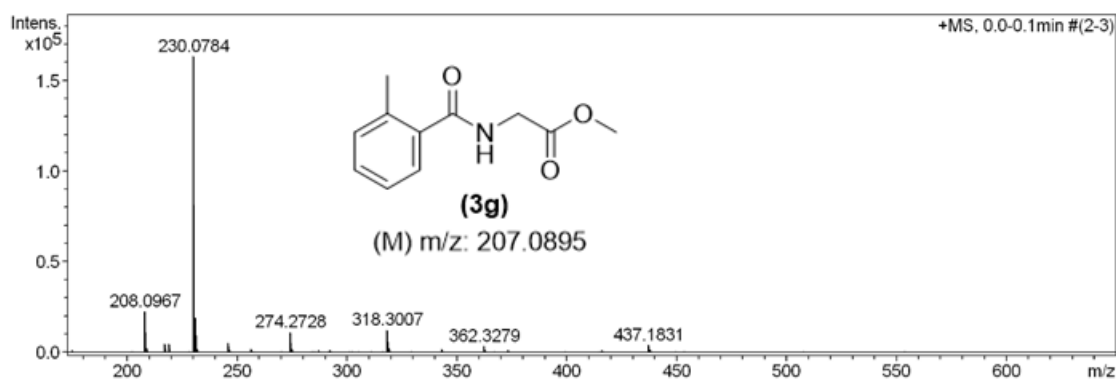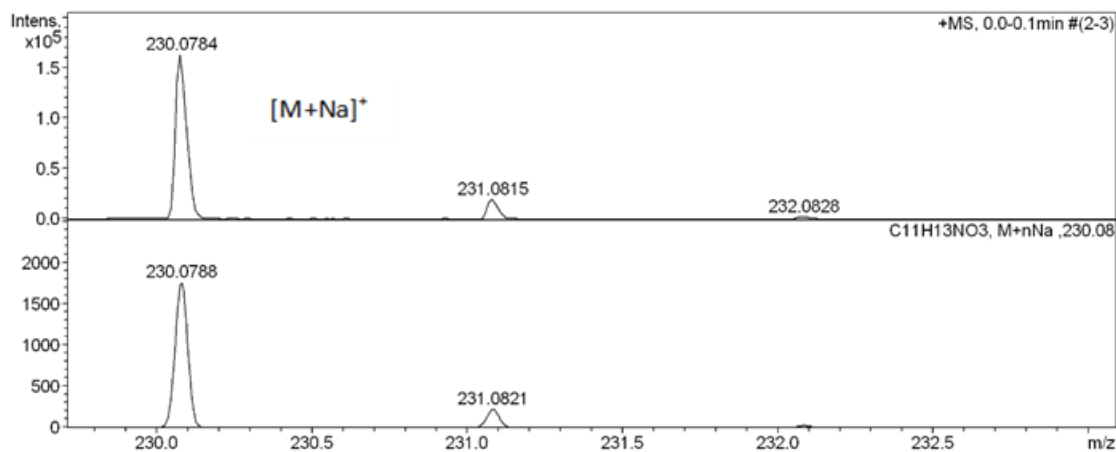

Figure. S46. ESI-HRMS spectra of benzamide **3g**

mkg-517  
1H

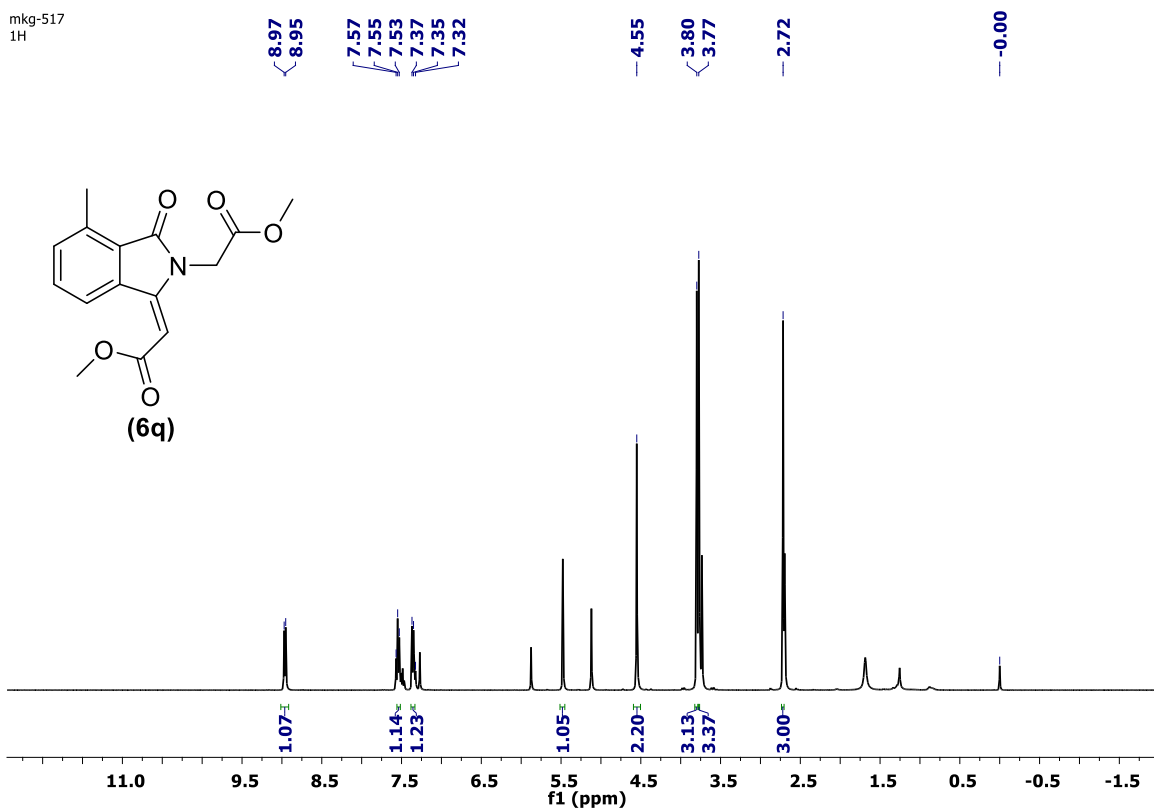

mkg-517  
13C

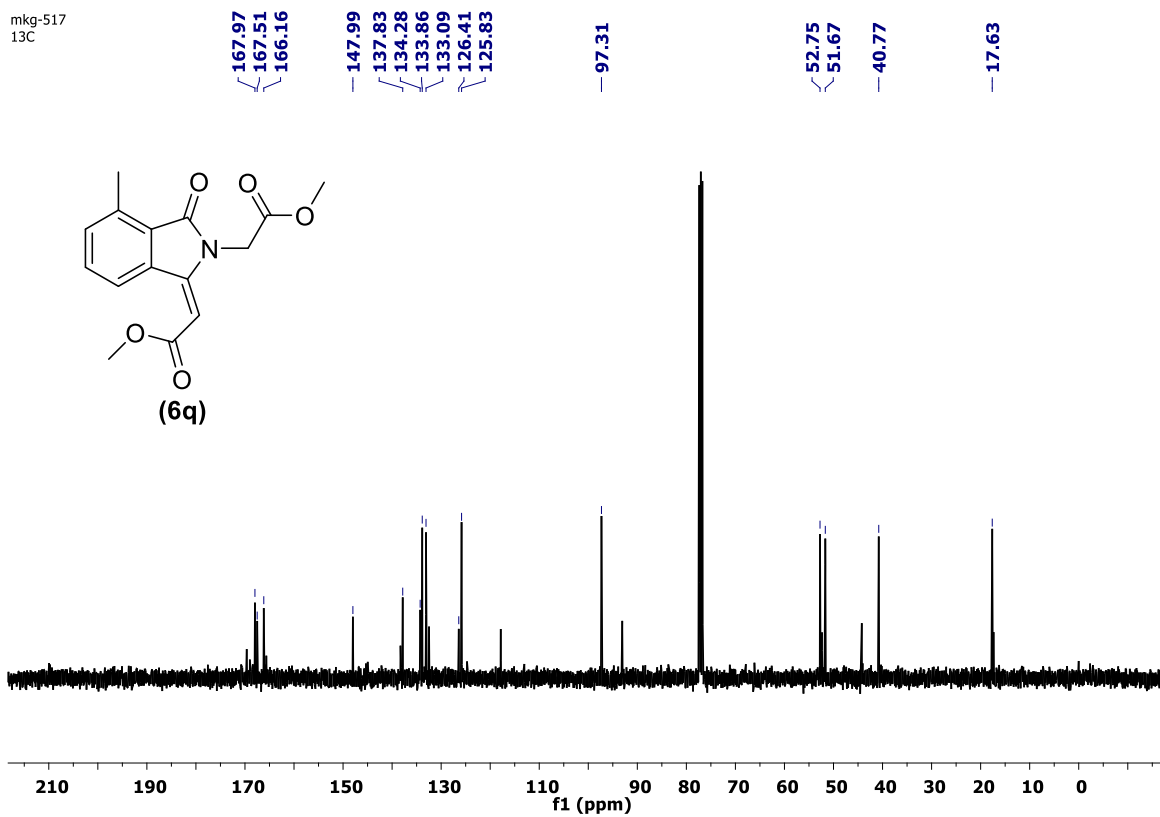

Figure. S47. <sup>1</sup>H, <sup>13</sup>C NMR spectra of indolinone **6q**



## Display Report

### Analysis Info

Analysis Name D:\Data\JUN-2021\NKS\21062021\_NKS\_MKG\_517.d  
Method Pos\_tune\_low.m  
Sample Name Tmix-131118  
Comment

Acquisition Date 6/21/2021 5:48:18 PM

Operator Amit S.Sahu  
Instrument micrOTOF-Q II 10337

### Acquisition Parameter

|             |            |                       |           |                  |           |
|-------------|------------|-----------------------|-----------|------------------|-----------|
| Source Type | ESI        | Ion Polarity          | Positive  | Set Nebulizer    | 0.4 Bar   |
| Focus       | Not active | Set Capillary         | 4500 V    | Set Dry Heater   | 180 °C    |
| Scan Begin  | 50 m/z     | Set End Plate Offset  | -500 V    | Set Dry Gas      | 4.0 l/min |
| Scan End    | 3000 m/z   | Set Collision Cell RF | 130.0 Vpp | Set Divert Valve | Waste     |

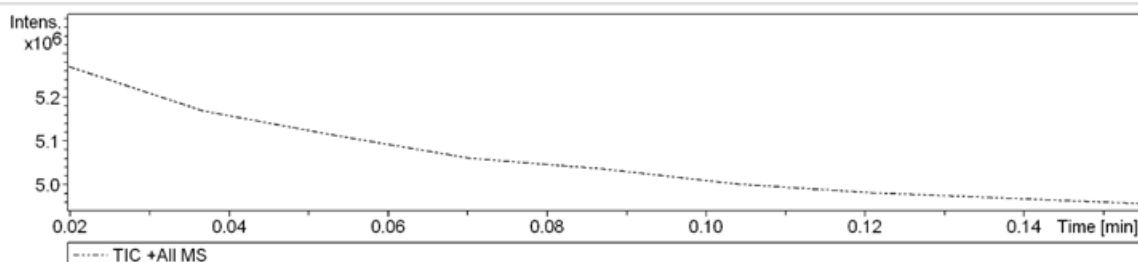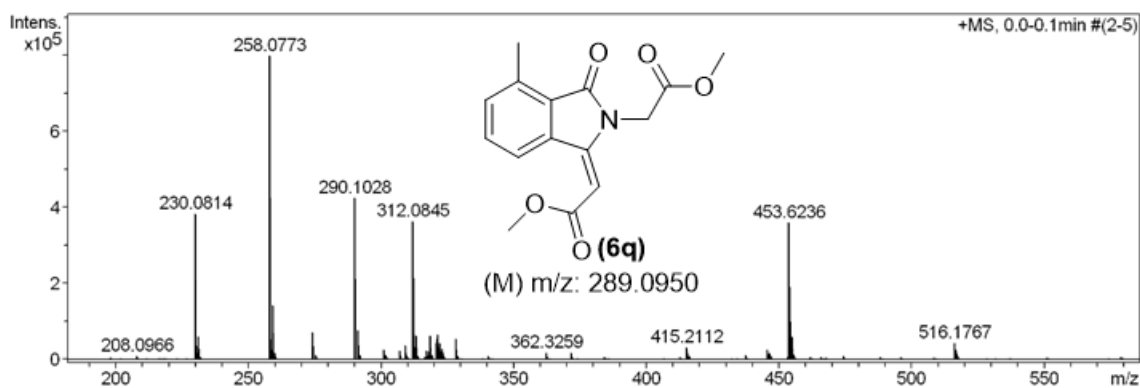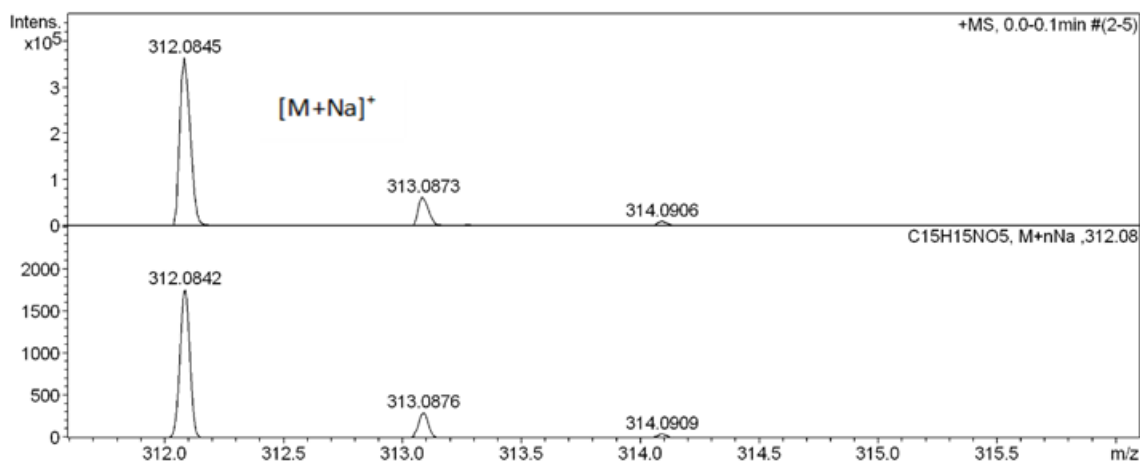

Figure. S48. ESI-HRMS spectra of indolinone 6q

MKG-508  
1H

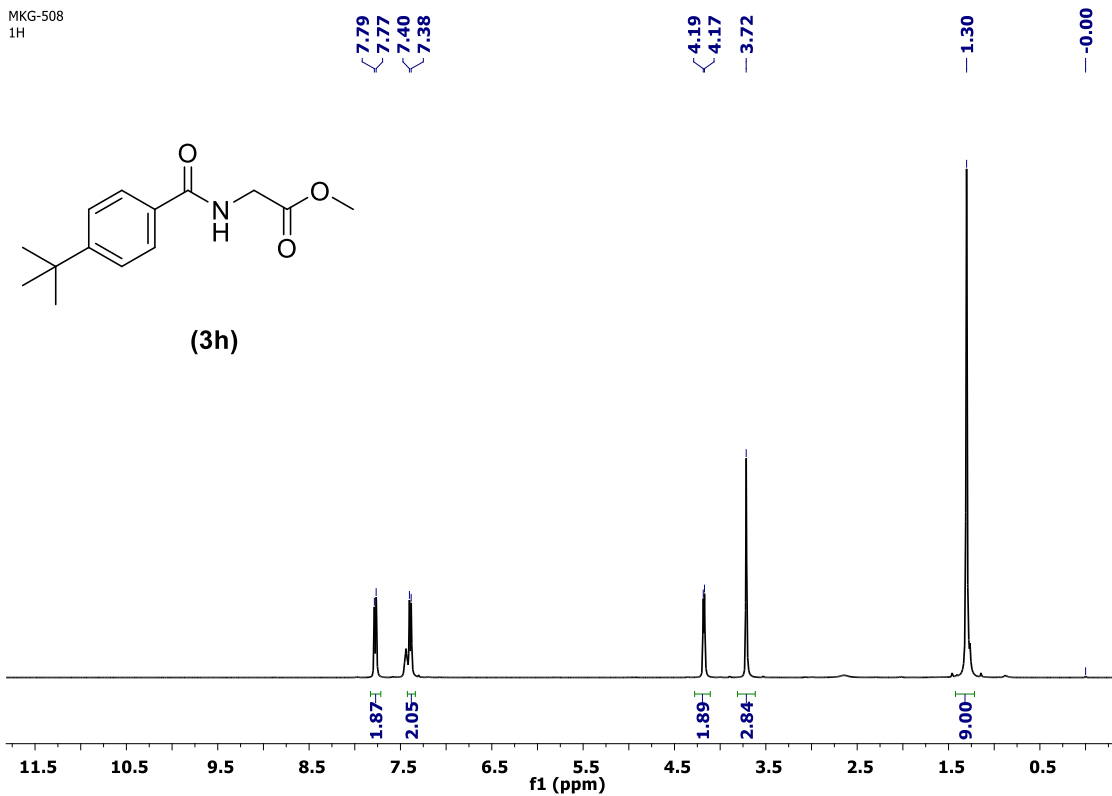

MKG-508  
13C

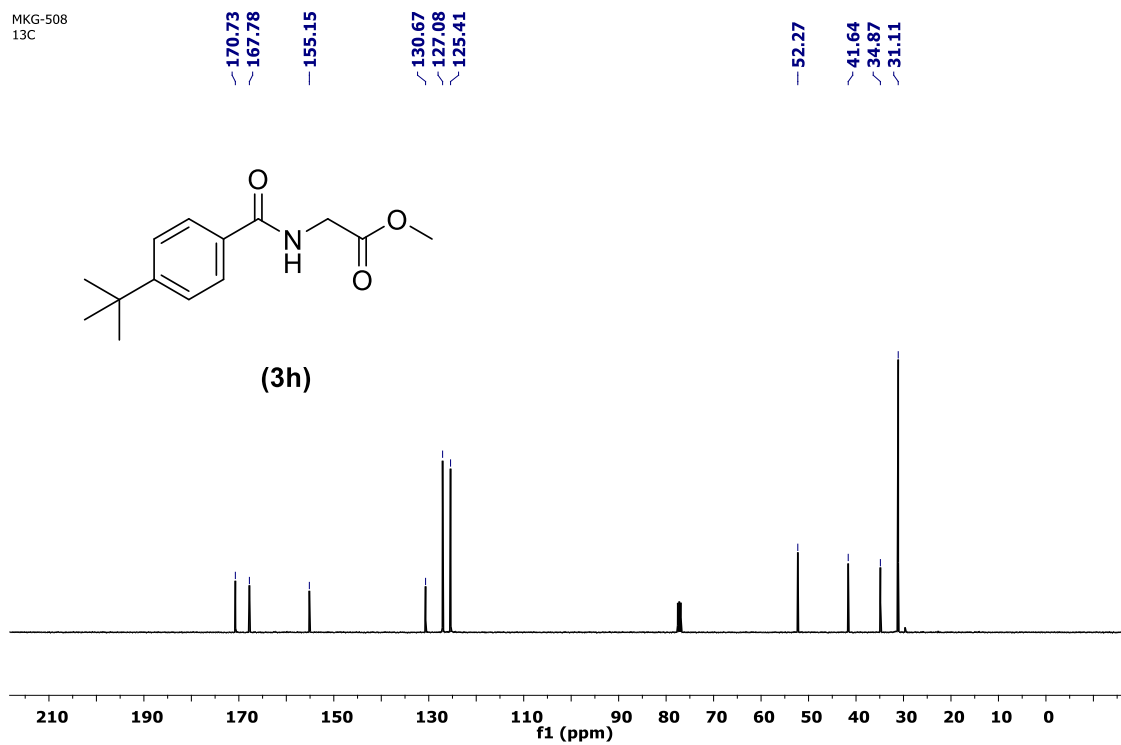

**Figure. S49.** <sup>1</sup>H, <sup>13</sup>C NMR spectra of benzamide **3h**

# Display Report

## Analysis Info

Analysis Name D:\Data\JULY-2021\NKS\MKG\13072021\_NKS-MKG-508-RE.d  
Method Pos\_tune\_low.m  
Sample Name Tmix-131118  
Comment

Acquisition Date 7/13/2021 5:51:31 PM  
Operator PRAKASH BEHERA  
Instrument micrOTOF-Q II 10337

## Acquisition Parameter

|             |            |                       |           |                  |           |
|-------------|------------|-----------------------|-----------|------------------|-----------|
| Source Type | ESI        | Ion Polarity          | Positive  | Set Nebulizer    | 0.4 Bar   |
| Focus       | Not active | Set Capillary         | 4500 V    | Set Dry Heater   | 180 °C    |
| Scan Begin  | 50 m/z     | Set End Plate Offset  | -500 V    | Set Dry Gas      | 4.0 l/min |
| Scan End    | 3000 m/z   | Set Collision Cell RF | 130.0 Vpp | Set Divert Valve | Waste     |

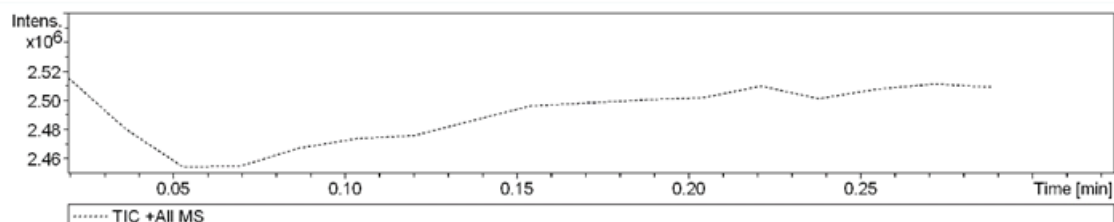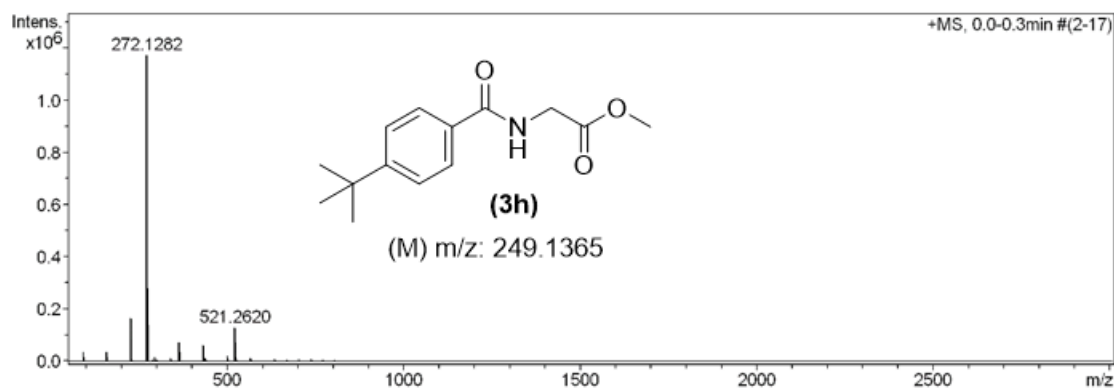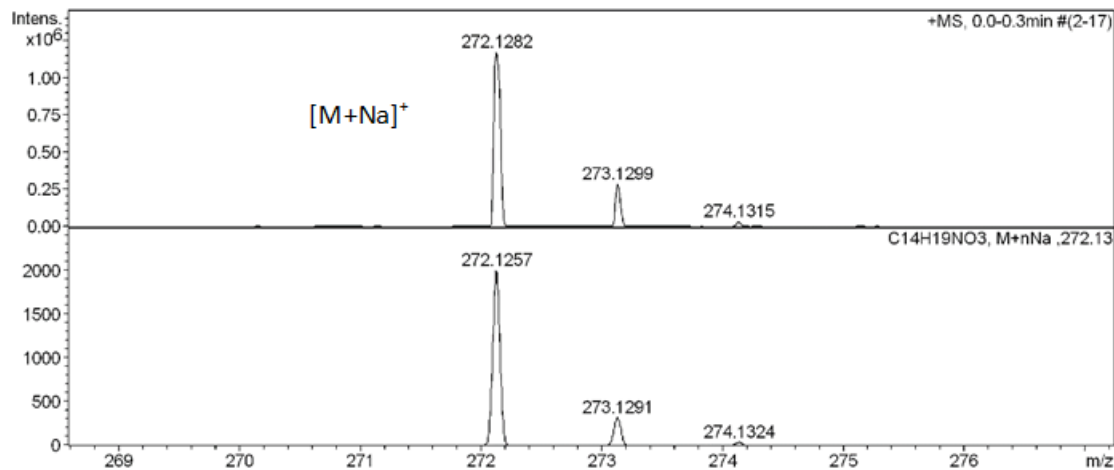

**Figure. S50.** ESI-HRMS spectra of benzamide **3h**

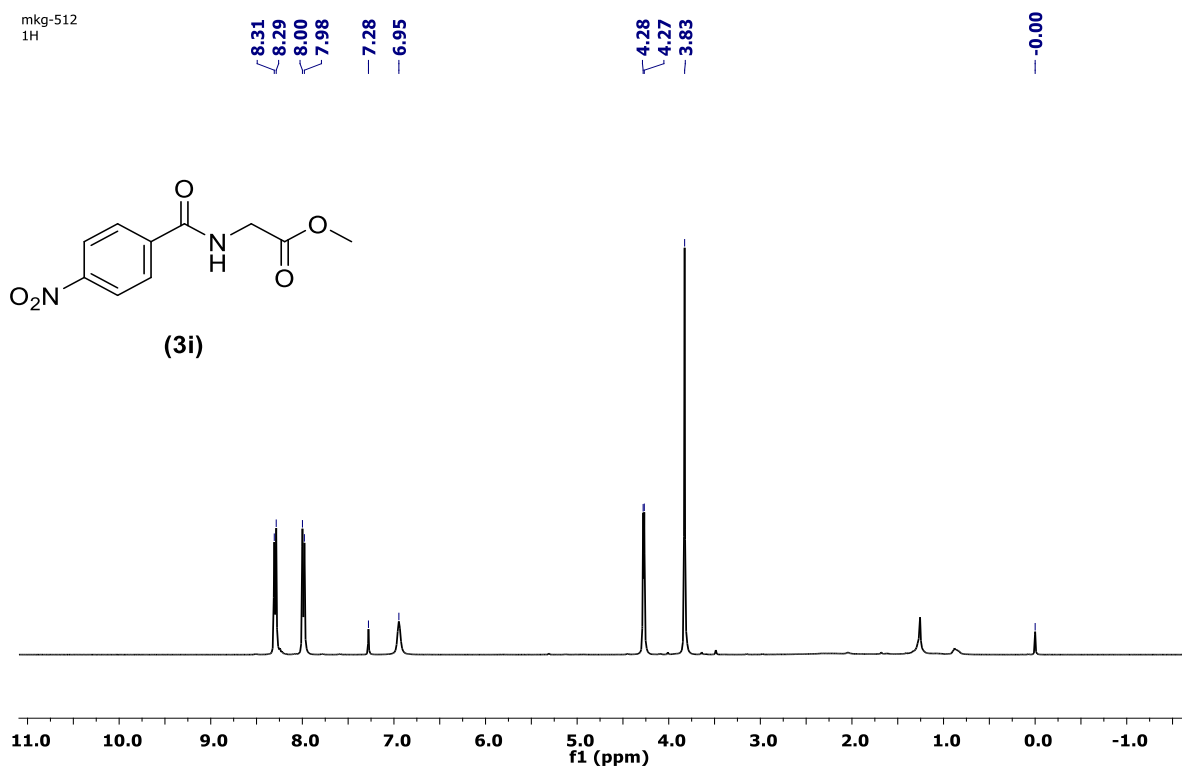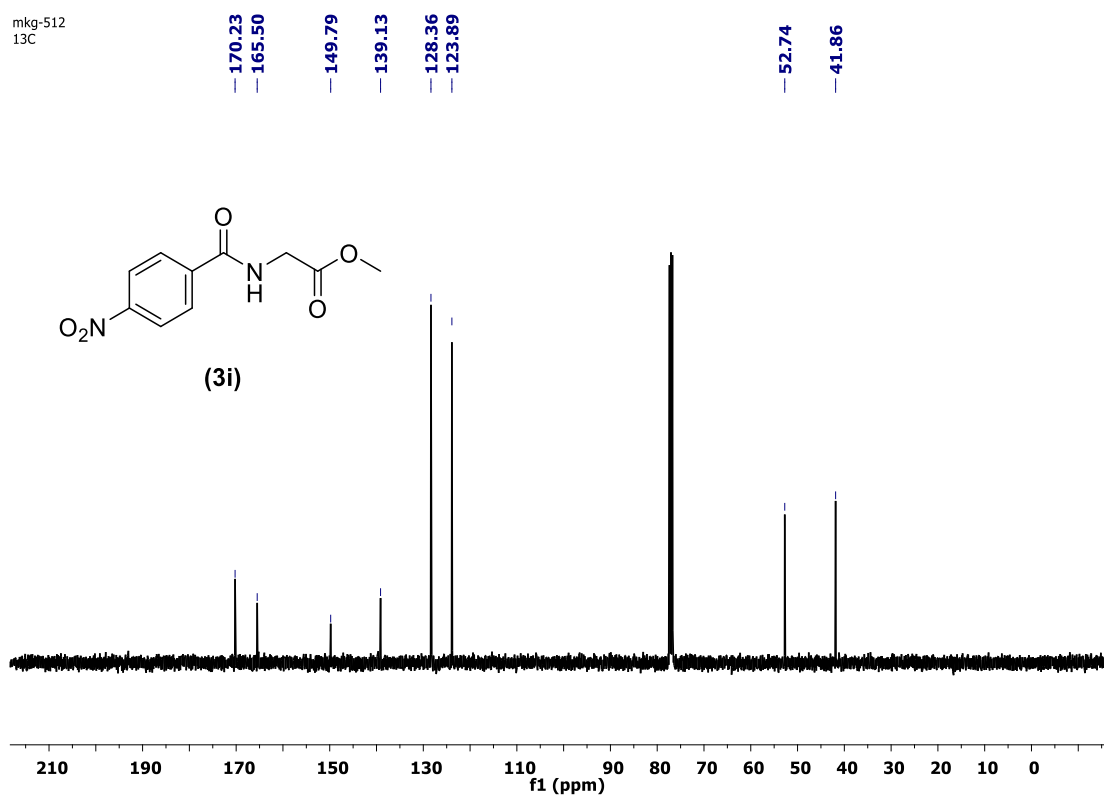

Figure. S51. <sup>1</sup>H, <sup>13</sup>C NMR spectra of benzamide 3i

# Display Report

## Analysis Info

Analysis Name D:\Data\JULY-2021\NKS\MKG\13072021\_NKS-MKG-512.d  
Method Pos\_tune\_low.m  
Sample Name Tmix-131118  
Comment

Acquisition Date 7/13/2021 5:56:32 PM

Operator PRAKASH BEHERA  
Instrument micOTOF-Q II 10337

## Acquisition Parameter

|             |            |                       |           |                  |           |
|-------------|------------|-----------------------|-----------|------------------|-----------|
| Source Type | ESI        | Ion Polarity          | Positive  | Set Nebulizer    | 0.4 Bar   |
| Focus       | Not active | Set Capillary         | 4500 V    | Set Dry Heater   | 180 °C    |
| Scan Begin  | 50 m/z     | Set End Plate Offset  | -500 V    | Set Dry Gas      | 4.0 l/min |
| Scan End    | 3000 m/z   | Set Collision Cell RF | 130.0 Vpp | Set Divert Valve | Waste     |

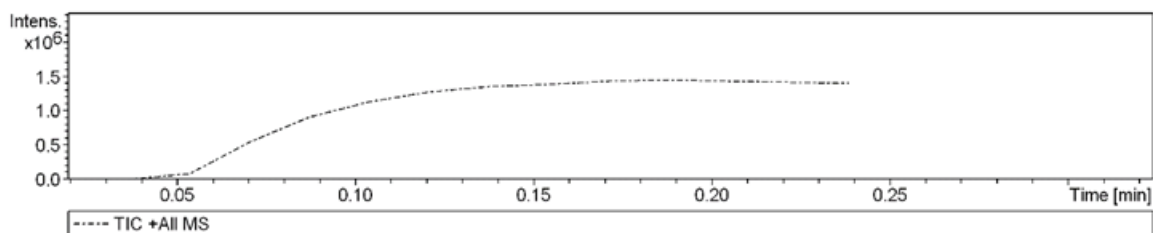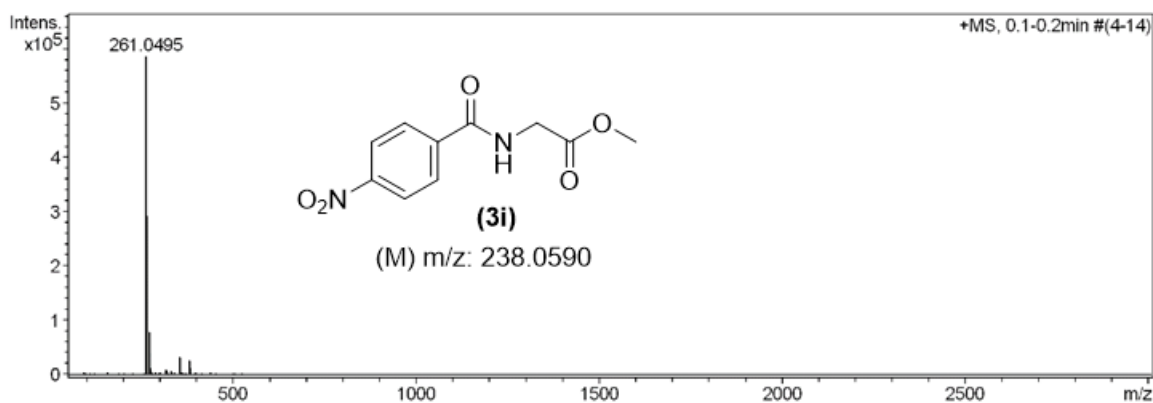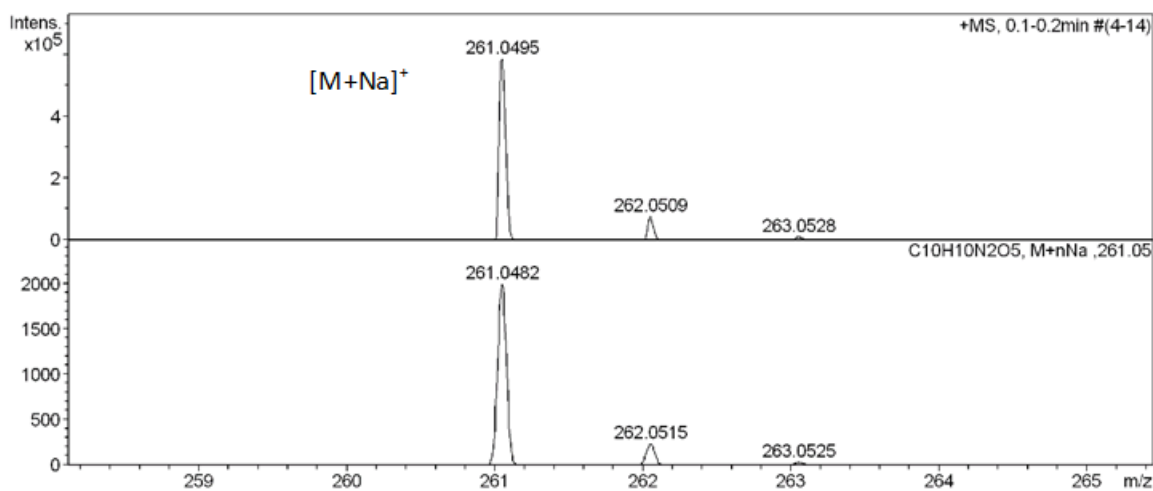

Figure. S52. ESI-HRMS spectra of benzamide **3i**

mkg-519  
1H

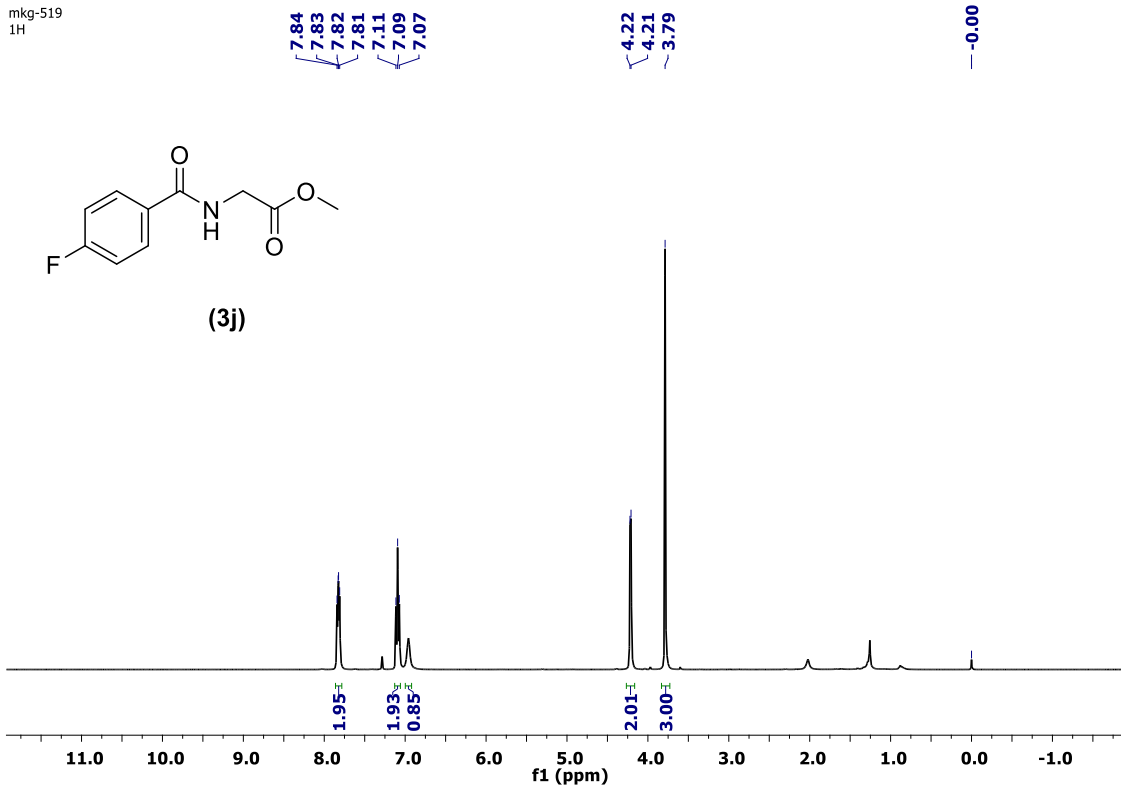

mkg-519  
13C

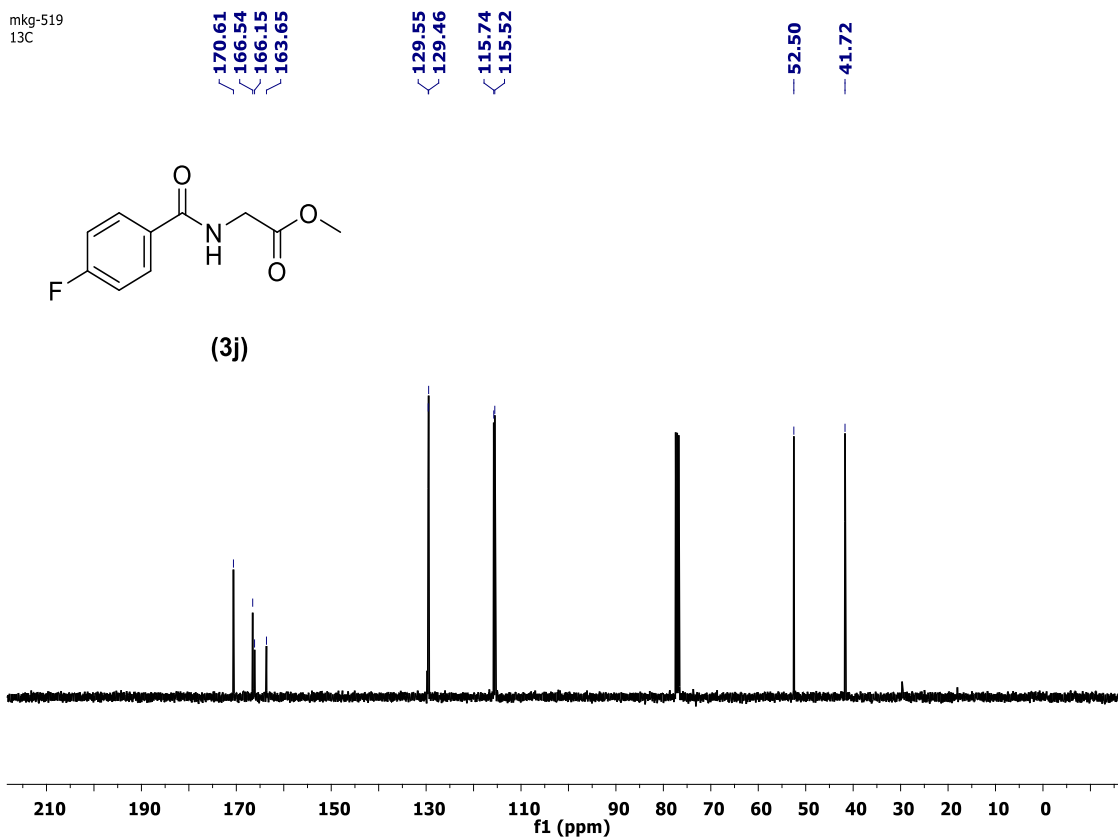

Figure. S53. <sup>1</sup>H, <sup>13</sup>C NMR spectra of benzamide 3j

# Display Report

## Analysis Info

Analysis Name D:\Data\JULY-2021\NKS\MKG\13072021\_NKS-MKG-519.d  
Method Pos\_tune\_low.m  
Sample Name Tmix-131118  
Comment

Acquisition Date 7/13/2021 5:59:41 PM

Operator PRAKASH BEHERA  
Instrument micrOTOF-Q II 10337

## Acquisition Parameter

|             |            |                       |           |                  |           |
|-------------|------------|-----------------------|-----------|------------------|-----------|
| Source Type | ESI        | Ion Polarity          | Positive  | Set Nebulizer    | 0.4 Bar   |
| Focus       | Not active | Set Capillary         | 4500 V    | Set Dry Heater   | 180 °C    |
| Scan Begin  | 50 m/z     | Set End Plate Offset  | -500 V    | Set Dry Gas      | 4.0 l/min |
| Scan End    | 3000 m/z   | Set Collision Cell RF | 130.0 Vpp | Set Divert Valve | Waste     |

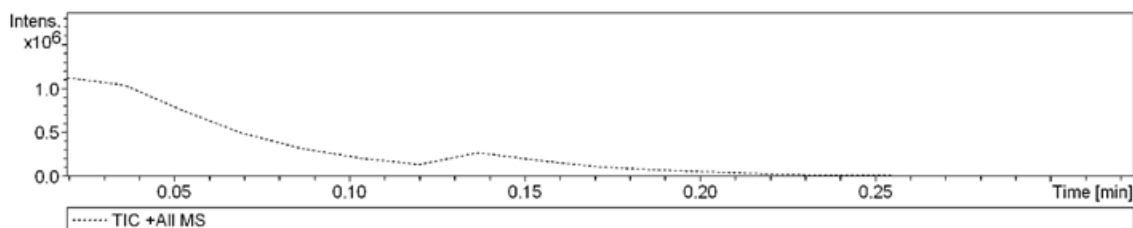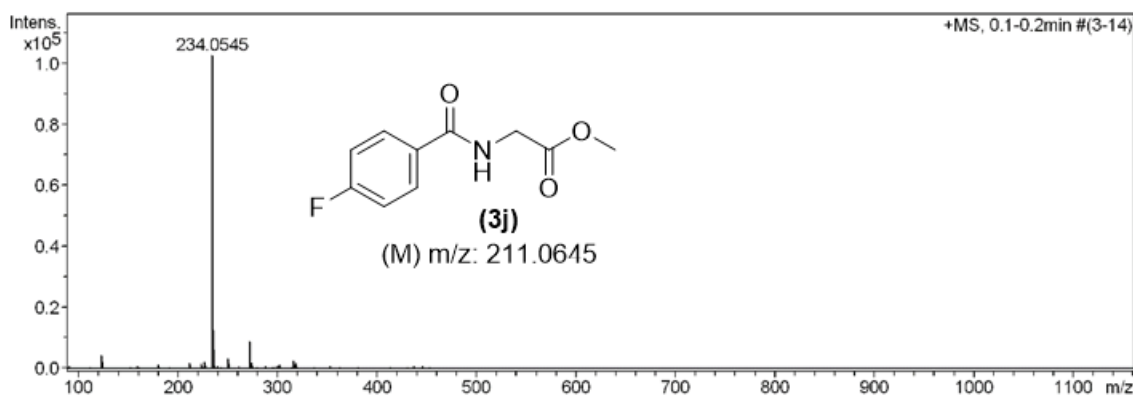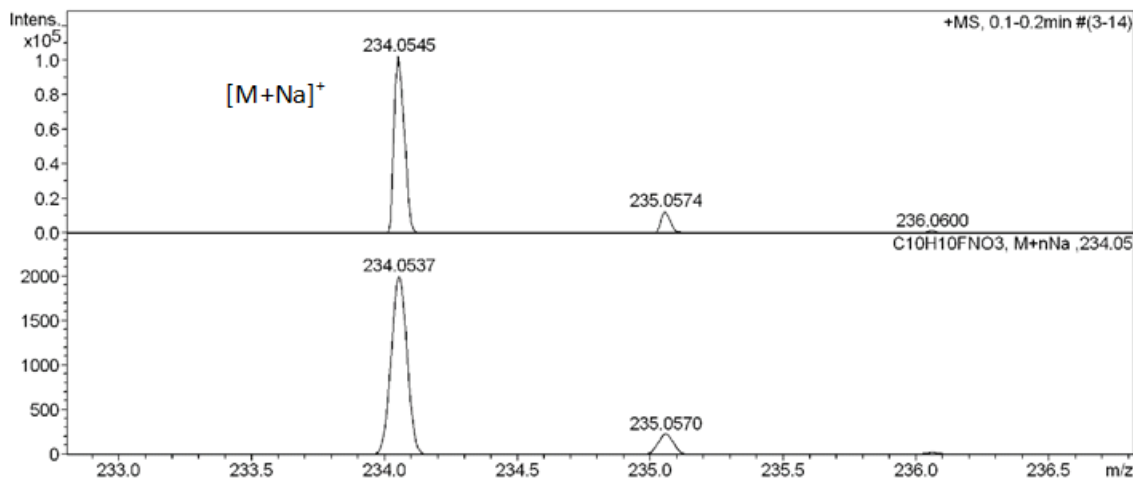

Figure. S54. ESI-HRMS spectra of benzamide 3j

mkg-520  
1H

7.68  
7.65  
7.55  
7.53  
7.06

4.21  
4.19  
3.78

-0.00

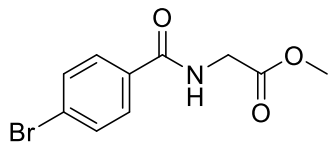

(3k)

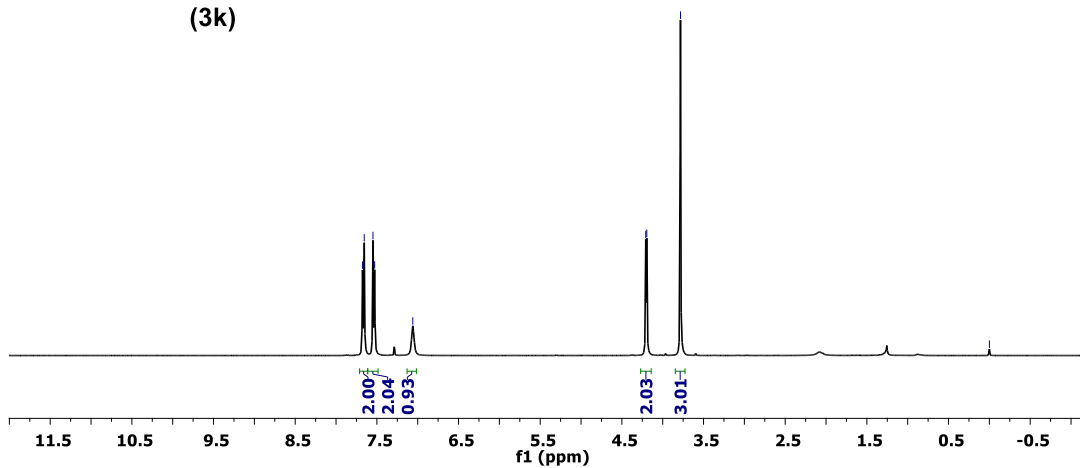

mkg-520  
13C

170.56  
166.69

132.36  
131.80  
128.74  
126.58

52.55  
41.71

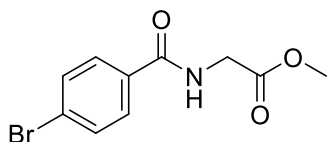

(3k)

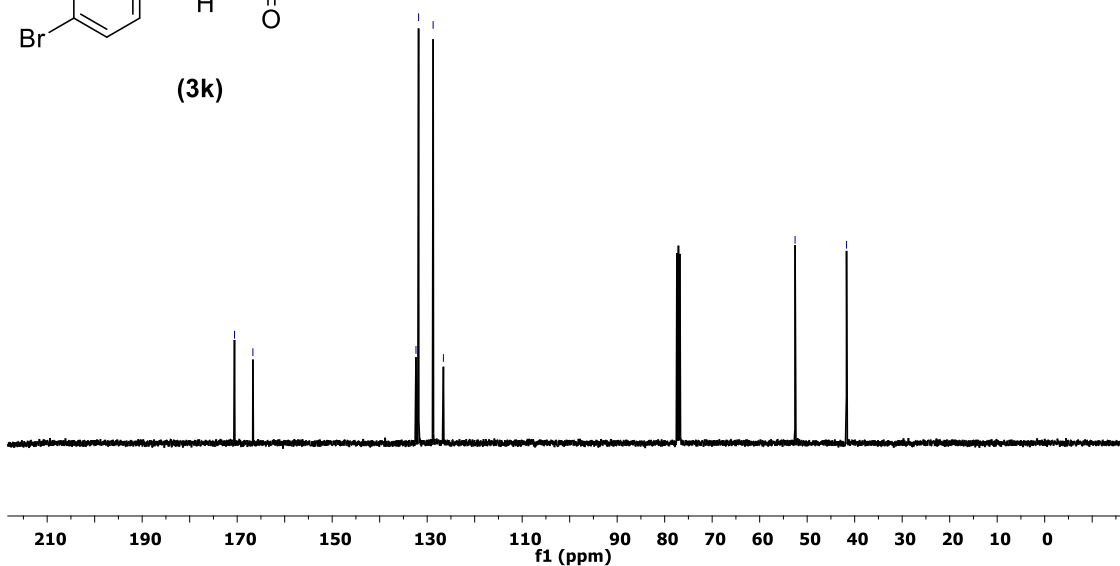

Figure. S55. <sup>1</sup>H, <sup>13</sup>C NMR spectra of benzamide 3k



# Display Report

## Analysis Info

Analysis Name D:\Data\JULY-2021\NKS\MKG\13072021\_NKS-MKG-520.d  
Method Pos\_tune\_low.m  
Sample Name Tmix-131118  
Comment

Acquisition Date 7/13/2021 6:07:51 PM

Operator PRAKASH BEHERA  
Instrument micrOTOF-Q II 10337

## Acquisition Parameter

|             |            |                       |           |                  |           |
|-------------|------------|-----------------------|-----------|------------------|-----------|
| Source Type | ESI        | Ion Polarity          | Positive  | Set Nebulizer    | 0.4 Bar   |
| Focus       | Not active | Set Capillary         | 4500 V    | Set Dry Heater   | 180 °C    |
| Scan Begin  | 50 m/z     | Set End Plate Offset  | -500 V    | Set Dry Gas      | 4.0 l/min |
| Scan End    | 3000 m/z   | Set Collision Cell RF | 130.0 Vpp | Set Divert Valve | Waste     |

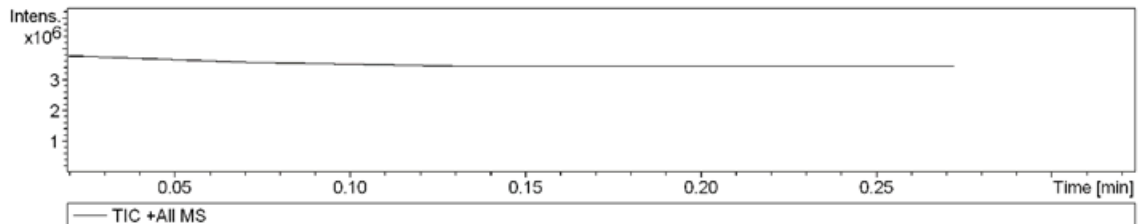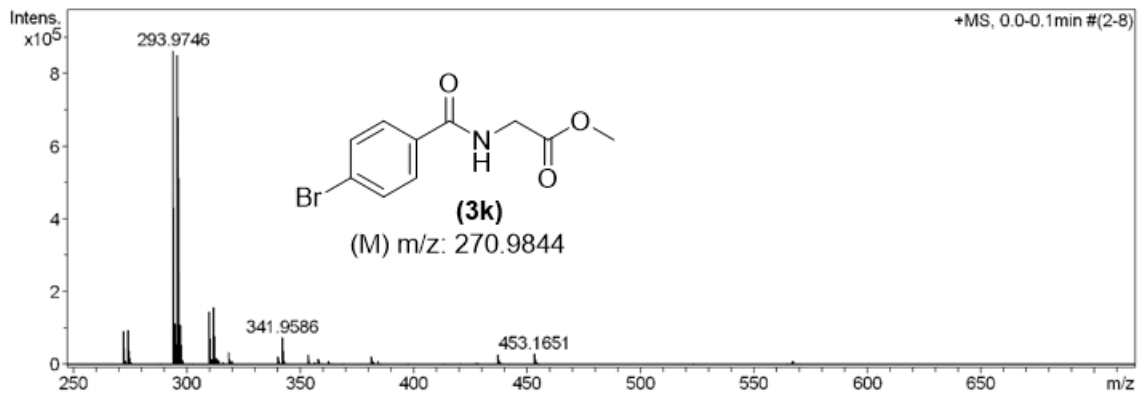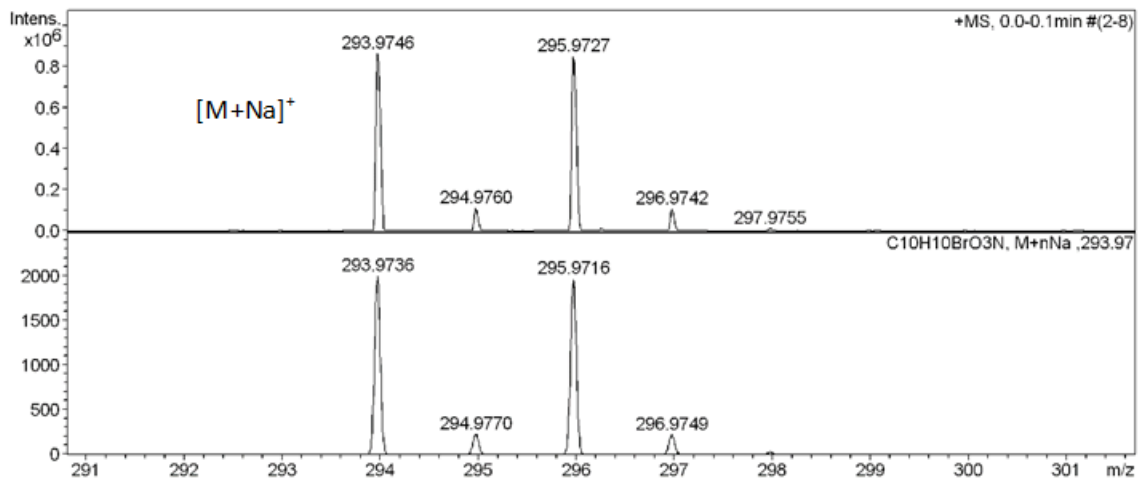

Figure. S56. ESI-HRMS spectra of benzamide **3k**

mkg-518  
1H

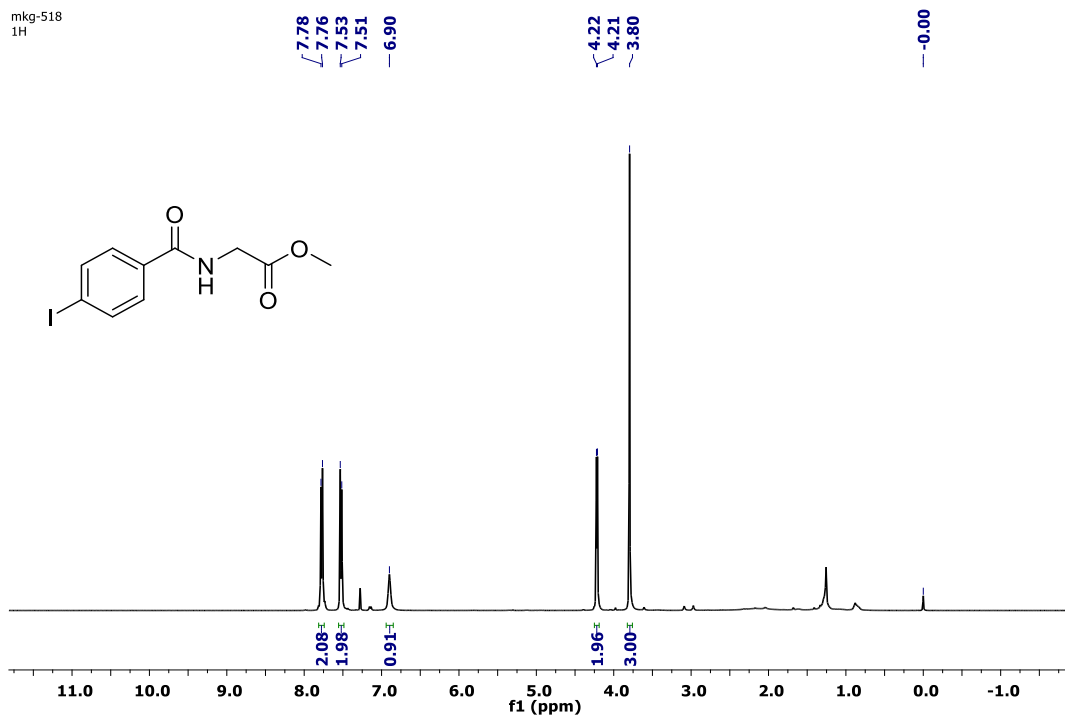

mkg-518  
13C

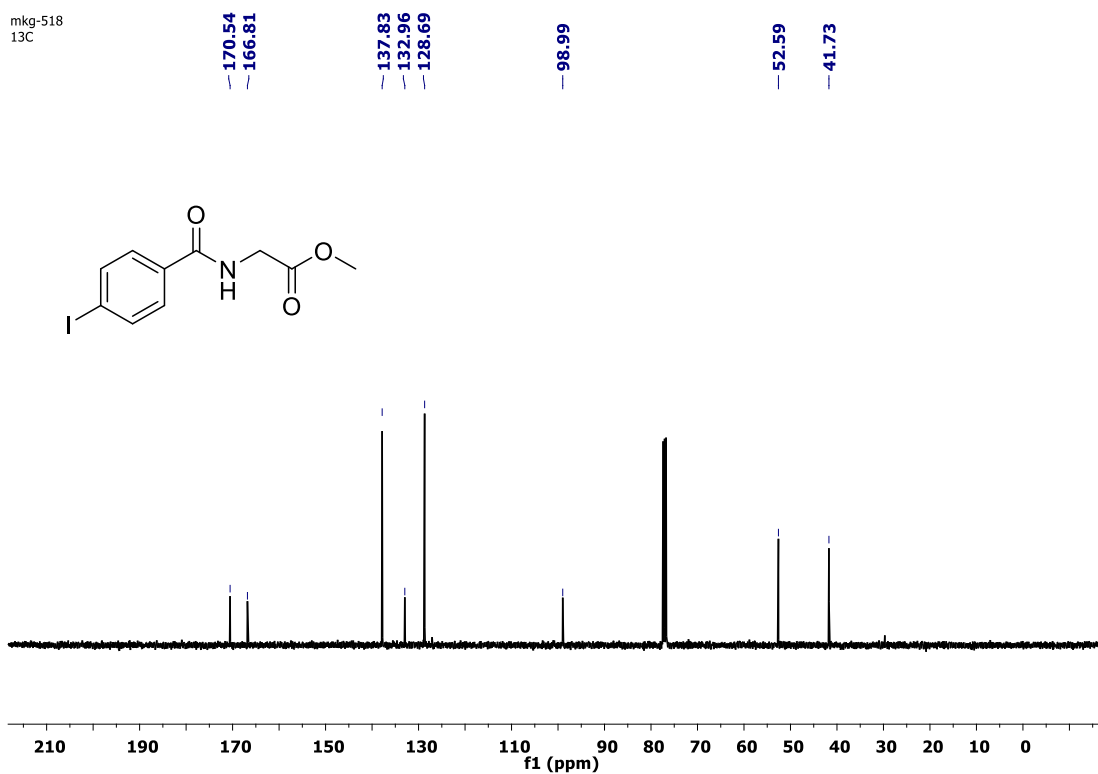

Figure. S57. <sup>1</sup>H, <sup>13</sup>C NMR spectra of benzamide 31

# Display Report

## Analysis Info

Analysis Name D:\Data\JULY-2021\NKS\MKG\13072021\_NKS-MKG-518.d  
Method Pos\_tune\_low.m  
Sample Name Tmix-131118  
Comment

Acquisition Date 7/13/2021 6:03:15 PM

Operator PRAKASH BEHERA  
Instrument micrOTOF-Q II 10337

## Acquisition Parameter

|             |            |                       |           |                  |           |
|-------------|------------|-----------------------|-----------|------------------|-----------|
| Source Type | ESI        | Ion Polarity          | Positive  | Set Nebulizer    | 0.4 Bar   |
| Focus       | Not active | Set Capillary         | 4500 V    | Set Dry Heater   | 180 °C    |
| Scan Begin  | 50 m/z     | Set End Plate Offset  | -500 V    | Set Dry Gas      | 4.0 l/min |
| Scan End    | 3000 m/z   | Set Collision Cell RF | 130.0 Vpp | Set Divert Valve | Waste     |

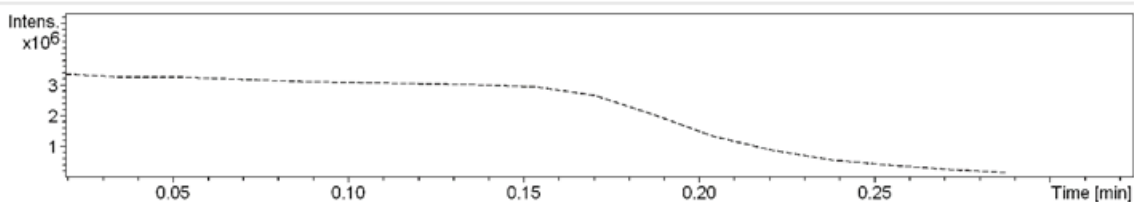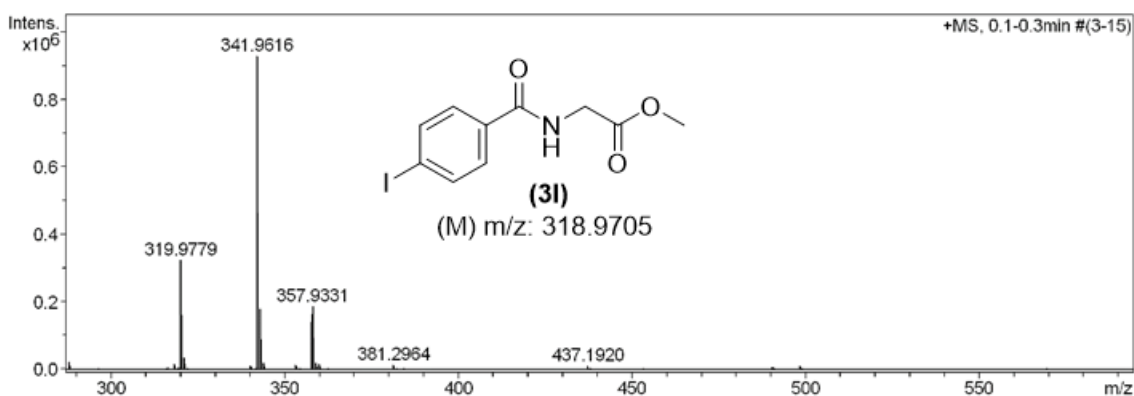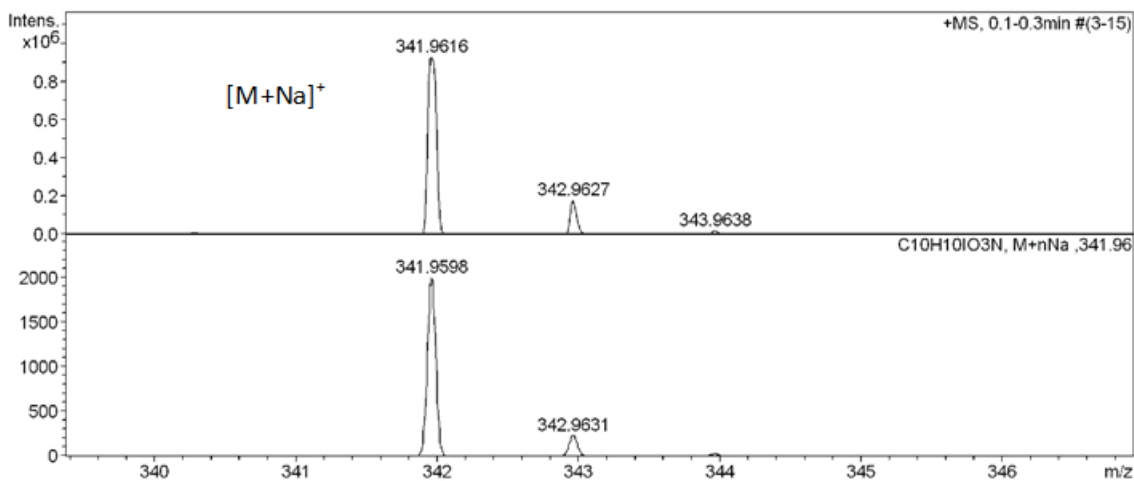

Figure. S58. ESI-HRMS spectra of benzamide 31

mkg-523  
1H

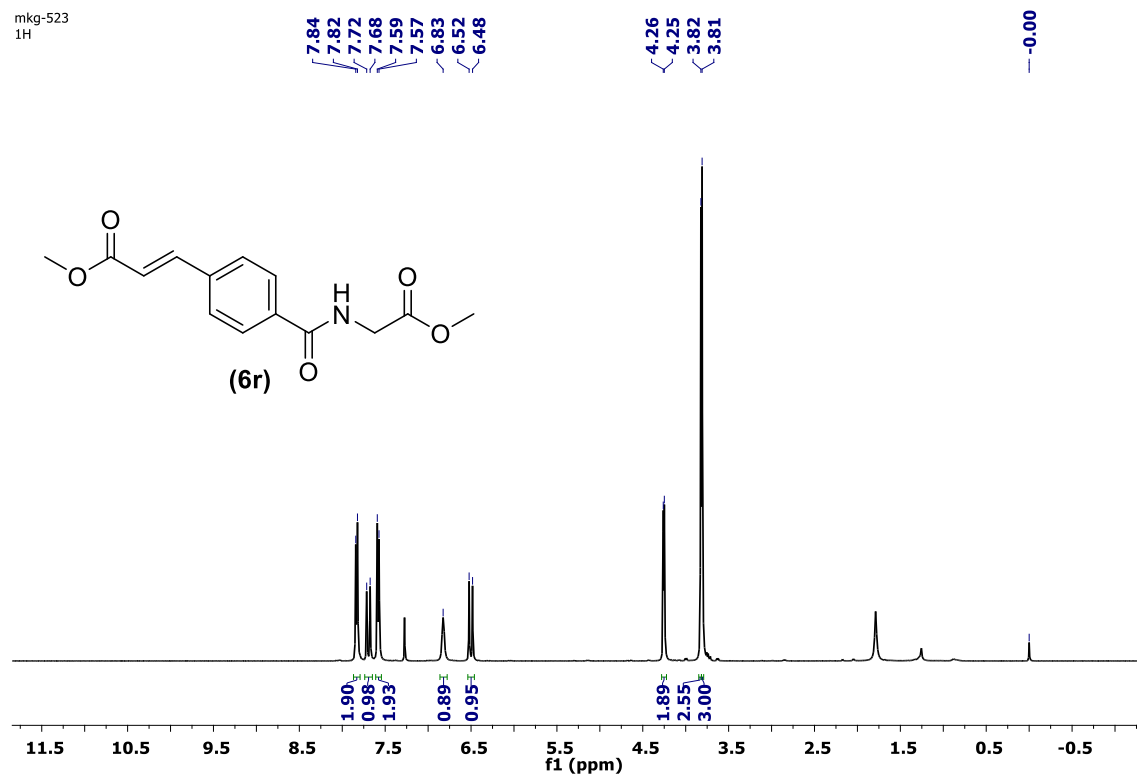

mkg-523  
13C

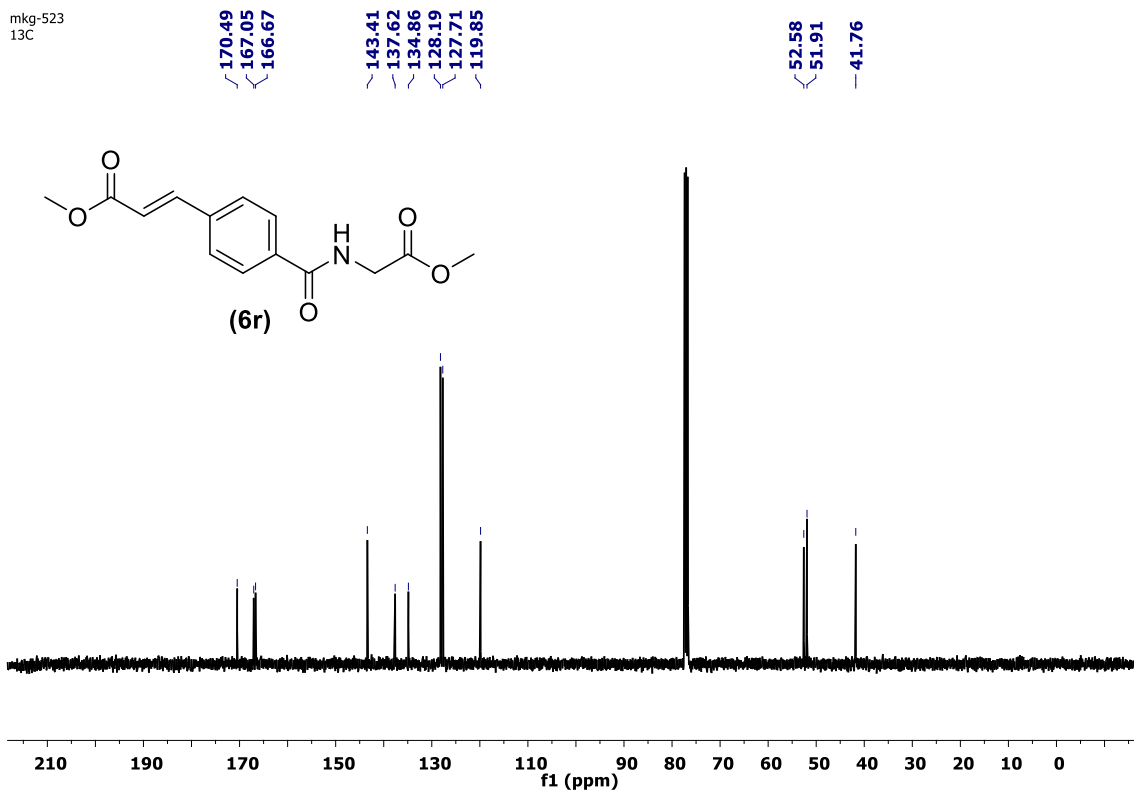

Figure. S59. <sup>1</sup>H, <sup>13</sup>C NMR spectra of benzamide **6r**

# Display Report

## Analysis Info

Analysis Name D:\Data\JULY-2021\NKS\MKG\13072021\_NKS-MKG-523.d  
Method Pos\_tune\_low.m  
Sample Name Tmix-131118  
Comment

Acquisition Date 7/13/2021 6:19:38 PM

Operator PRAKASH BEHERA  
Instrument micrOTOF-Q II 10337

## Acquisition Parameter

|             |            |                       |           |                  |           |
|-------------|------------|-----------------------|-----------|------------------|-----------|
| Source Type | ESI        | Ion Polarity          | Positive  | Set Nebulizer    | 0.4 Bar   |
| Focus       | Not active | Set Capillary         | 4500 V    | Set Dry Heater   | 180 °C    |
| Scan Begin  | 50 m/z     | Set End Plate Offset  | -500 V    | Set Dry Gas      | 4.0 l/min |
| Scan End    | 3000 m/z   | Set Collision Cell RF | 130.0 Vpp | Set Divert Valve | Waste     |

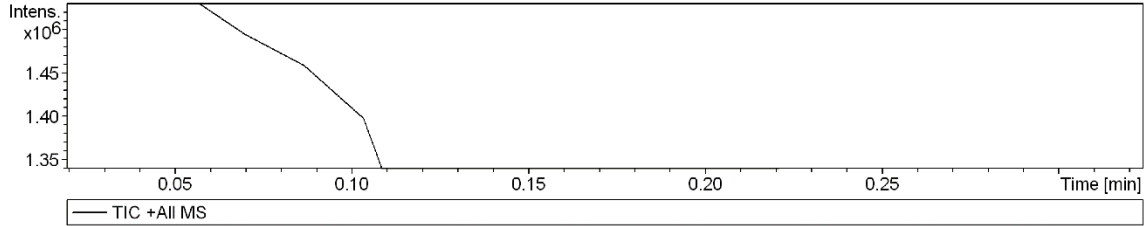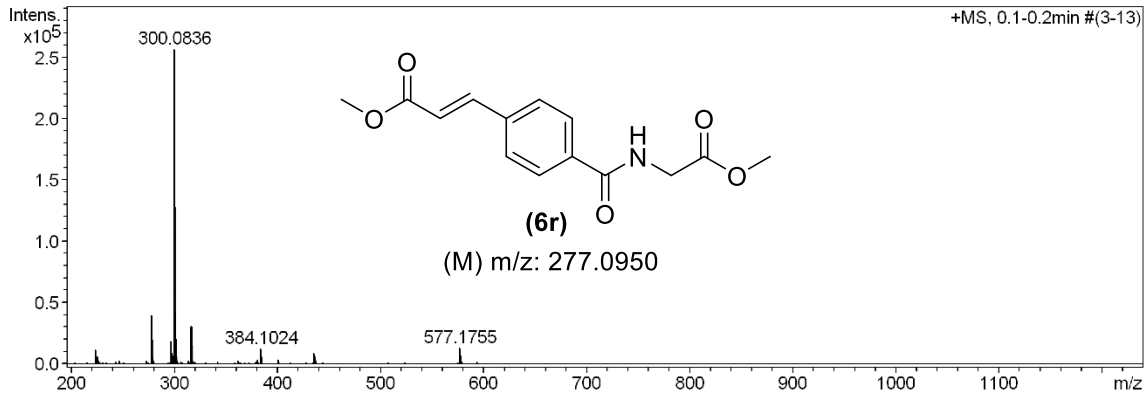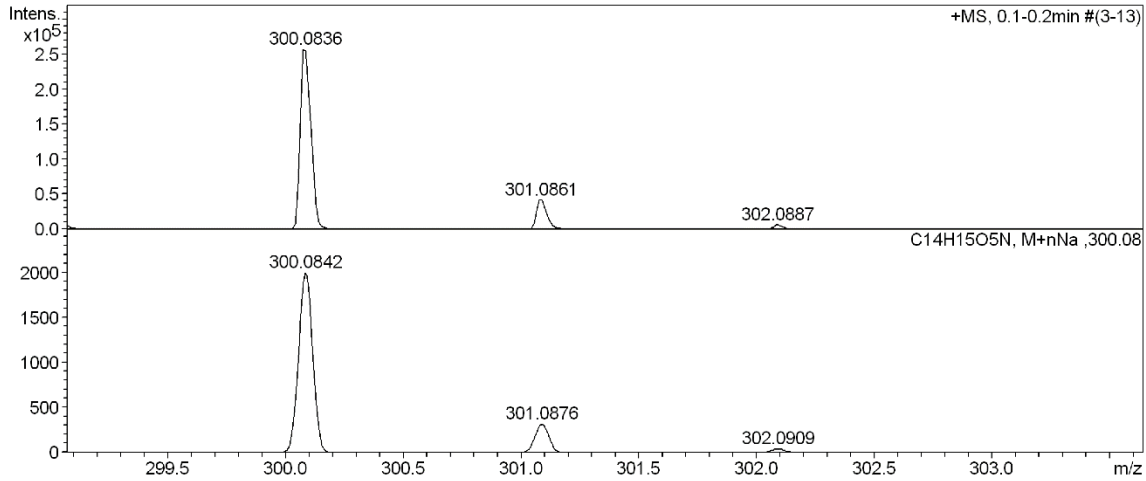

Figure. S60. ESI-HRMS spectra of benzamide 6r

## 2. X-ray studies of single crystal of indolinone (6a)

Crystal of indolinone(6a) was obtained in solvent mixture ethylacetate and hexane by slow evaporation method. The crystal data was collected on a Rigaku Oxford diffractometer at 293 K. Selected data collection parameters and other crystallographic results are summarized below. The program package SHELXTL1 and Olex2 was used for structure solution.

**Table S1.** Crystal data and structure refinement for Isoindolinone **6a** (CCDC with reference number 2098113).

|                                             |                                                               |
|---------------------------------------------|---------------------------------------------------------------|
| Identification code                         | NKS_MKG_454B                                                  |
| Empirical formula                           | C <sub>14</sub> H <sub>13</sub> NO <sub>5</sub>               |
| Formula weight                              | 275.25                                                        |
| Temperature/K                               | 301(3)                                                        |
| Crystal system                              | monoclinic                                                    |
| Space group                                 | P2 <sub>1</sub> /c                                            |
| a/Å                                         | 11.9576(3)                                                    |
| b/Å                                         | 13.9570(3)                                                    |
| c/Å                                         | 8.15414(18)                                                   |
| α/°                                         | 90                                                            |
| β/°                                         | 105.587(2)                                                    |
| γ/°                                         | 90                                                            |
| Volume/Å <sup>3</sup>                       | 1310.81(5)                                                    |
| Z                                           | 4                                                             |
| ρ <sub>calc</sub> /g/cm <sup>3</sup>        | 1.395                                                         |
| μ/mm <sup>-1</sup>                          | 0.903                                                         |
| F(000)                                      | 576.0                                                         |
| Crystal size/mm <sup>3</sup>                | 0.02 × 0.02 × 0.001                                           |
| Radiation                                   | CuKα (λ = 1.54184)                                            |
| 2θ range for data collection/°              | 7.676 to 150.506                                              |
| Index ranges                                | -15 ≤ h ≤ 15, -17 ≤ k ≤ 17, -6 ≤ l ≤ 9                        |
| Reflections collected                       | 10426                                                         |
| Independent reflections                     | 2602 [R <sub>int</sub> = 0.0328, R <sub>sigma</sub> = 0.0268] |
| Data/restraints/parameters                  | 2602/0/184                                                    |
| Goodness-of-fit on F <sup>2</sup>           | 1.080                                                         |
| Final R indexes [I >= 2σ (I)]               | R <sub>1</sub> = 0.0386, wR <sub>2</sub> = 0.1123             |
| Final R indexes [all data]                  | R <sub>1</sub> = 0.0420, wR <sub>2</sub> = 0.1155             |
| Largest diff. peak/hole / e Å <sup>-3</sup> | 0.23/-0.15                                                    |

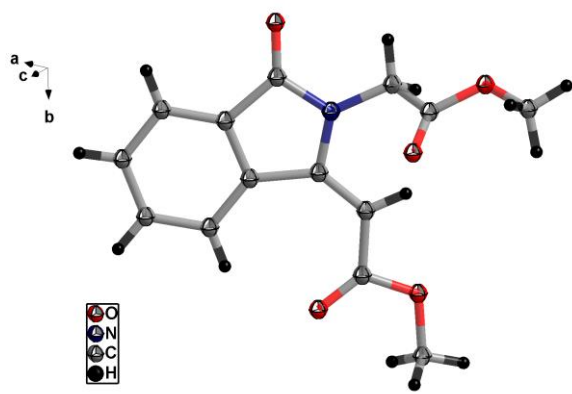

**Figure. S61.** ORTEP Diagram of indolinone(**6a**) [ellipsoid contour probability: 50%].
